# Supplementary material for: Synthesis of pyrazolo[5′,1′:2,3]imidazo[1,5-c]quinazolin-6(5H)-ones and molecular docking study of their affinity against the COVID-19 main protease
Source: Royal Society of Chemistry journal article supplement (doi:10.1039/d2ra03179e), 2022-01-01
Supplement: d2ra03179e1.pdf [file d2ra03179e1.pdf]

## Supplementary Information

# Synthesis of pyrazolo[5',1':2,3]imidazo[1,5-c]quinazolin-6(5H)-ones and molecular docking study of their affinity against the COVID-19 main protease

Shaghayegh Saeedi, Abbas Rahmati\*, Zahra Chavoshpour-Natanzi

Department of Chemistry, University of Isfahan, P.O. Box 81746-73441, Isfahan, Iran.

\*Corresponding author: Tel.: 98 31 37934943, E-mail address: [a.rahmati@sci.ui.ac.ir](mailto:a.rahmati@sci.ui.ac.ir)

### Table of contents:

1. Supporting Material S1: Characterization Data of the compounds (**4a-4u**).....S2- S10
2. Supporting Figures S1-S86: <sup>1</sup>H NMR, <sup>13</sup>C NMR, FT-IR and MASS of compounds (**4a-4u**) and 2D HMBC, HSQC NMR (**4j**).....S11-S75
3. Supporting Tables S1 - S4: Molecular docking results of ligand-target complex formation were summarized in the Tables.....S76-S82
4. Supporting Figures S87-S90: Complexes of all ligand-target interacting systems were visually shown that prepared by pymol software.....S77-S83

## 1. Characterization Data of the compounds

### 9-(tert-butyl)-12-(tert-butylamino)-2-chloropyrazolo[5',1':2,3]imidazo[1,5-c]quinazolin-6(5H)-one (4a)

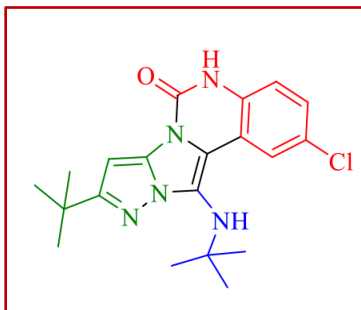

White solid; Mp: >250 °C; <sup>1</sup>H NMR (400 MHz, DMSO-d<sub>6</sub>) 1.27 (s, 9H), 1.33 (s, 9H), 4.89 (s, 1H), 6.15 (s, 1H), 7.11 (d, *j* = 8.6 Hz, 1H), 7.35 (dd, *j* = 8.6, *j* = 2.4 Hz 1H), 8.48 (d, *j* = 2.4 Hz, 1H); <sup>13</sup>C NMR (100 MHz, DMSO-d<sub>6</sub>) δ 30.31, 30.59, 32.77, 55.15, 81.62, 115.09, 116.74, 117.02, 121.48, 122.01, 126.30, 127.66, 133.00, 134.40, 143.95, 164.80. IR (KBr): cm<sup>-1</sup> 3392, 3319, 3059, 2961, 2770, 1707, 1581.

### 2-bromo-9-(tert-butyl)-12-(tert-butylamino)pyrazolo[5',1':2,3]imidazo[1,5-c]quinazolin-6(5H)-one (4b)

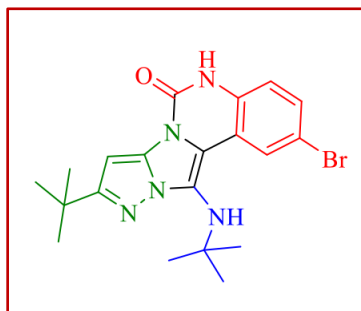

Off White solid; Mp: >250 °C; <sup>1</sup>H NMR (400 MHz, DMSO-d<sub>6</sub>) 1.28 (s, 9H), 1.33 (s, 9H), 4.87 (s, 1H), 6.15 (s, 1H), 7.05 (d, *j* = 8.5 Hz, 1H), 7.46 (d, *j* = 7.9 Hz, 1H), 8.63 (s, 1H), 11.26 (s, 1H); <sup>13</sup>C NMR (100 MHz, DMSO-d<sub>6</sub>) δ 30.30, 30.59, 32.77, 55.17, 81.62, 114.08, 115.51, 116.63, 117.32, 121.43, 124.96, 130.40, 133.35, 134.38, 143.95, 164.79. IR (KBr): cm<sup>-1</sup> 3396, 3329, 3059, 2960, 2766, 1707, 1581.

### 9-(tert-butyl)-12-(tert-butylamino)-2-methylpyrazolo[5',1':2,3]imidazo[1,5-c]quinazolin-6(5H)-one (4c)

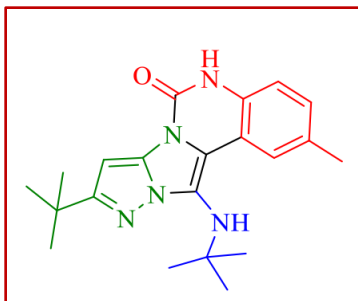

White solid; Mp: >250 °C; <sup>1</sup>H NMR (400 MHz, DMSO-d<sub>6</sub>) 1.28 (s, 9H), 1.34 (s, 9H), 2.33 (s, 3H), 4.71 (s, 1H), 6.13 (s, 1H), 7.02 (d, *j* = 8.2 Hz, 1H), 7.13 (d, *j* = 8.2 Hz, 1H), 8.31 (s, 1H), 11.08 (s, 1H); <sup>13</sup>C NMR (100 MHz, DMSO-d<sub>6</sub>) δ 20.64, 30.34, 30.64, 32.73, 55.10, 81.52, 113.25, 115.22, 117.85, 120.62, 123.02, 128.83, 131.39, 131.79, 134.23, 144.20, 164.30. IR (KBr): cm<sup>-1</sup> 3388, 3332, 3060, 2960, 2774, 1707, 1579.

**9-(tert-butyl)-12-(tert-butylamino)-2-methoxypyrazolo[5',1':2,3]imidazo[1,5-c]quinazolin-6(5H)-one (4d)**

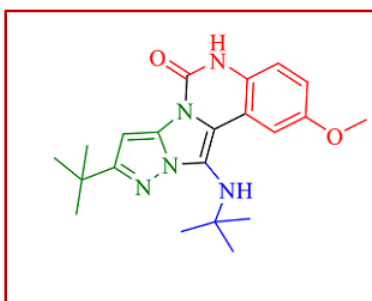

White solid; Mp: >250 °C; <sup>1</sup>H NMR (400 MHz, DMSO-d<sub>6</sub>) 1.43 (s, 9H), 1.47 (s, 9H), 3.93 (s, 3H), 4.92 (s, 1H), 6.26 (s, 1H), 7.07 (d, *j* = 8.8, *j* = 2.8 Hz, 1H), 7.19 (d, *j* = 8.8 Hz, 1H), 8.17 (d, *j* = 2.8 Hz, 1H), 11.15 (s, 1H); <sup>13</sup>C NMR (100 MHz, DMSO-d<sub>6</sub>) δ 30.41, 30.63, 32.75, 54.81, 55.30, 81.51, 106.28, 114.05, 115.54, 116.52, 117.83, 120.76, 127.79, 134.31, 144.03, 154.51, 164.41. IR (KBr): cm<sup>-1</sup> 3396, 3331, 3061, 2959, 2919, 2867, 1701, 1587.

**9-(tert-butyl)-12-(tert-butylamino)pyrazolo[5',1':2,3]imidazo[1,5-c]quinazolin-6(5H)-one (4e)**

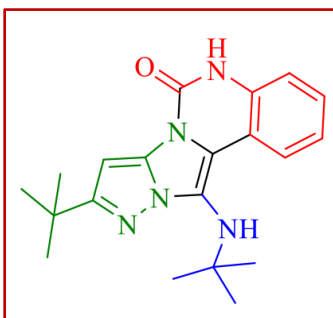

White solid; Mp: >250 °C; <sup>1</sup>H NMR (400 MHz, DMSO-d<sub>6</sub>) 1.28 (s, 9H), 1.34 (s, 9H), 4.72 (s, 1H), 6.15 (s, 1H), 7.12 (d, *j* = 8 Hz, 1H), 7.17 (ddd, appeared as a dt, *j* = 7.4, *j* = 1 Hz, 1H), 7.30 (ddd, appeared as a dt, *j* = 7.5, *j* = 0.9 Hz, 1H), 8.48 (dd, *j* = 7.8, *j* = 1 Hz, 1H), 11.16 (s, 1H); <sup>13</sup>C NMR (100 MHz, DMSO-d<sub>6</sub>) δ 30.31, 30.63, 32.73, 55.06, 81.56, 113.42, 115.33, 117.85, 120.79, 122.52, 123.02, 128.09, 134.05, 134.23, 144.21, 164.34. IR (KBr): cm<sup>-1</sup> 3401, 3304, 3084, 2961, 2867, 2789, 1718, 1583.

**9-(tert-butyl)-12-(tert-butylamino)-2,4-dimethylpyrazolo[5',1':2,3]imidazo[1,5-c]quinazolin-6(5H)-one (4f)**

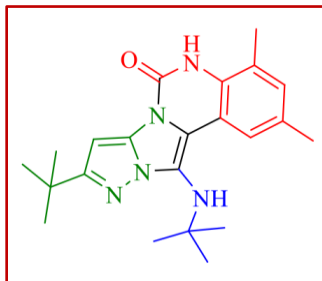

Off White solid; Mp: >250 °C; <sup>1</sup>H NMR (400 MHz, DMSO-d<sub>6</sub>) 1.27 (s, 9H), 1.34 (s, 9H), 2.29 (s, 3H), 2.32 (s, 3H), 4.68 (s, 1H), 6.15 (s, 1H), 6.98 (s, 1H), 8.25 (s, 1H), 10.20 (s, 1H); <sup>13</sup>C NMR (100 MHz, DMSO-d<sub>6</sub>) δ 17.65, 20.47, 30.33, 30.65, 32.74, 55.08, 81.69, 113.37, 117.89, 120.52, 120.93, 123.73, 130.04, 130.54, 131.05, 134.00, 144.52, 164.25. IR (KBr): cm<sup>-1</sup> 3406, 3307, 3215, 2959, 2924, 2864, 1712, 1577.

**8-bromo-12-(tert-butylamino)pyrazolo[5',1':2,3]imidazo[1,5-c]quinazolin-6(5H)-one (4g)**

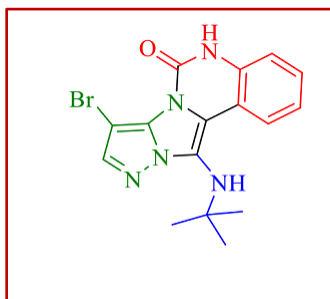

Yellow solid; Mp: 230-232 °C; <sup>1</sup>H NMR (400 MHz, DMSO-d<sub>6</sub>) 1.25 (s, 9H), 4.80 (s, 1H), 7.14 – 7.23 (m, 2H), 7.35 (ddd, appeared as a dt, *j* = 7.7, *j* = 1.3 Hz, 1H), 7.76 (s, 1H), 8.52 (dd, *j* = 7.5, *j* = 0.9 Hz, 1H), 11.22 (s, 1H); <sup>13</sup>C NMR (100 MHz, DMSO-d<sub>6</sub>) δ 30.30, 55.31, 70.38, 112.66, 115.32, 120.13, 120.79, 122.53, 123.35, 128.78, 131.74, 134.25, 143.29, 143.78. IR (KBr): cm<sup>-1</sup> 3405, 3277, 3081, 2959, 1718, 1586.

**8-bromo-12-(tert-butylamino)-2-methylpyrazolo[5',1':2,3]imidazo[1,5-c]quinazolin-6(5H)-one (4h)**



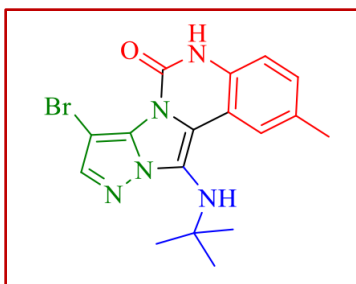

Off White solid; Mp: 225 decomposed; <sup>1</sup>H NMR (400 MHz, DMSO-d<sub>6</sub>) 1.26 (s, 9H), 2.34 (s, 3H), 4.80 (s, 1H), 7.06 (dd, *j* = 8.2 Hz, 1H), 7.18 (dd, *j* = 8.3 Hz, *j* = 1.6 Hz, 1H), 7.75 (s, 1H), 8.36 (s, 1H), 11.15 (s, 1H); <sup>13</sup>C NMR (100 MHz, DMSO-d<sub>6</sub>) δ 20.63, 30.35, 55.31, 70.34, 112.51, 115.22, 120.63, 123.30, 129.53, 131.41, 131.73, 132.03, 143.26, 143.77. IR (KBr): cm<sup>-1</sup> 3399, 3324, 3056, 2955, 2924, 1712, 1572.

**8-bromo-12-(tert-butylamino)-2-methoxypyrazolo[5',1':2,3]imidazo[1,5-c]quinazolin-6(5H)-one (4i)**

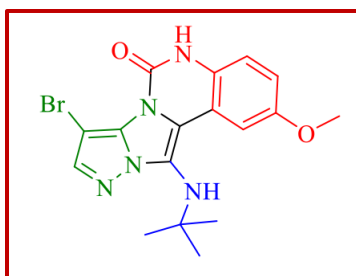

White solid; Mp: 227 decomposed; <sup>1</sup>H NMR (400 MHz, DMSO-d<sub>6</sub>) 1.27 (s, 9H), 3.80 (s, 3H), 4.87 (s, 3H), 6.94 – 7.31 (m, 2H), 7.76 (s, 1H), 8.09 (s, 1H), 11.10 (s, 1H); <sup>13</sup>C NMR (100 MHz, DMSO-d<sub>6</sub>) δ 30.42, 55.02, 55.38, 70.31, 106.62, 113.30, 116.32, 116.56, 120.08, 120.78, 128.05, 128.17, 128.87, 143.39, 143.60, 154.5. IR (KBr): cm<sup>-1</sup> 3399, 3331, 3208, 3097, 2964, 2254, 1709, 1573.

**8-bromo-12-(tert-butylamino)-2-chloropyrazolo[5',1':2,3]imidazo[1,5-c]quinazolin-6(5H)-one (4j)**

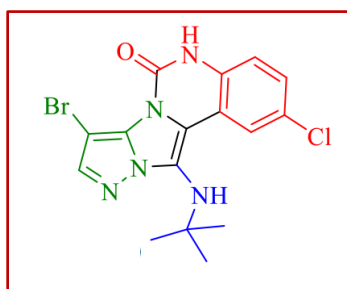

Off White solid; Mp: >250 °C; <sup>1</sup>H NMR (400 MHz, DMSO-d<sub>6</sub>) 1.26 (s, 9H), 4.95 (s, 1H), 7.16 (d, *j* = 8.7 Hz, 1H), 7.41 (dd, *j* = 8.7, *j* = 2.4 Hz, 1H), 7.79 (s, 1H), 8.54 (d, *j* = 2.4 Hz, 1H), 11.33 (s, 1H); <sup>13</sup>C NMR (100 MHz, DMSO-d<sub>6</sub>) δ 30.31, 55.41, 70.46, 114.34, 117.06, 119.07, 121.40,

122.36, 126.24, 128.38, 131.91, 133.28, 143.56, 143.67. IR (KBr):  $\text{cm}^{-1}$  3407, 3322, 3090, 2962, 2760, 1709, 1579.

**2,8-dibromo-12-(tert-butylamino)pyrazolo[5',1':2,3]imidazo[1,5-c]quinazolin-6(5H)-one (4k)**

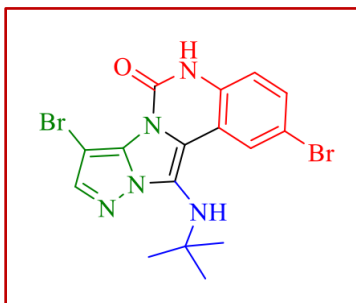

Off White solid; Mp: 243-245 °C;  $^1\text{H}$  NMR (400 MHz,  $\text{DMSO-d}_6$ ) 1.26 (s, 9H), 4.95 (s, 1H), 7.11 (d,  $j=7.3$  Hz, 1H), 7.52 (d,  $j=7.3$  Hz, 1H), 7.79 (s, 1H), 8.69 (s, 1H), 11.33 (s, 1H);  $^{13}\text{C}$  NMR (100 MHz,  $\text{DMSO-d}_6$ )  $\delta$  30.31, 55.41, 70.47, 114.01, 114.78, 117.33, 118.95, 121.38, 125.32, 131.10, 131.93, 133.62, 143.55, 143.66. IR (KBr):  $\text{cm}^{-1}$  3399, 3323, 3095, 2962, 1710, 1580.

**12-(tert-butylamino)-2-chloro-9-phenylpyrazolo[5',1':2,3]imidazo[1,5-c]quinazolin-6(5H)-one (4l)**

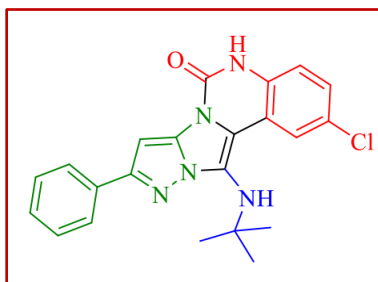

White solid; Mp: >250 °C;  $^1\text{H}$  NMR (400 MHz,  $\text{DMSO-d}_6$ ) 1.34 (s, 9H), 5.02 (s, 1H), 6.80 (s, 1H), 7.16 (d,  $j = 8.7$  Hz, 1H), 7.33 (t,  $j = 7.4$  Hz, 1H), 7.37-7.48 (m, 3H), 7.96 (d,  $j = 7.8$  Hz, 1H), 8.53 (d,  $j = 2.4$  Hz, 1H), 11.41 (s, 1H);  $^{13}\text{C}$  NMR (100 MHz,  $\text{DMSO-d}_6$ )  $\delta$  30.40, 55.32, 82.74, 114.81, 117.16, 117.92, 121.46, 122.18, 125.30, 126.41, 127.70, 128.05, 128.68, 133.17, 133.98, 135.23, 143.87, 153.31. IR (KBr):  $\text{cm}^{-1}$  3403, 3316, 3133, 3060, 2965, 2916, 2867, 1722, 1587.

**12-(tert-butylamino)-2-methyl-9-phenylpyrazolo[5',1':2,3]imidazo[1,5-c]quinazolin-6(5H)-one (4m)**

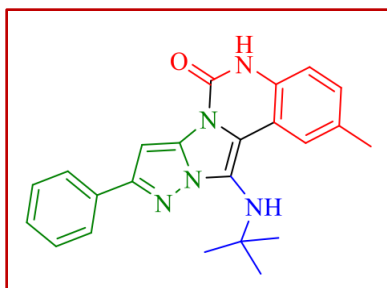

White solid; Mp: >250 °C; <sup>1</sup>H NMR (400 MHz, DMSO-*d*<sub>6</sub>) 1.46 (s, 9H), 2.48 (s, 3H), 4.97 (s, 1H), 6.90 (s, 1H), 7.19 (d, *j* = 8.3 Hz, 1H), 7.30 (dd, *j* = 8.3, *j* = 1.5 Hz, 1H), 7.45 (t, *j* = 7.3 Hz, 1H), 7.56 (dd, appeared as a t, *j* = 7.6 Hz, 2H), 8.08 (dd, *j* = 7.8, *j* = 1.3 Hz, 2H), 8.49 (s, 1H), 11.34 (s, 1H); <sup>13</sup>C NMR (100 MHz, DMSO-*d*<sub>6</sub>) δ 20.66, 30.43, 55.27, 82.69, 112.97, 115.35, 119.05, 120.61, 123.16, 125.22, 127.57, 128.66, 129.24, 131.54, 131.95, 134.12, 135.06, 144.10, 152.85. IR (KBr): cm<sup>-1</sup> 3403, 3314, 3061, 2966, 2917, 2863, 1717, 1591.

**12-(tert-butylamino)-2-methoxy-9-phenylpyrazolo[5',1':2,3]imidazo[1,5-c]quinazolin-6(5H)-one (4n)**

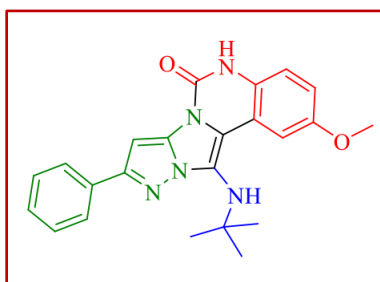

White solid; Mp: >250 °C; <sup>1</sup>H NMR (400 MHz, DMSO-*d*<sub>6</sub>) 1.48 (s, 9H), 3.95 (s, 3H), 5.06 (s, 1H), 6.90 (s, 1H), 7.11 (dd, *j* = 8.8, *j* = 2.8 Hz, 1H), 7.23 (d, *j* = 8.8 Hz, 1H), 7.45 (t, *j* = 7.3 Hz, 1H), 7.56 (dd, appeared as a t, *j* = 7.6 Hz, 2H), 8.08 (dd, *j* = 8.4, *j* = 1.3 Hz, 2H), 8.21 (d, *j* = 2.8 Hz, 2H), 11.29 (s, 1H); <sup>13</sup>C NMR (100 MHz, DMSO-*d*<sub>6</sub>) δ 30.51, 54.97, 55.33, 82.66, 106.35, 113.77, 115.98, 116.67, 119.01, 120.75, 125.24, 127.60, 127.96, 128.67, 134.09, 135.14, 143.92, 152.96, 154.57. IR (KBr): cm<sup>-1</sup> 3392, 3315, 3064, 2962, 2924, 2870, 1712, 1587.

**12-(tert-butylamino)-9-phenylpyrazolo[5',1':2,3]imidazo[1,5-c]quinazolin-6(5H)-one (4o)**

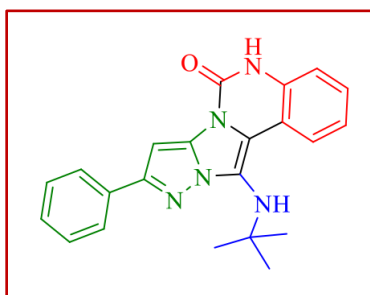

Off White solid; Mp: >250 °C; <sup>1</sup>H NMR (400 MHz, DMSO-d<sub>6</sub>) 1.33 (s, 9H), 4.86 (s, 1H), 6.79 (s, 1H), 7.16 (d, *j* = 8.0 Hz, 1H), 7.21 (t, *j* = 7.5 Hz, 1H), 7.29- 7.38 (m, 2H), 7.44 (t, *j* = 7.6 Hz, 2H), 7.95 (d, *j* = 7.4 Hz, 1H), 8.52 (d, *j* = 7.8 Hz, 1H) 11.29 (s, 1H); <sup>13</sup>C NMR (100 MHz, DMSO-d<sub>6</sub>) δ 30.40, 55.22, 82.71, 113.15, 115.46, 119.05, 120.80, 122.65, 123.18, 125.26, 127.57, 128.66, 134.12, 134.23, 135.09, 144.12, 152.92. IR (KBr): cm<sup>-1</sup> 3402, 3304, 3063, 2930, 2789, 1715, 1590.

**12-(tert-butylamino)-2,4-dimethyl-9-phenylpyrazolo[5',1':2,3]imidazo[1,5-c]quinazolin-6(5H)-one (4p)**

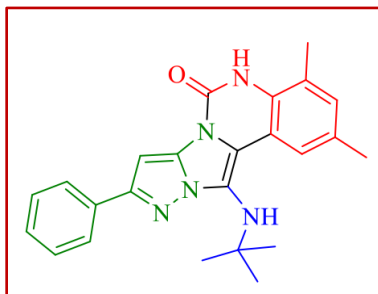

White solid; Mp: >250 °C; <sup>1</sup>H NMR (400 MHz, DMSO-d<sub>6</sub>) 1.32 (s, 9H), 2.31 (s, 3H), 2.34 (s, 3H), 4.81 (s, 1H), 6.80 (s, 1H), 7.03 (s, 1H), 7.31 (t, *j* = 7.3 Hz, 1H), 7.43 (t, *j* = 7.6 Hz, 2H), 7.96 (d, *j* = 7.4 Hz, 2H), 8.30 (s, 1H), 10.33 (s, 1H); <sup>13</sup>C NMR (100 MHz, DMSO-d<sub>6</sub>) δ 17.67, 20.48, 30.43, 55.23, 82.87, 113.11, 119.08, 120.53, 121.07, 123.87, 125.24, 127.54, 128.64, 130.22, 130.92, 131.20, 134.14, 134.86, 144.42, 152.84. IR (KBr): cm<sup>-1</sup> 3405, 3313, 3222, 3110, 2967, 2924, 2867, 1708, 1574.

**8-bromo-2-chloro-12-(cyclohexylamino)pyrazolo[5',1':2,3]imidazo[1,5-c]quinazolin-6(5H)-one (4q)**

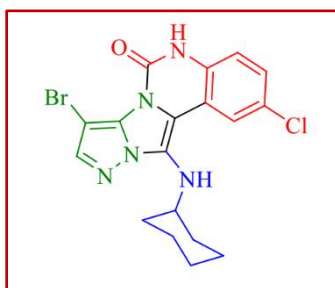

White solid; Mp: >250 °C; <sup>1</sup>H NMR (400 MHz, DMSO-d<sub>6</sub>) 1.16 – 1.24 (m, 3H), 1.28 – 1.37 (m, 2H), 1.51 – 1.56 (m, 1H), 1.67 – 1.73 (m, 2H), 1.83 – 1.89 (m, 2H), 3.45 – 3.54 (m, 1H), 5.36 (d, *j* = 5.9 Hz, 1H), 7.14 (d, *j* = 8.6 Hz, 1H), 7.36 (dd, *j* = 8.7, 2.4 Hz, 1H), 7.80 (s, 1H), 8.28 (d, *j* = 2.3 Hz, 1H), 11.22 (s, 1H); <sup>13</sup>C NMR (100 MHz, DMSO-d<sub>6</sub>) δ 24.27, 25.36, 33.32, 54.28, 70.58, 114.75, 116.87, 121.64, 122.96, 126.63, 127.73, 132.84, 143.63, 144.11. IR (KBr) (ν<sub>max</sub>/cm<sup>-1</sup>): 3405, 3277, 3082, 2959, 1718, 1586. MS (EI, 70 eV) *m/z*: 439 (M<sup>+</sup>).

**8-bromo-12-(cyclohexylamino)-2-methylpyrazolo[5',1':2,3]imidazo[1,5-c]quinazolin-6(5H)-one (4r)**

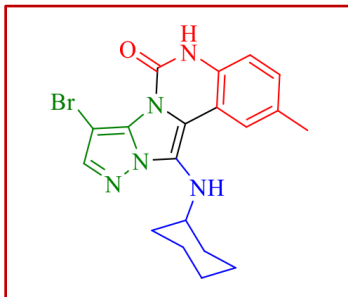

Off White solid; Mp: 243-245 °C; <sup>1</sup>H NMR (400 MHz, DMSO-d<sub>6</sub>) 1.17 – 1.24 (m, 3H), 1.31 – 1.39 (m, 2H), 1.51 – 1.56 (m, 1H), 1.68 – 1.74 (m, 2H), 1.83 – 1.89 (m, 2H), 2.34 (s, 3H), 3.40 – 3.48 (m, 1H), 5.11 (d, *j* = 6.0 Hz, 1H), 7.05 (d, *j* = 8.2 Hz, 1H), 7.14 (dd, *j* = 8.3 Hz, *j* = 1.4 Hz, 1H), 7.76 (s, 1H), 8.11 (s, 1H), 11.04 (s, 1H); <sup>13</sup>C NMR (100 MHz, DMSO-d<sub>6</sub>) δ 20.66, 24.31, 25.39, 33.28, 54.53, 70.47, 112.81, 115.13, 115.91, 122.13, 122.65, 128.93, 131.64, 131.78, 143.65, 143.84. IR (KBr): cm<sup>-1</sup> 3382, 3291, 2922, 2851, 1698, 1501.

**8-bromo-12-(cyclohexylamino)-2-methoxypyrazolo[5',1':2,3]imidazo[1,5-c]quinazolin-6(5H)-one (4s)**

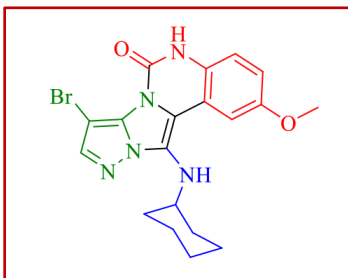

White solid; Mp: 247-248 °C; <sup>1</sup>H NMR (400 MHz, DMSO-d<sub>6</sub>) 1.16 – 1.24 (m, 3H), 1.29 – 1.39 (m, 2H), 1.50 – 1.56 (m, 1H), 1.67 – 1.74 (m, 2H), 1.81 – 1.92 (m, 2H), 3.39 – 4.48 (m, 1H), 5.20 (d, *j* = 5.8 Hz, 1H), 6.96 (dd, *j* = 8.8, *j* = 2.7 Hz, 1H), 7.09 (d, *j* = 8.8 Hz, 1H), 7.77 (s, 1H), 7.85 (d, *j* = 2.7 Hz, 1H), 11.01 (s, 1H); <sup>13</sup>C NMR (100 MHz, DMSO-d<sub>6</sub>) δ 24.18, 25.40, 33.32, 54.45, 55.31, 70.46, 106.34, 113.59, 115.37, 116.27, 116.42, 122.14, 127.68, 131.68, 143.75, 154.79. IR (KBr): cm<sup>-1</sup> 3401, 3283, 3066, 2927, 1711, 1574.

**8-bromo-12-(cyclohexylamino)pyrazolo[5',1':2,3]imidazo[1,5-c]quinazolin-6(5H)-one (4t)**

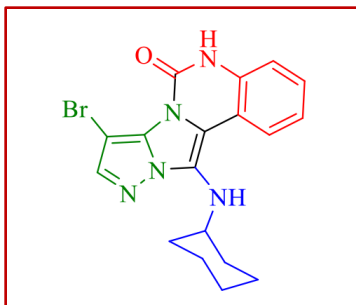

White solid; Mp: >250 °C; <sup>1</sup>H NMR (400 MHz, DMSO-d<sub>6</sub>) 1.26 – 1.34 (m, 3H), 1.39 – 1.49 (m, 2H), 1.63 – 1.69 (m, 1H), 1.78 – 1.85 (m, 2H), 1.94 – 2.01 (m, 2H), 3.52 – 3.60 (m, 1H), 5.25 (d, *j* = 5.8 Hz, 1H), 7.27 (d, *j* = 8.0 Hz, 1H), 7.32 (ddd, appeared as a dt, *j* = 8.8, *j* = 2.7 Hz, 1H), 7.44 (ddd, appeared as a dt, *j* = 7.92, *j* = 7.48, *j* = 1.24 Hz, 1H), 7.89 (s, 1H), 8.42 (d, *j* = 7.04 Hz, 1H), 11.26 (s, 1H); <sup>13</sup>C NMR (100 MHz, DMSO-d<sub>6</sub>) δ 24.37, 25.39, 33.24, 54.47, 70.52, 112.97, 115.23, 116.09, 122.15, 122.66, 122.82, 128.20, 133.92, 143.68, 143.84. IR (KBr): cm<sup>-1</sup> 3403, 3243, 3088, 2925, 1712, 1589.

**8-bromo-2-iodo-12-((2,4,4-trimethylpentan-2-yl)amino)pyrazolo[5,1':2,3]imidazo[1,5-c]quinazolin-6(5H)-one (4u)**

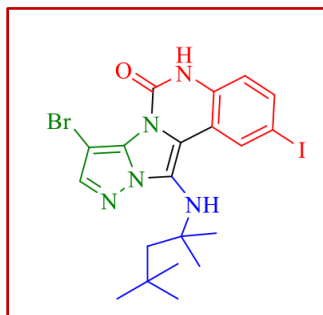

White solid; Mp: 250 decomposed; <sup>1</sup>H NMR (400 MHz, DMSO-d<sub>6</sub>) 1.22 (s, 9H), 1.37 (s, 6H), 1.91 (s, 2H), 4.85 (s, 1H), 7.08 (d, *j*=8.5 Hz, 1H), 7.77 (dd, *j*=8.5, *j*=1.9 Hz, 1H), 7.91 (s, 1H), 9.02 (d, *j* = 1.9 Hz, 1H), 11.42 (s, 1H); <sup>13</sup>C NMR (100 MHz, DMSO-d<sub>6</sub>) δ 29.19, 31.52, 31.70, 56.17, 59.45, 70.42, 85.61, 115.03, 117.42, 121.18, 131.23, 133.95, 136.69, 143.58. IR (KBr): cm<sup>-1</sup> 3400, 3372, 3056, 2945, 2766, 1718, 1580.

**$^1\text{H}$  NMR,  $^{13}\text{C}$  NMR, FT-IR and MASS of compound (4a)**

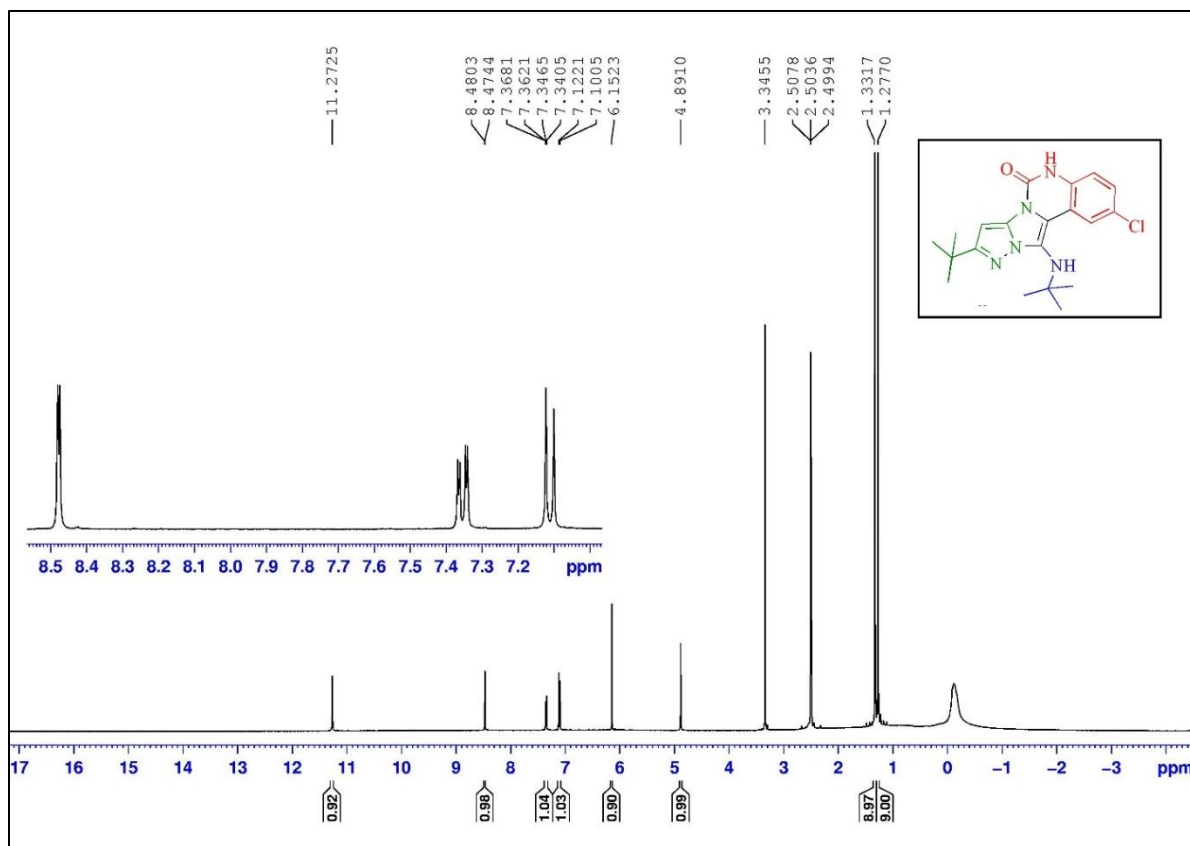

**Figure S1.**  $^1\text{H}$  NMR spectrum of compound (4a) in DMSO.

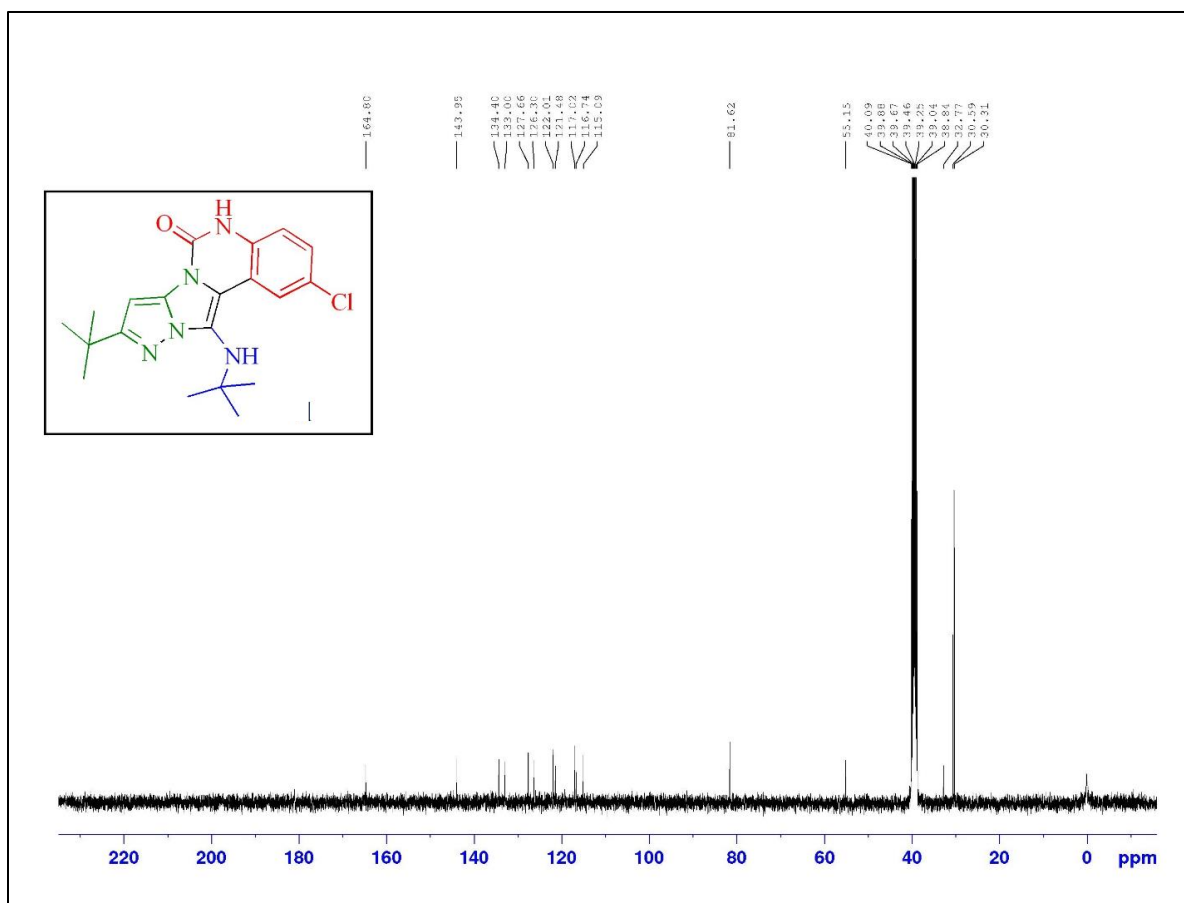

**Figure S2.** <sup>13</sup>C NMR spectrum of compound (4a) in DMSO.

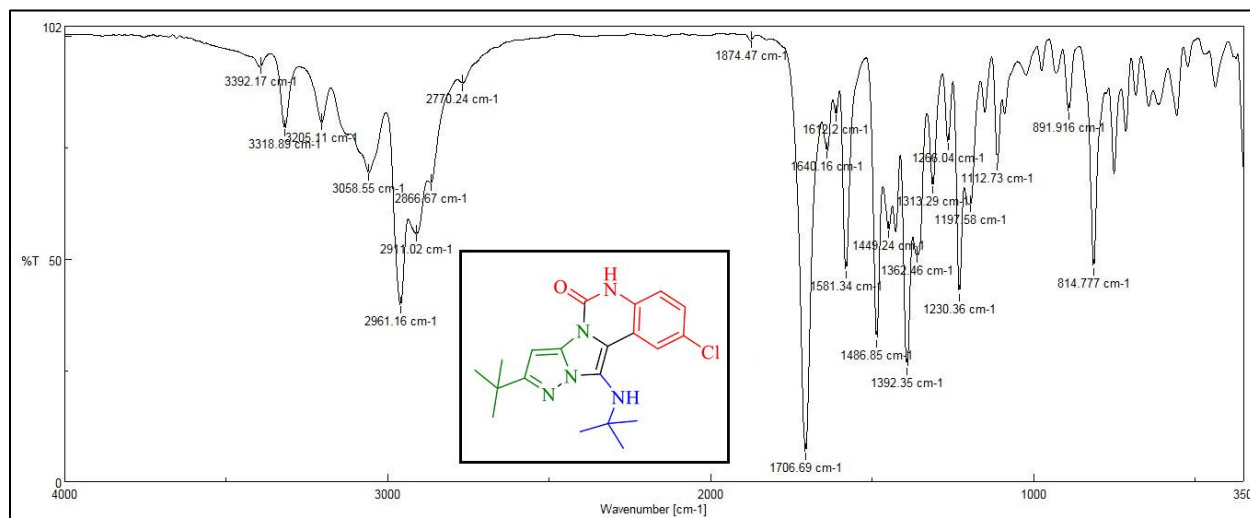

**Figure S3.** FT-IR spectrum of compound (4a).



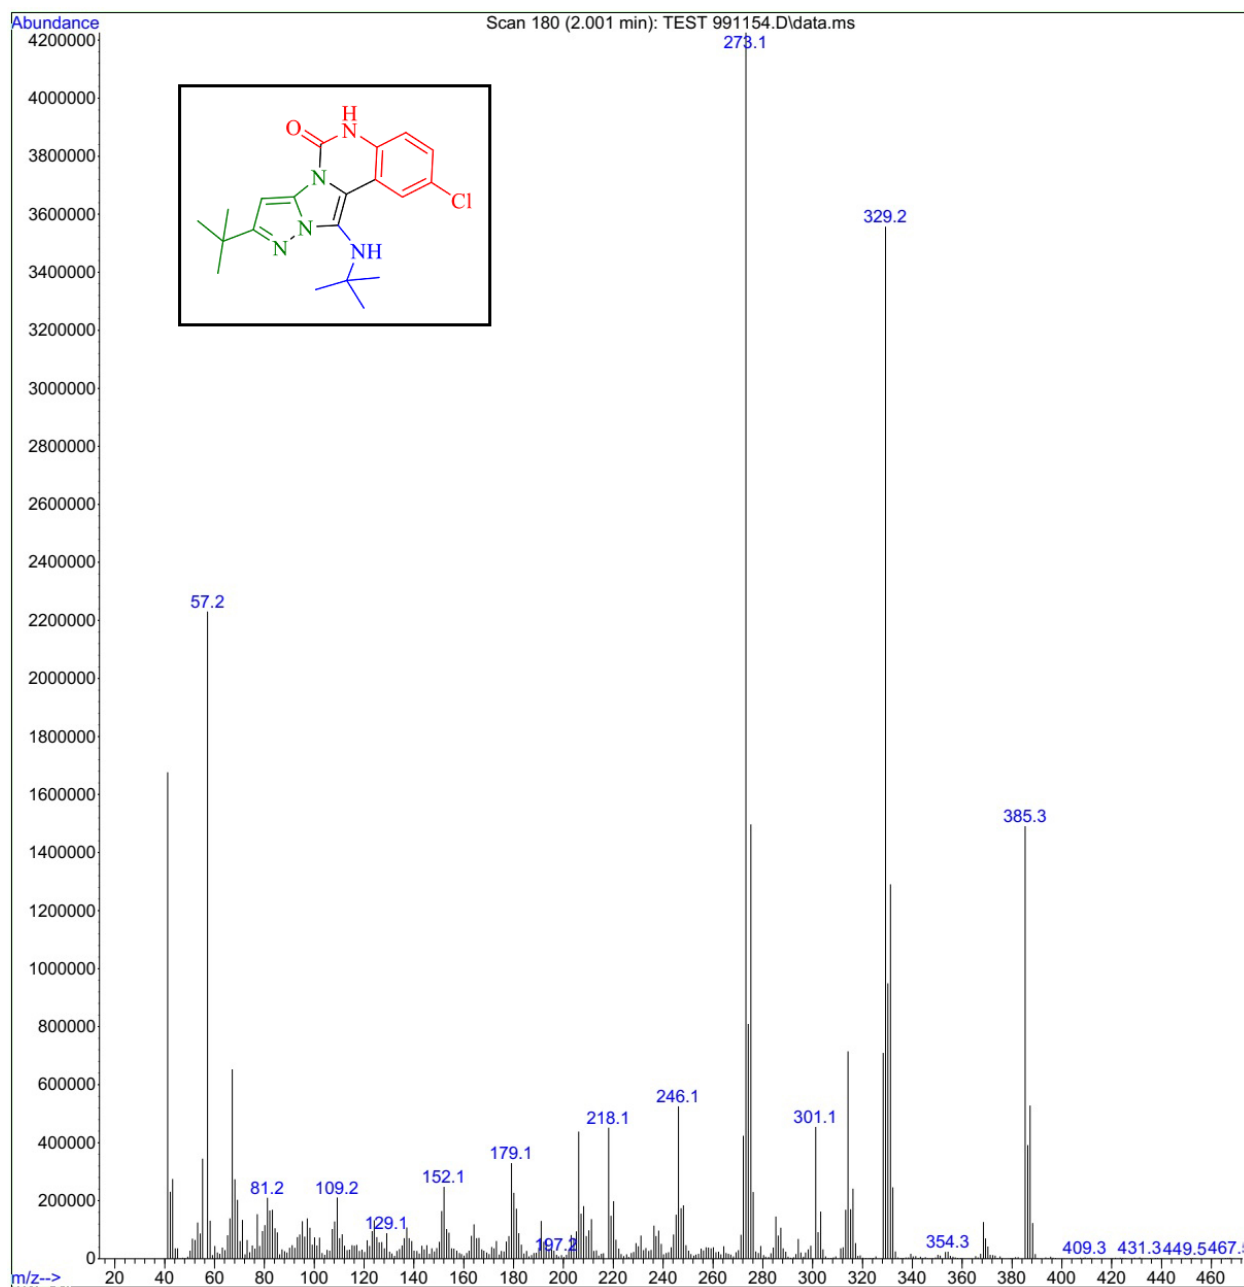

Figure S4. MASS spectrum of compound (4a).

$^1\text{H}$  NMR,  $^{13}\text{C}$  NMR, FT-IR and MASS of compound (4b)

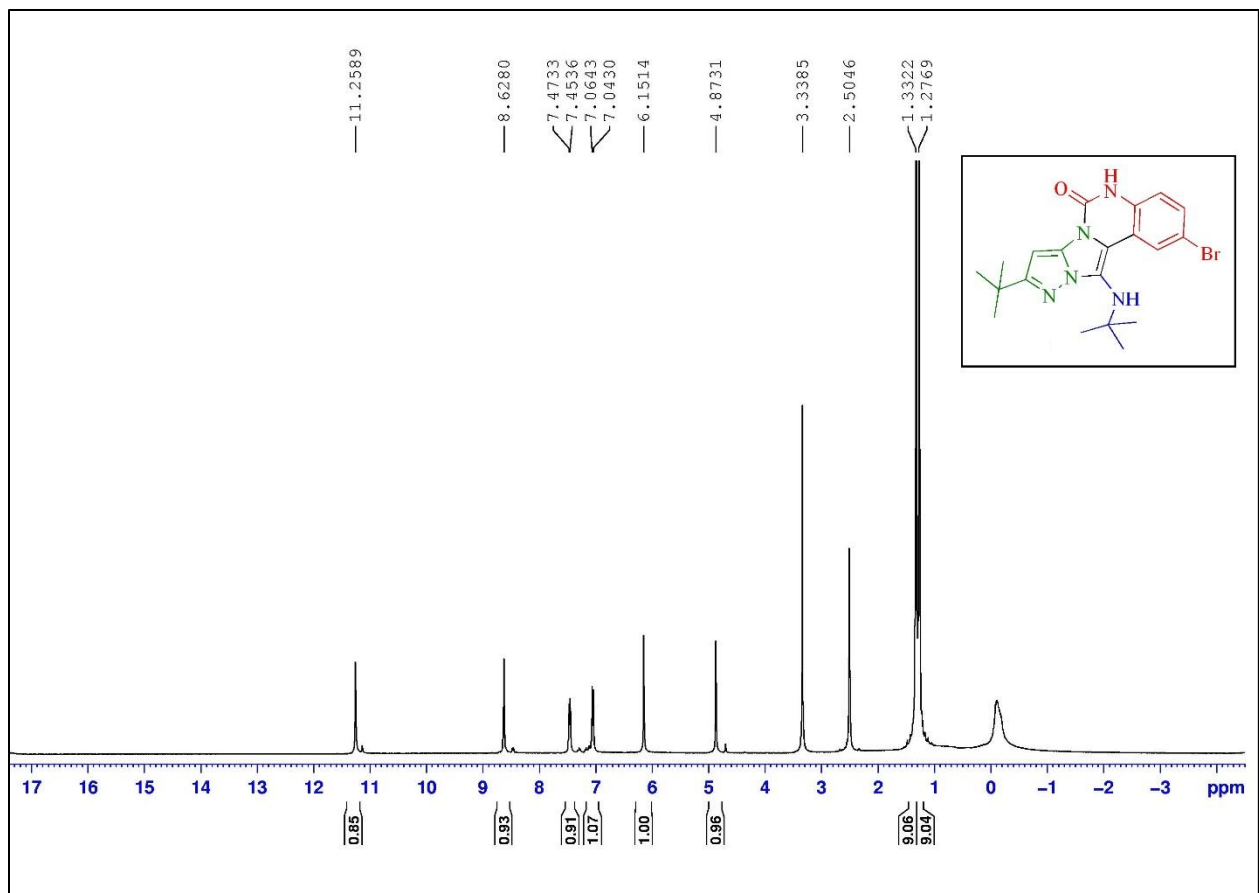

Figure S5.  $^1\text{H}$  NMR spectrum of compound (4b) in DMSO.

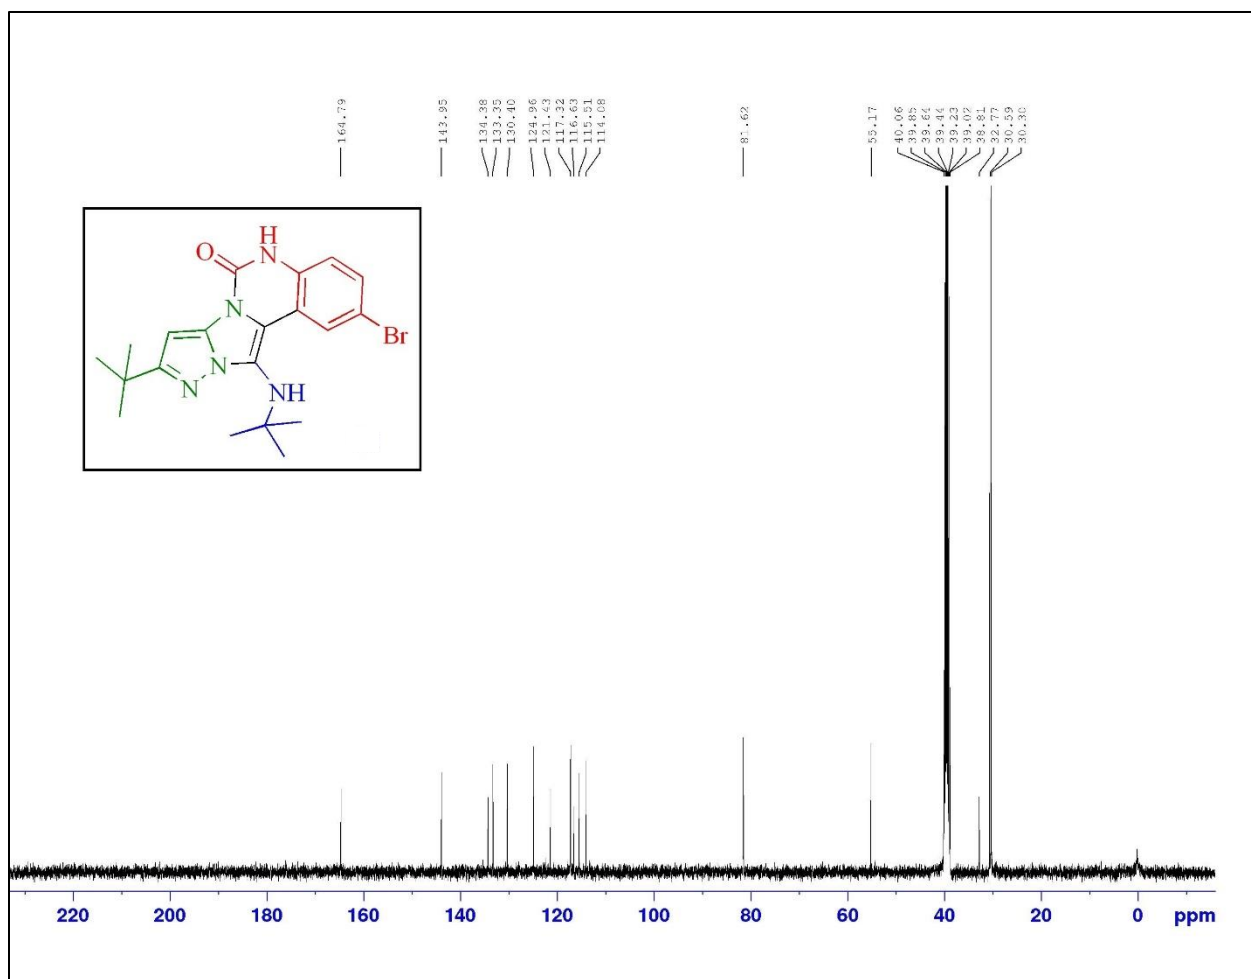

Figure S6. <sup>13</sup>C NMR spectrum of compound (4b) in DMSO.

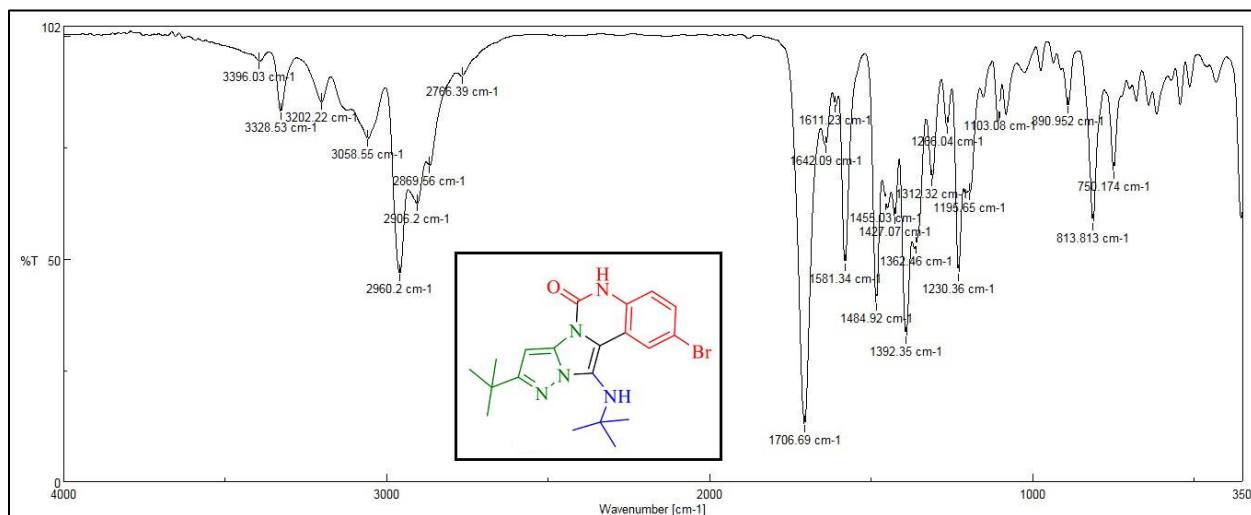

Figure S7. FT-IR spectrum of compound (4b).

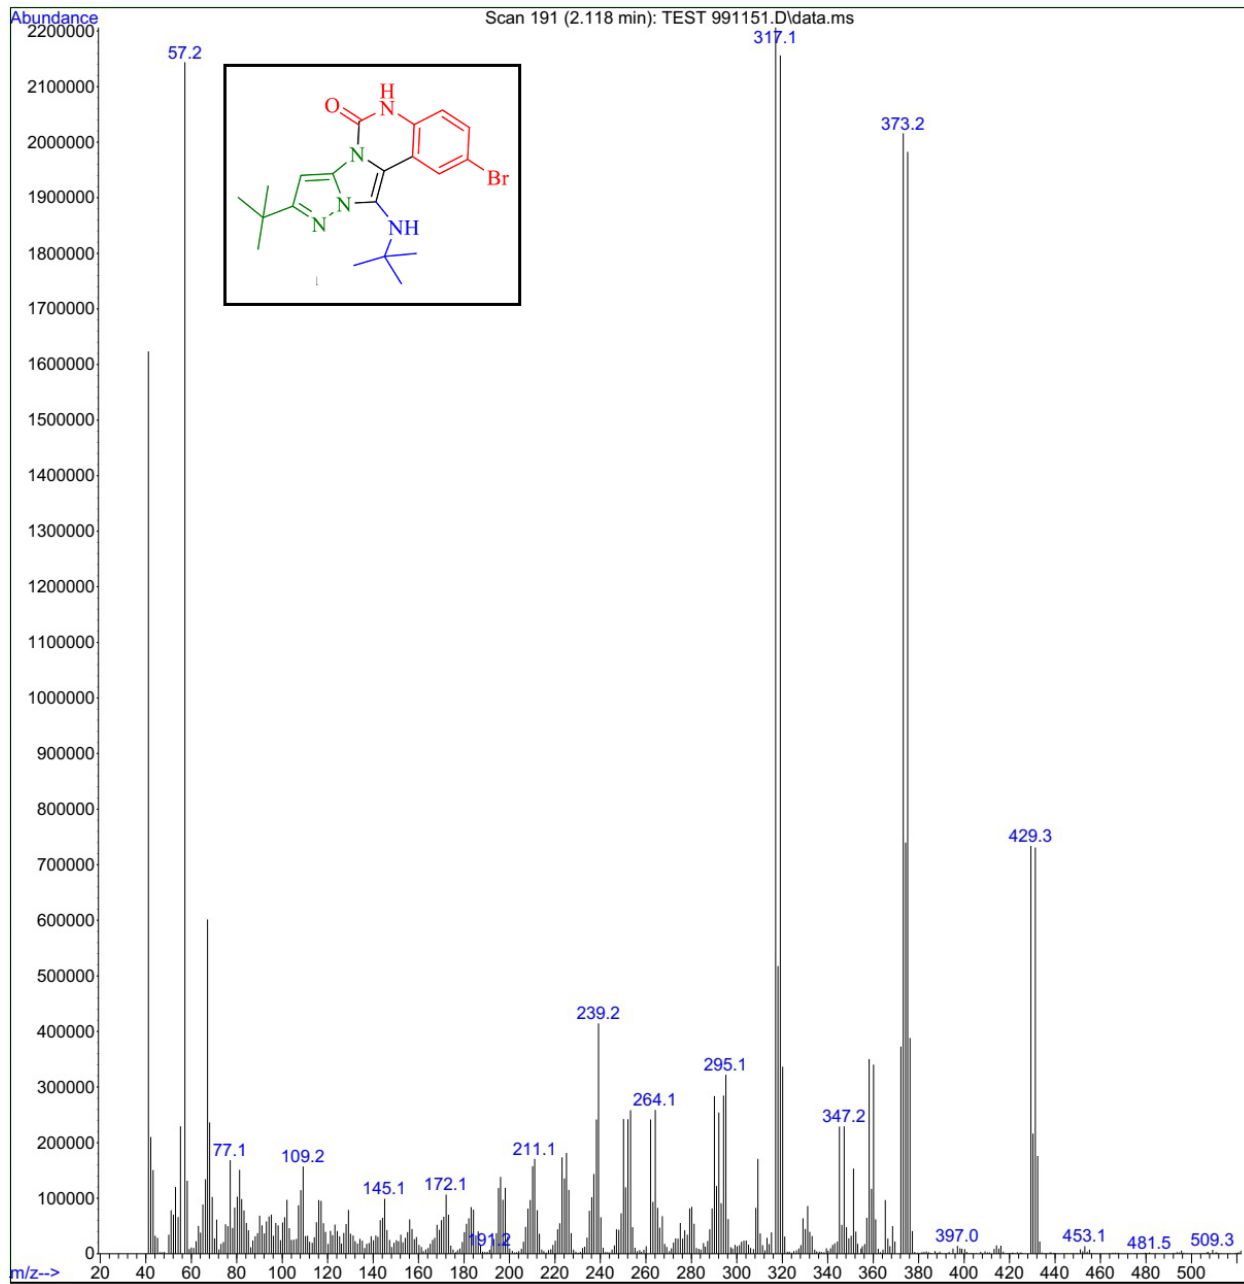

Figure S8. MASS spectrum of compound (4b).

**$^1\text{H}$  NMR,  $^{13}\text{C}$  NMR, FT-IR and MASS of compound (4c)**

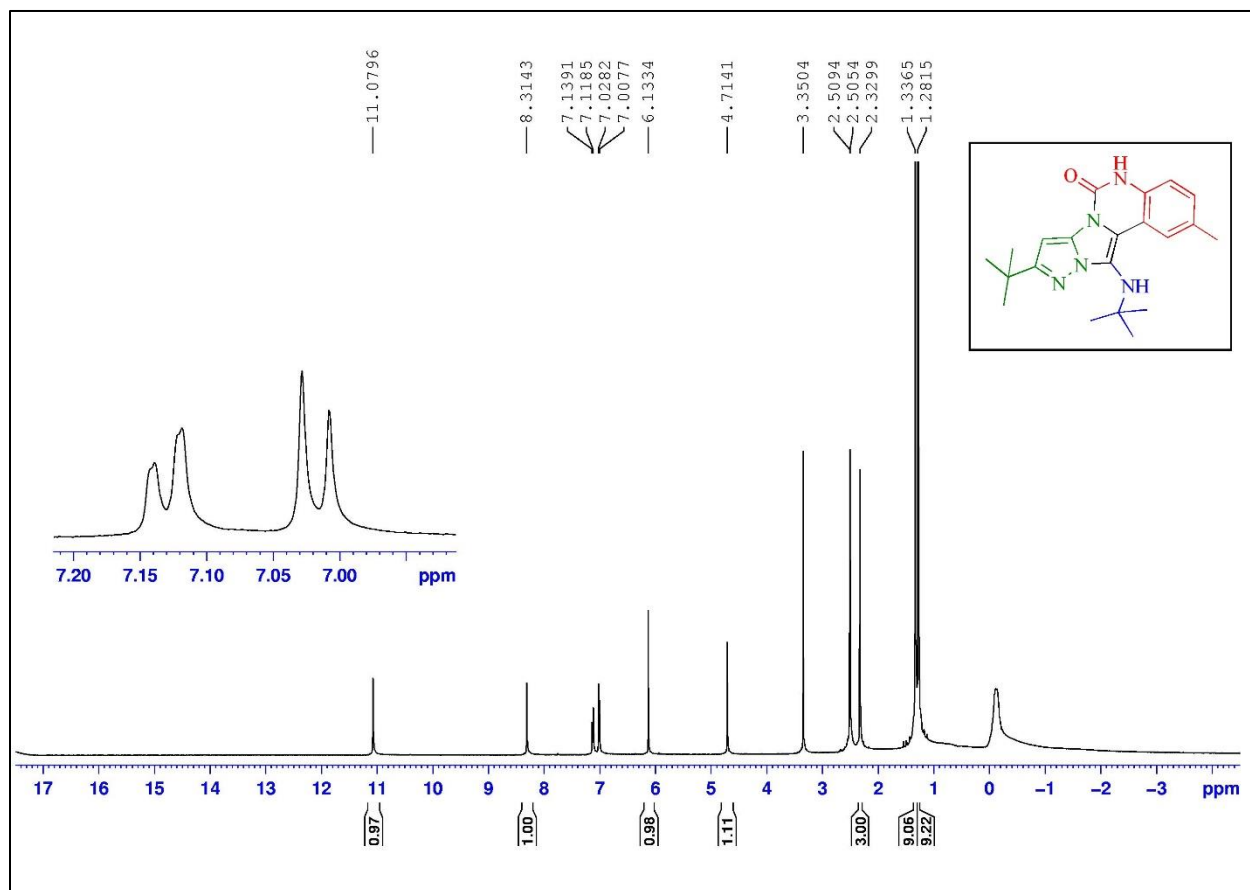

**Figure S9.**  $^1\text{H}$  NMR spectrum of compound (4c) in DMSO.

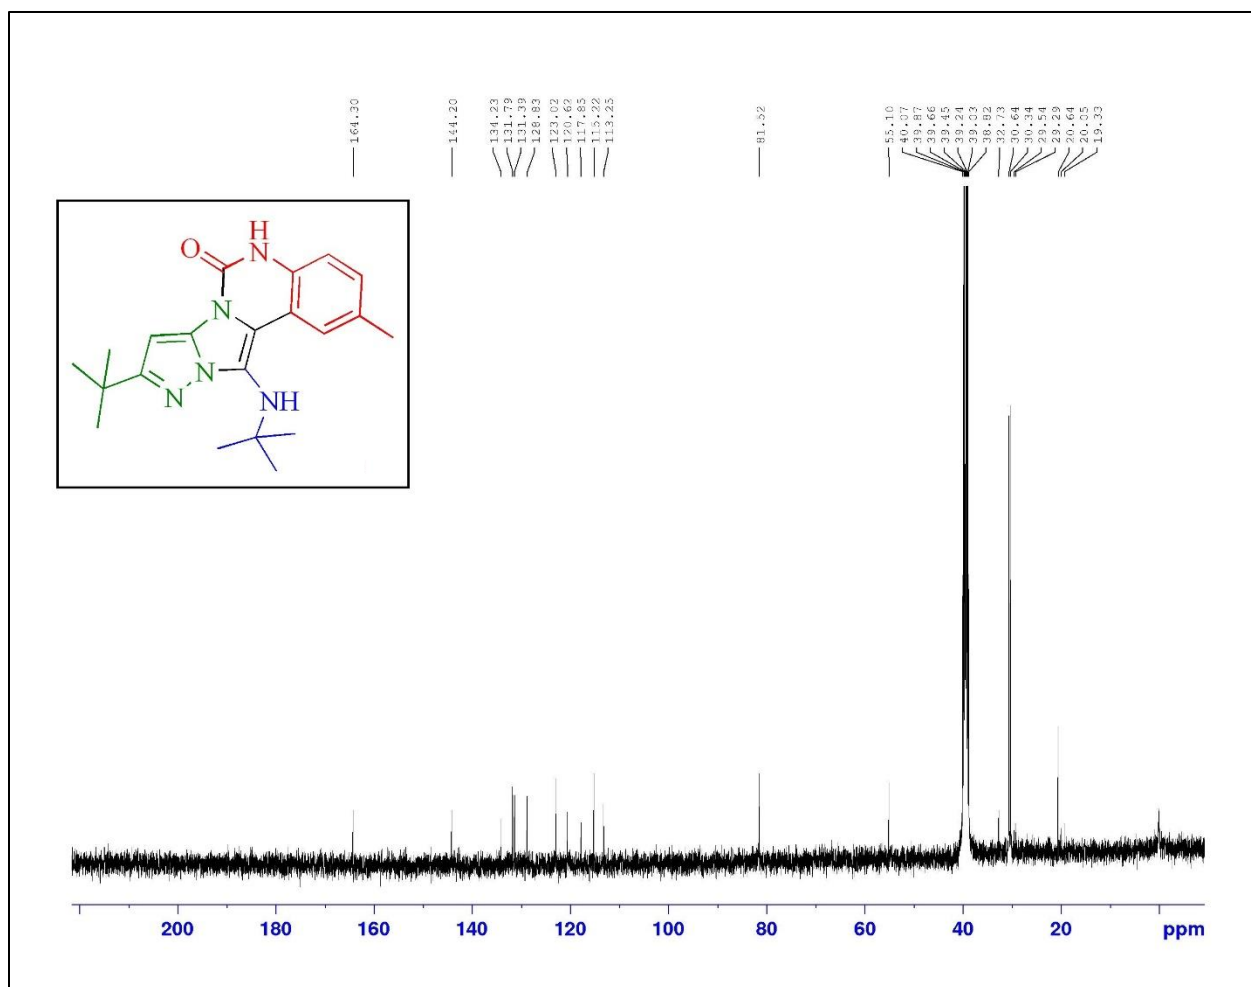

Figure S10.  $^{13}\text{C}$  NMR spectrum of compound (4c) in DMSO.

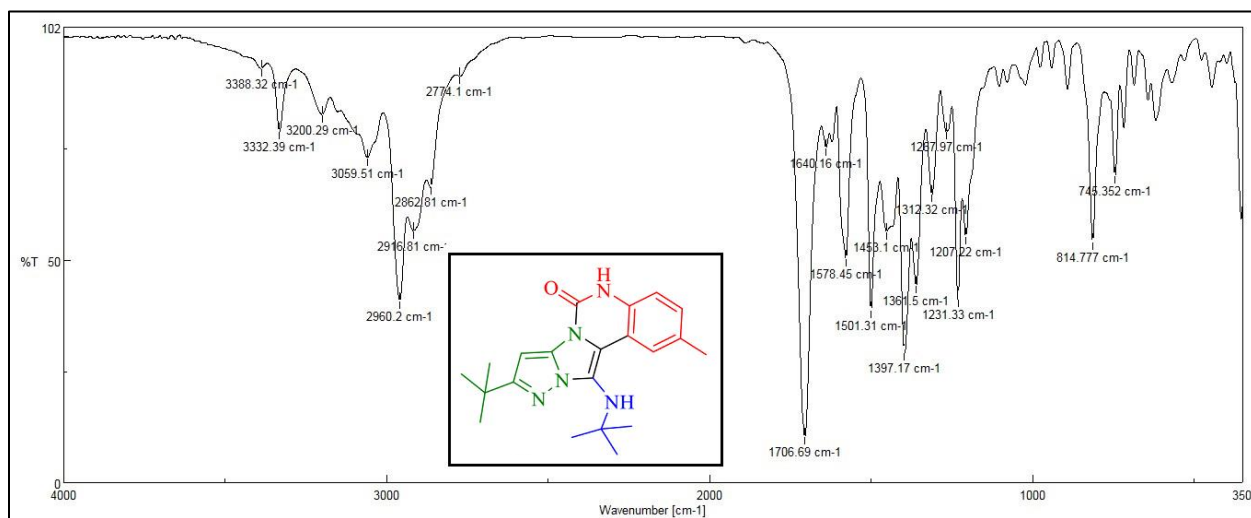

Figure S11. FT-IR spectrum of compound (4c).

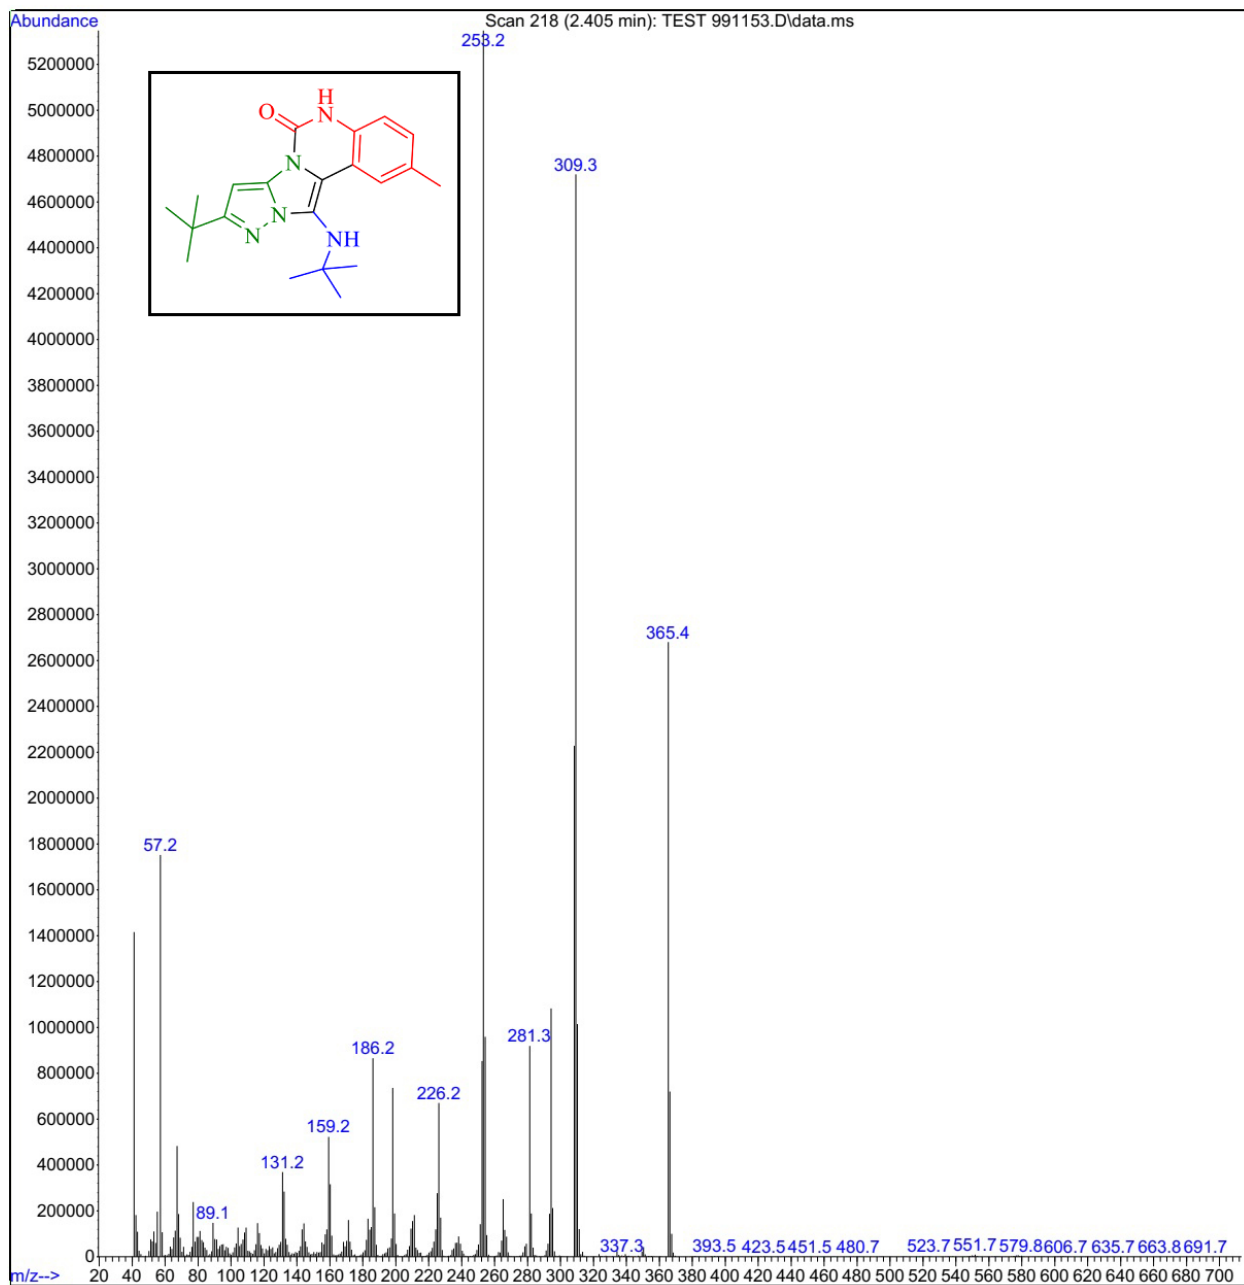

Figure S12. MASS spectrum of compound (4c).

**<sup>1</sup>H NMR, <sup>13</sup>C NMR, FT-IR and MASS of compound (4d)**

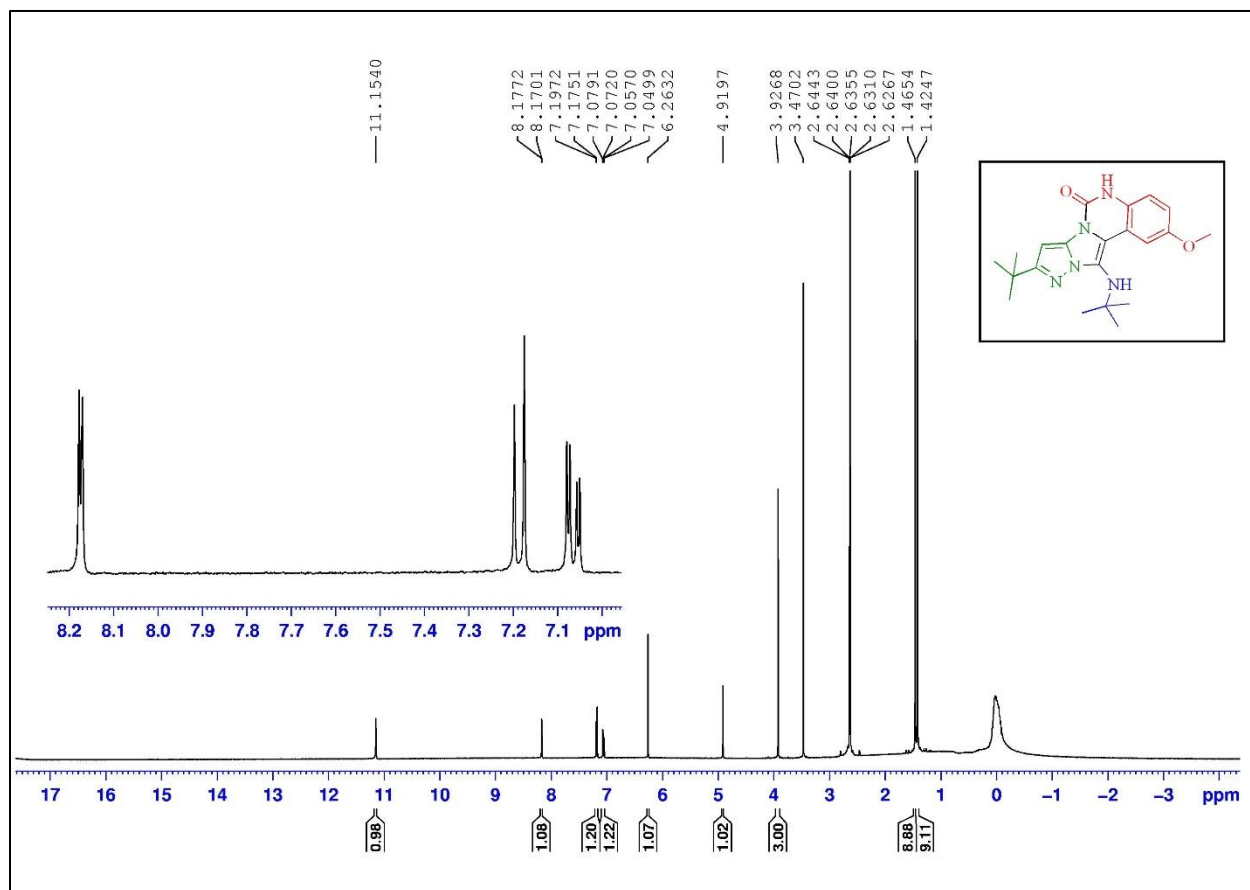

**Figure S13.** <sup>1</sup>H NMR spectrum of compound (4d) in DMSO.



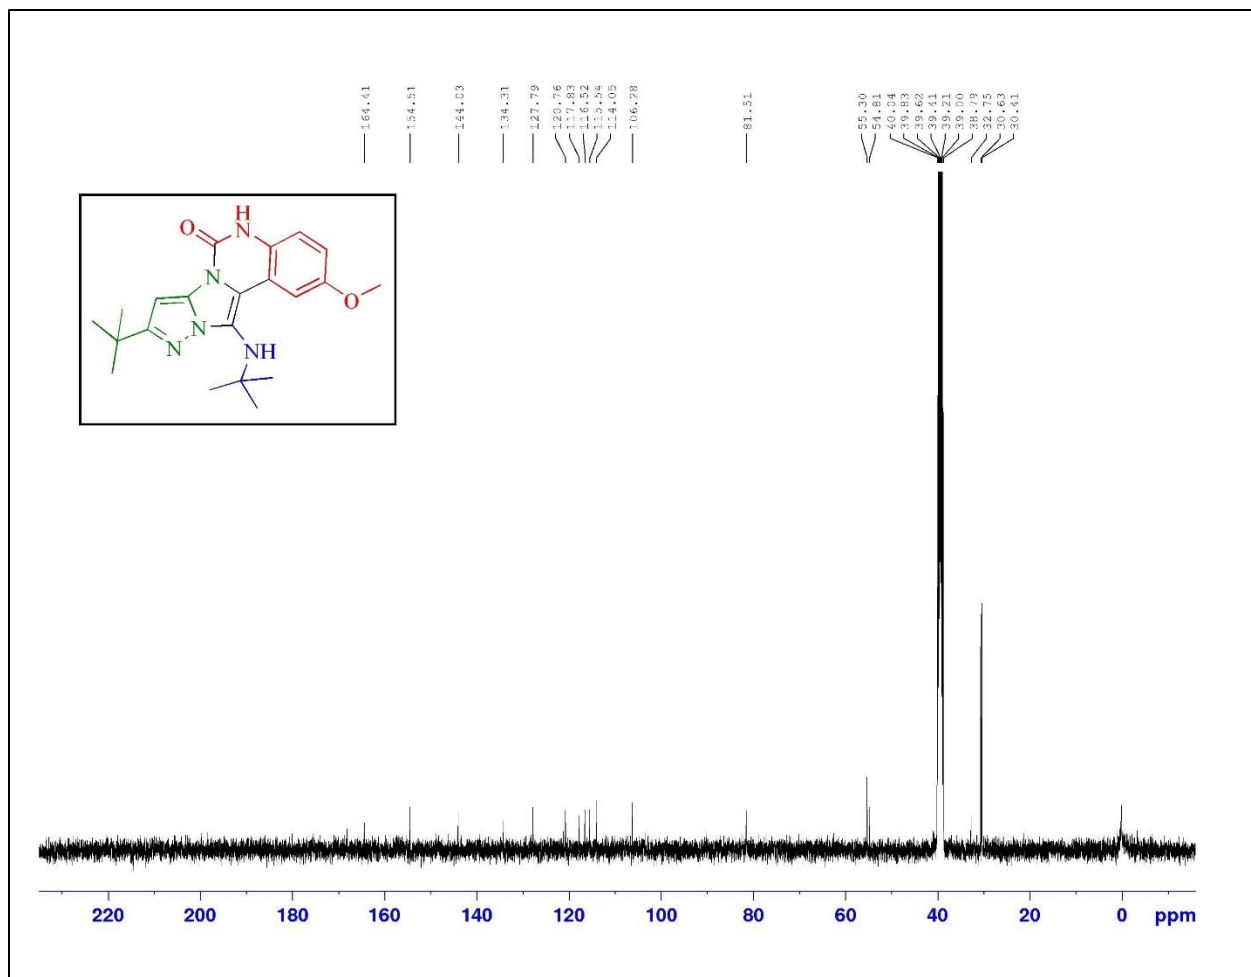

Figure S14. <sup>13</sup>C NMR spectrum of compound (4d) in DMSO.

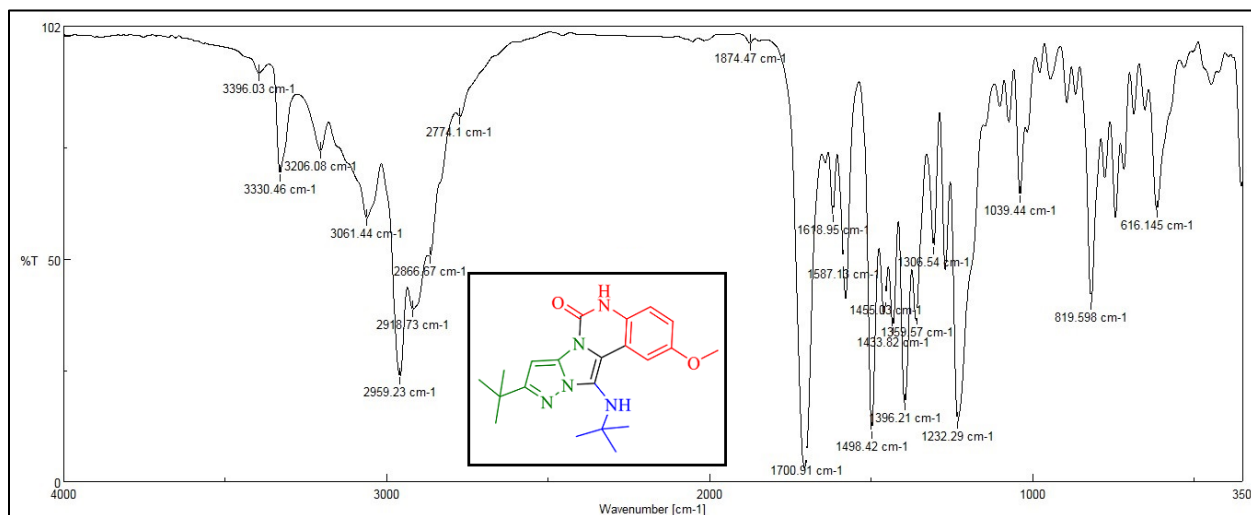

Figure S15. FT-IR spectrum of compound (4d).

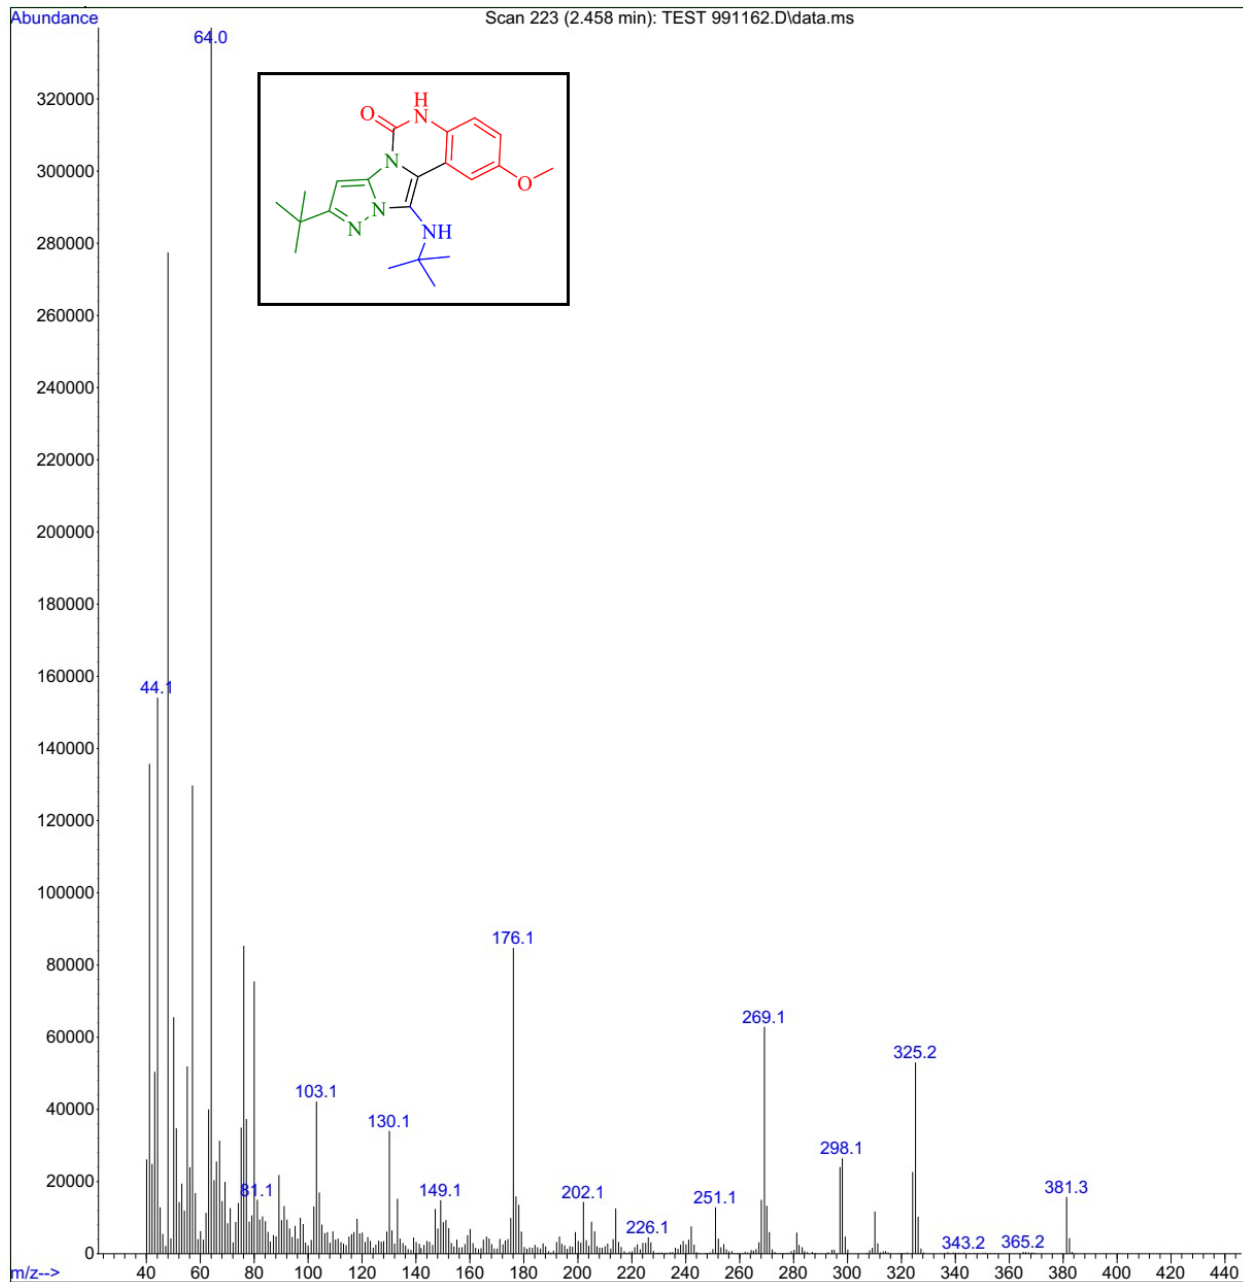

Figure S16. MASS spectrum of compound (4d).

**$^1\text{H}$  NMR,  $^{13}\text{C}$  NMR, FT-IR and MASS of compound (4e)**

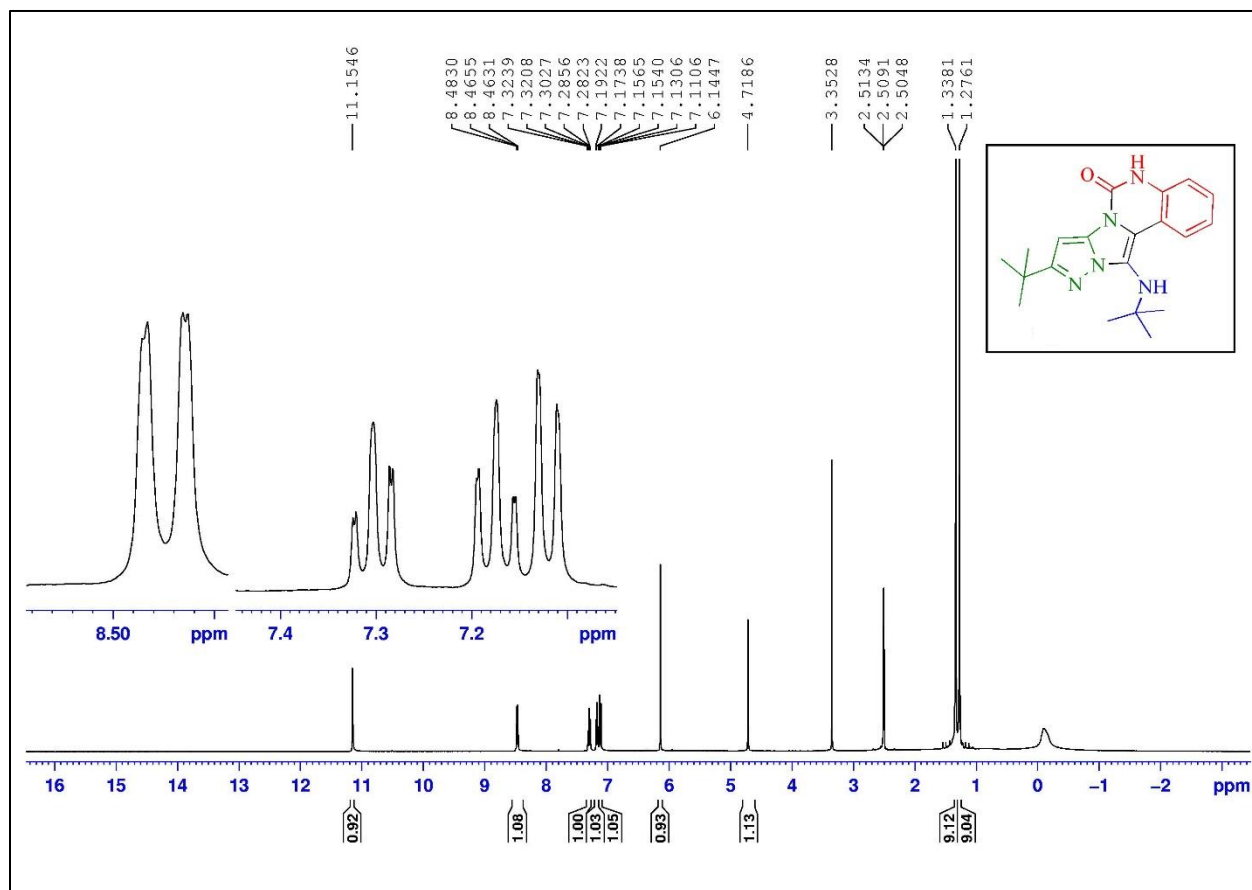

**Figure S17.**  $^1\text{H}$  NMR spectrum of compound (4e) in DMSO.

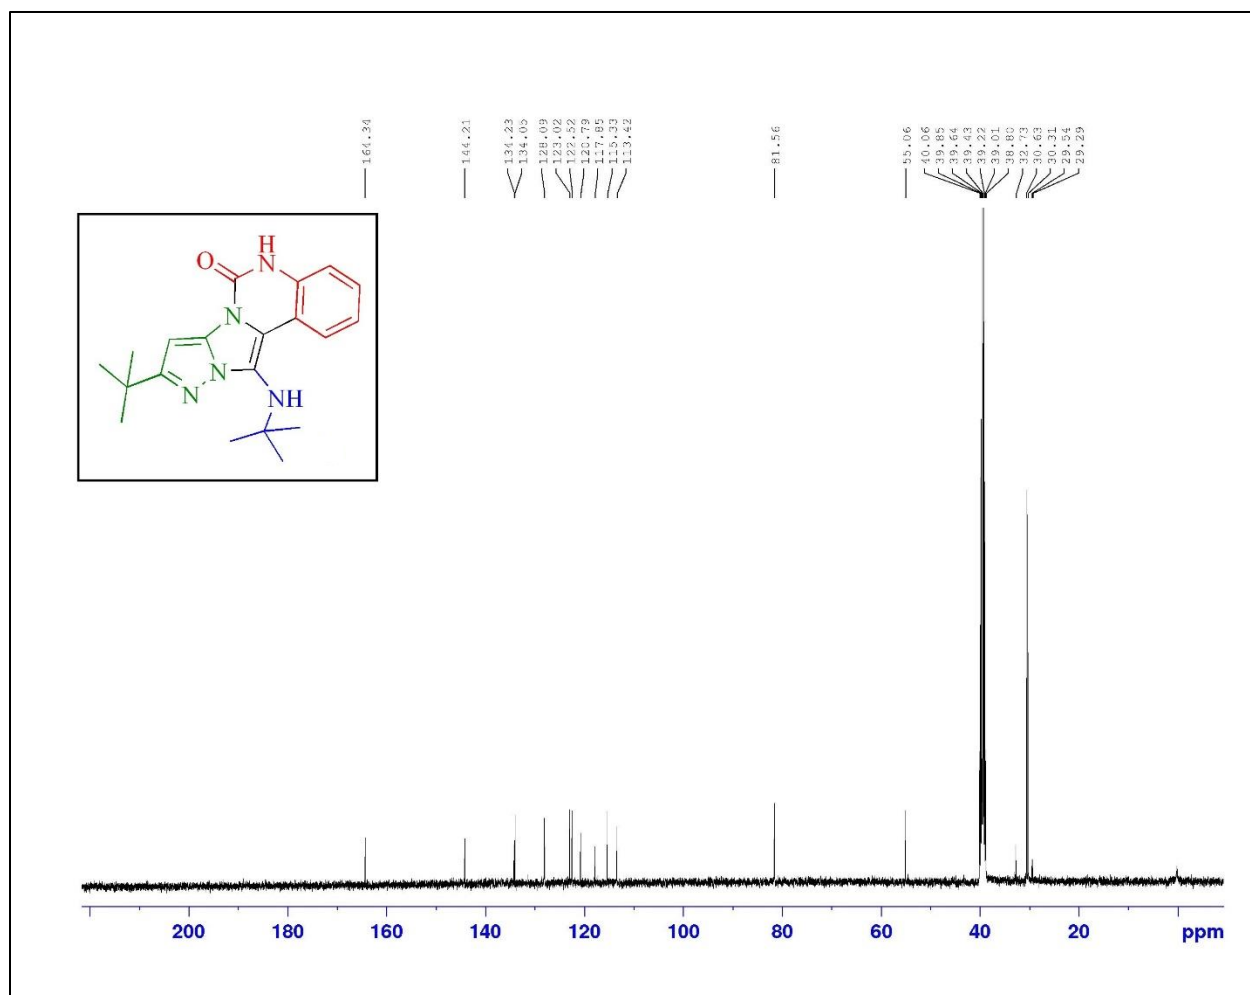

**Figure S18.**  $^{13}\text{C}$  NMR spectrum of compound (4e) in DMSO.

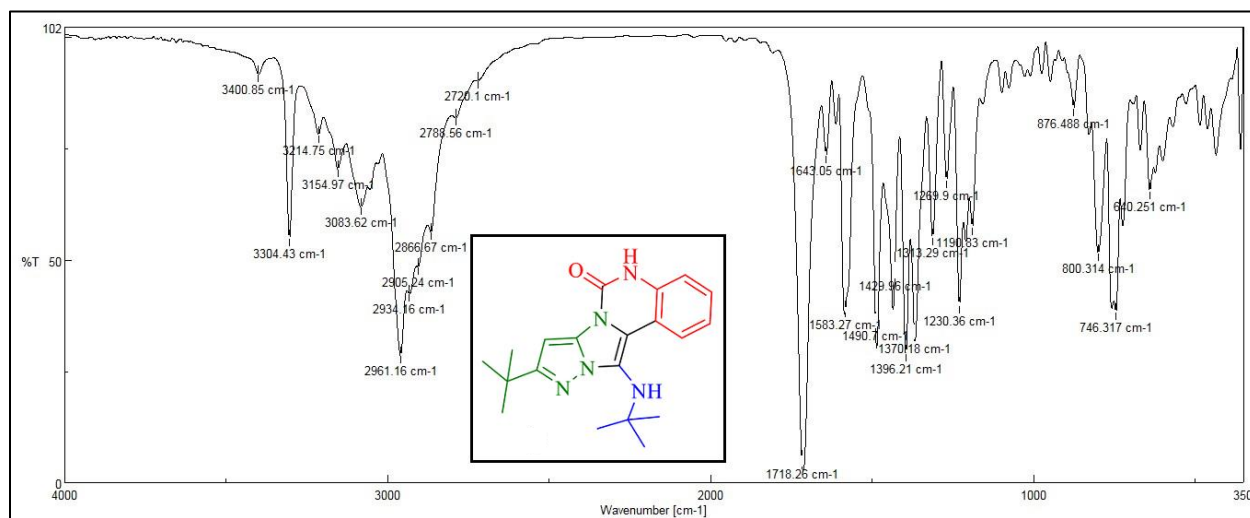

**Figure S19.** FT-IR spectrum of compound (4e).

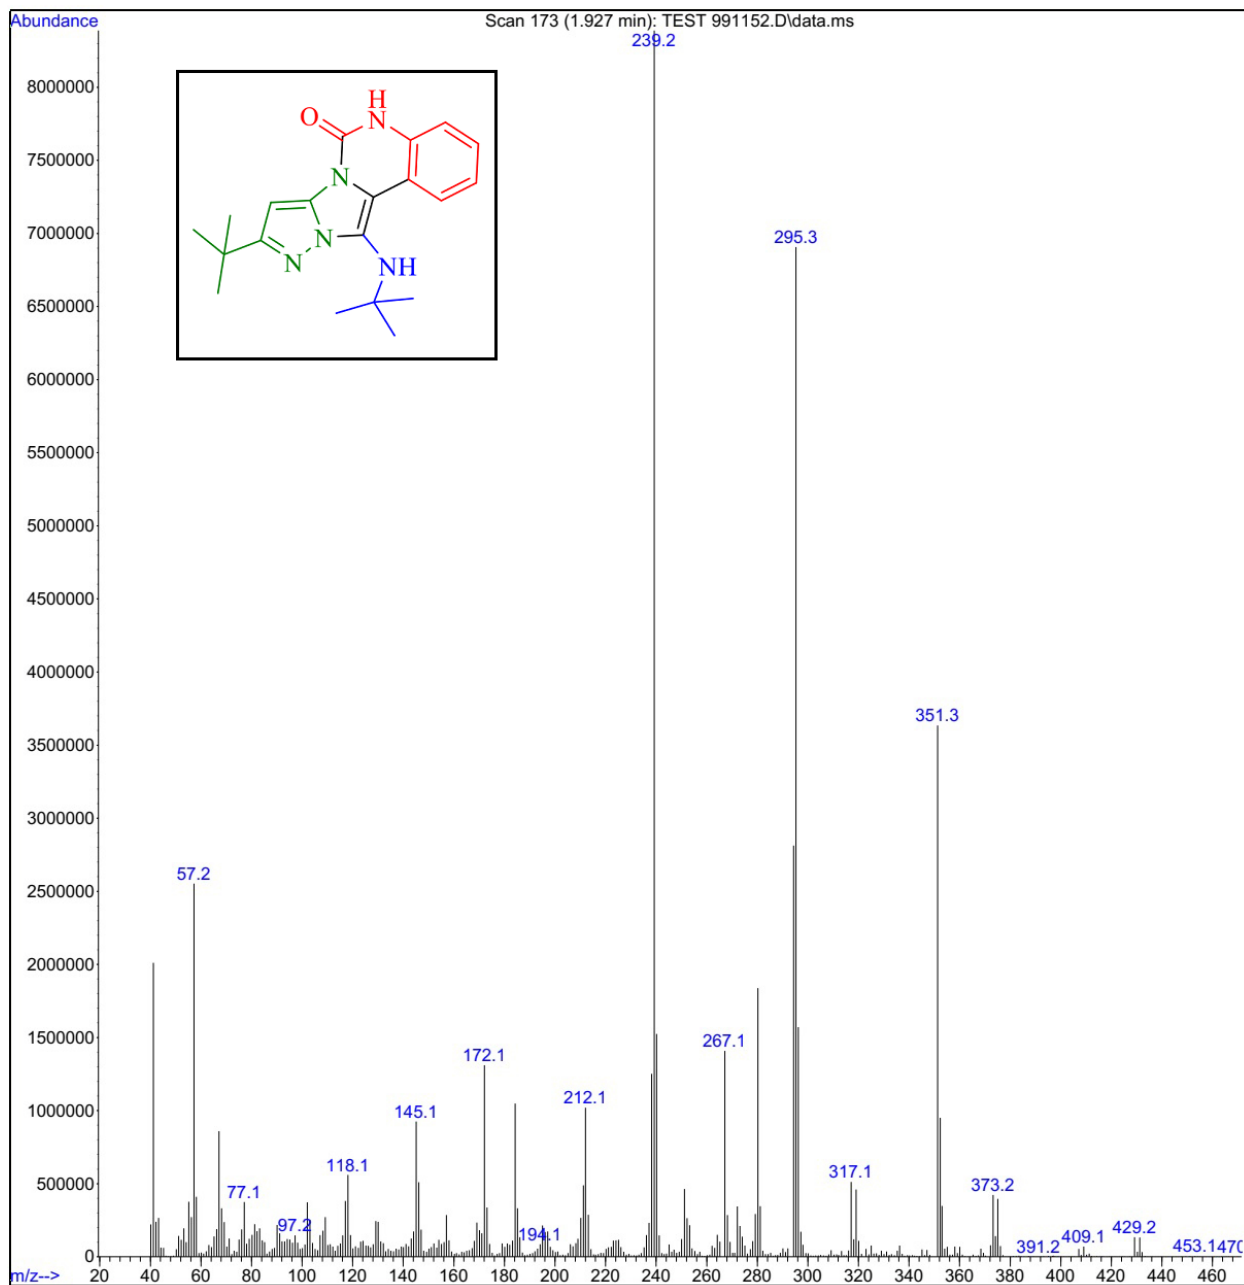

Figure S20. MASS spectrum of compound (4e).

**$^1\text{H}$  NMR,  $^{13}\text{C}$  NMR, FT-IR and MASS of compound (4f)**

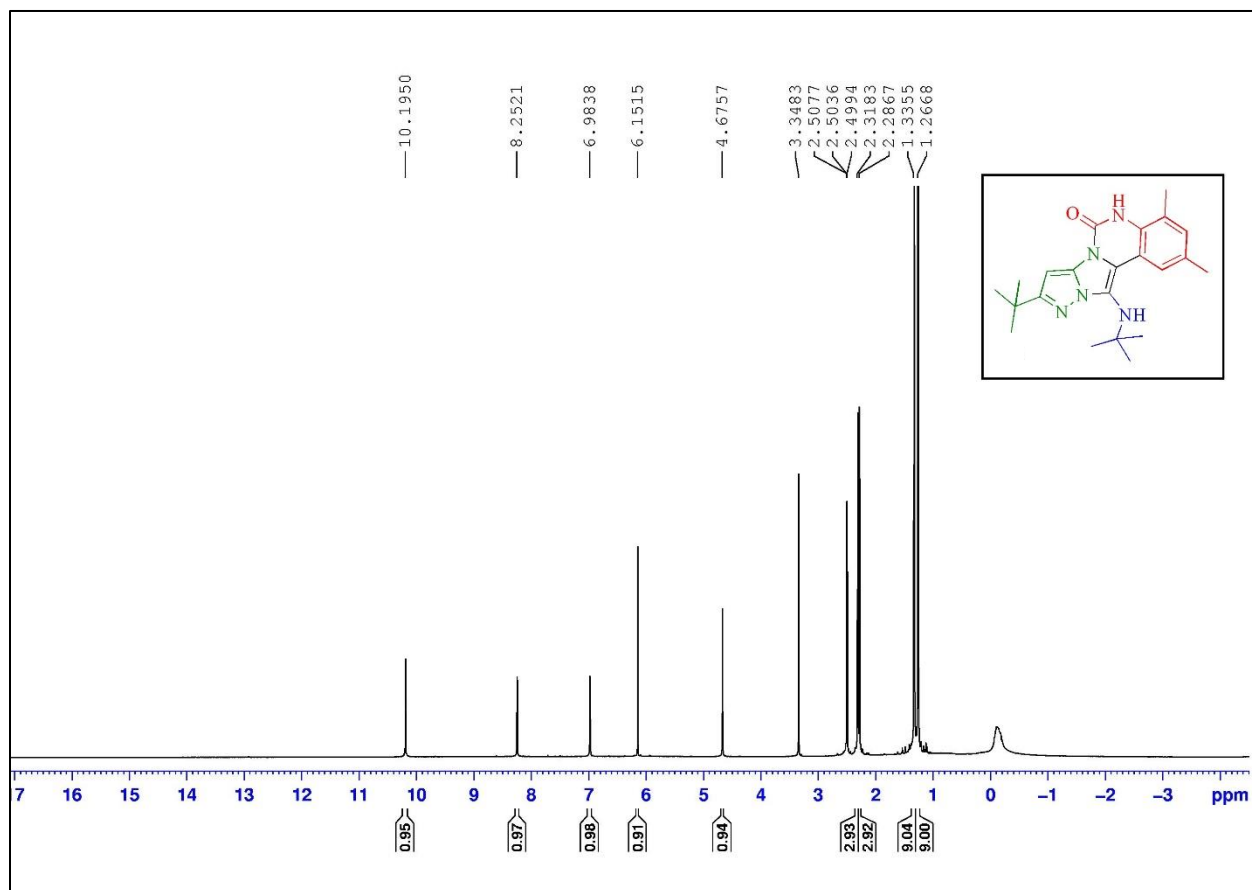

**Figure S21.**  $^1\text{H}$  NMR spectrum of compound (4f) in DMSO.

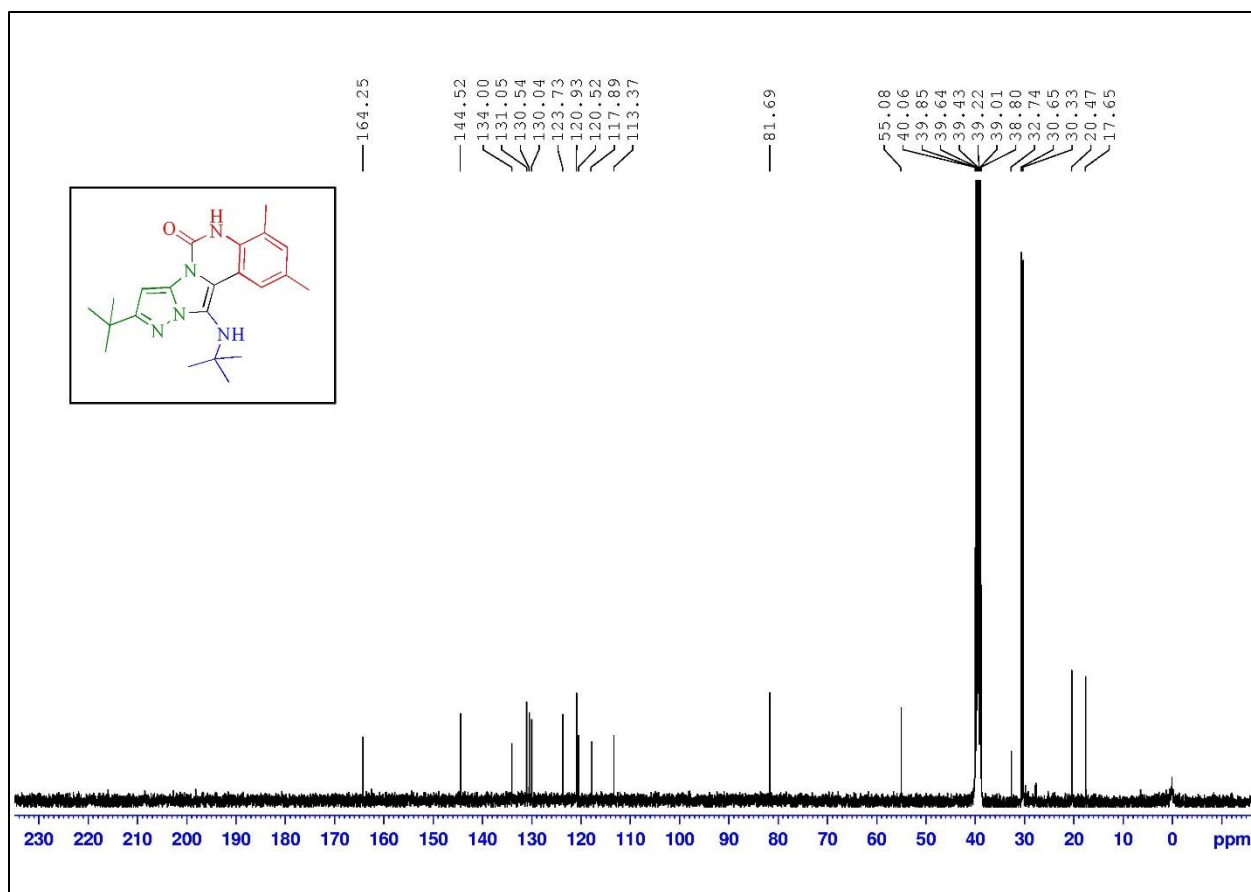

Figure S22. <sup>13</sup>C NMR spectrum of compound (4f) in DMSO.

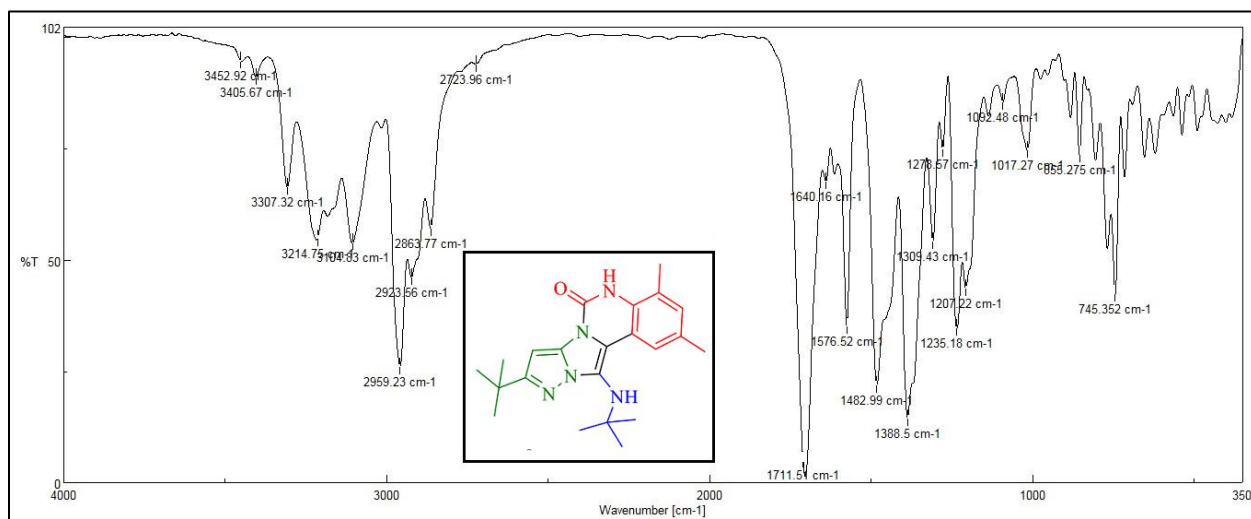

Figure S23. FT-IR spectrum of compound (4f).

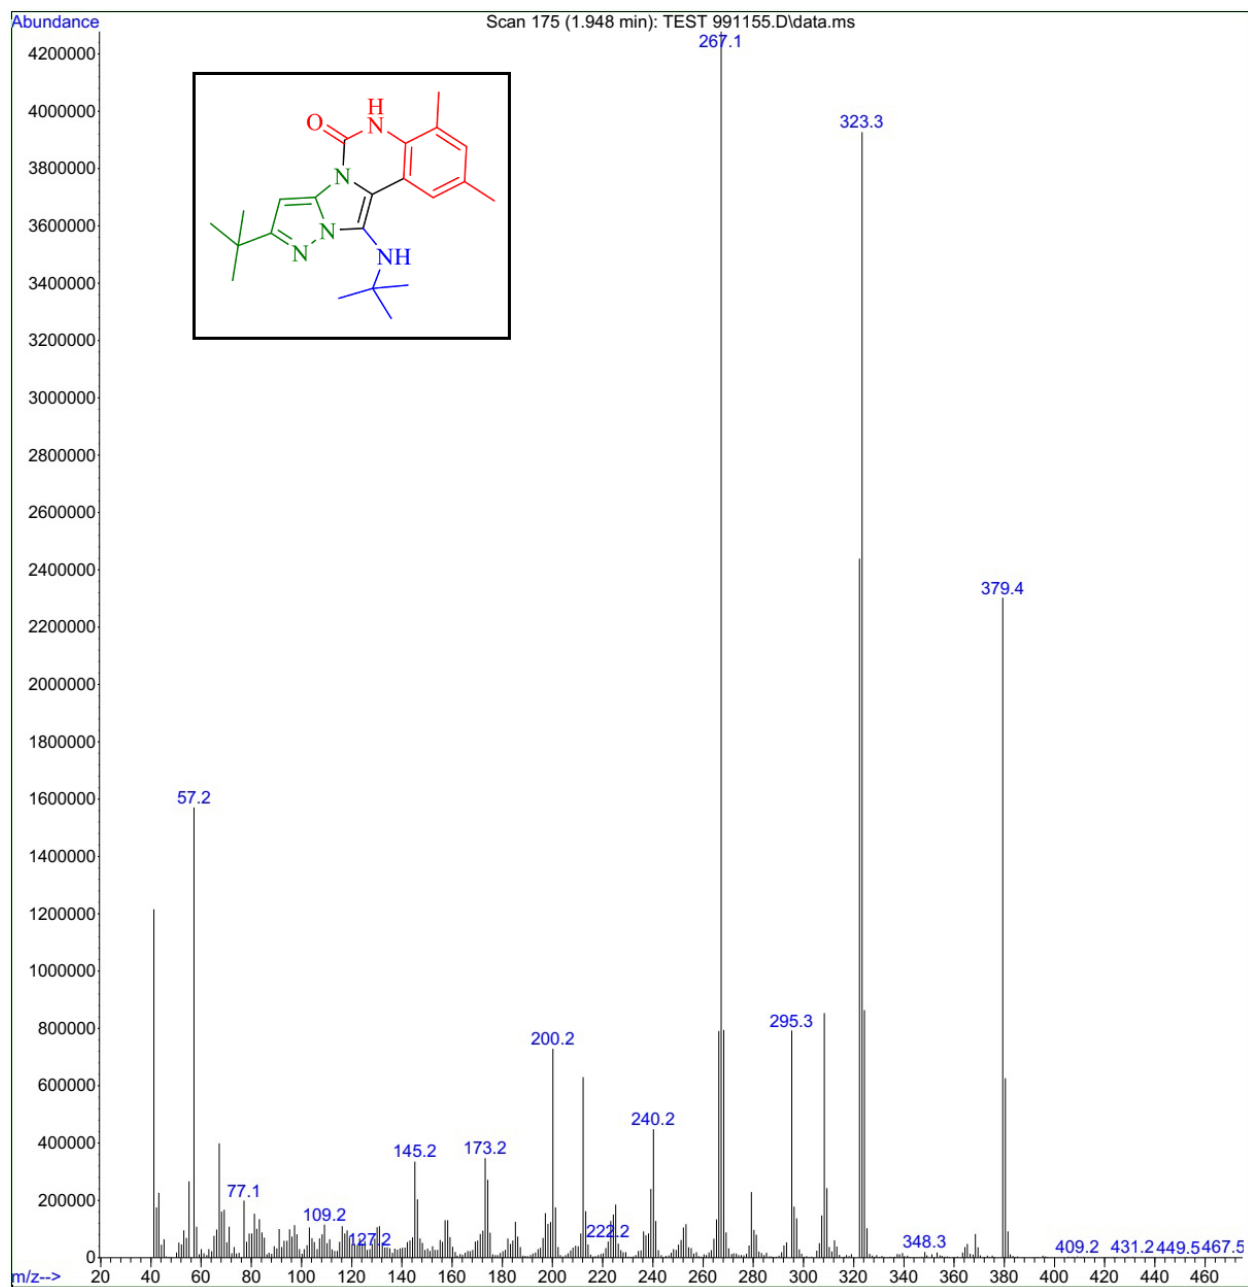

Figure S24. MASS spectrum of compound (4f).

$^1\text{H}$  NMR,  $^{13}\text{C}$  NMR, FT-IR and MASS of compound (4g)



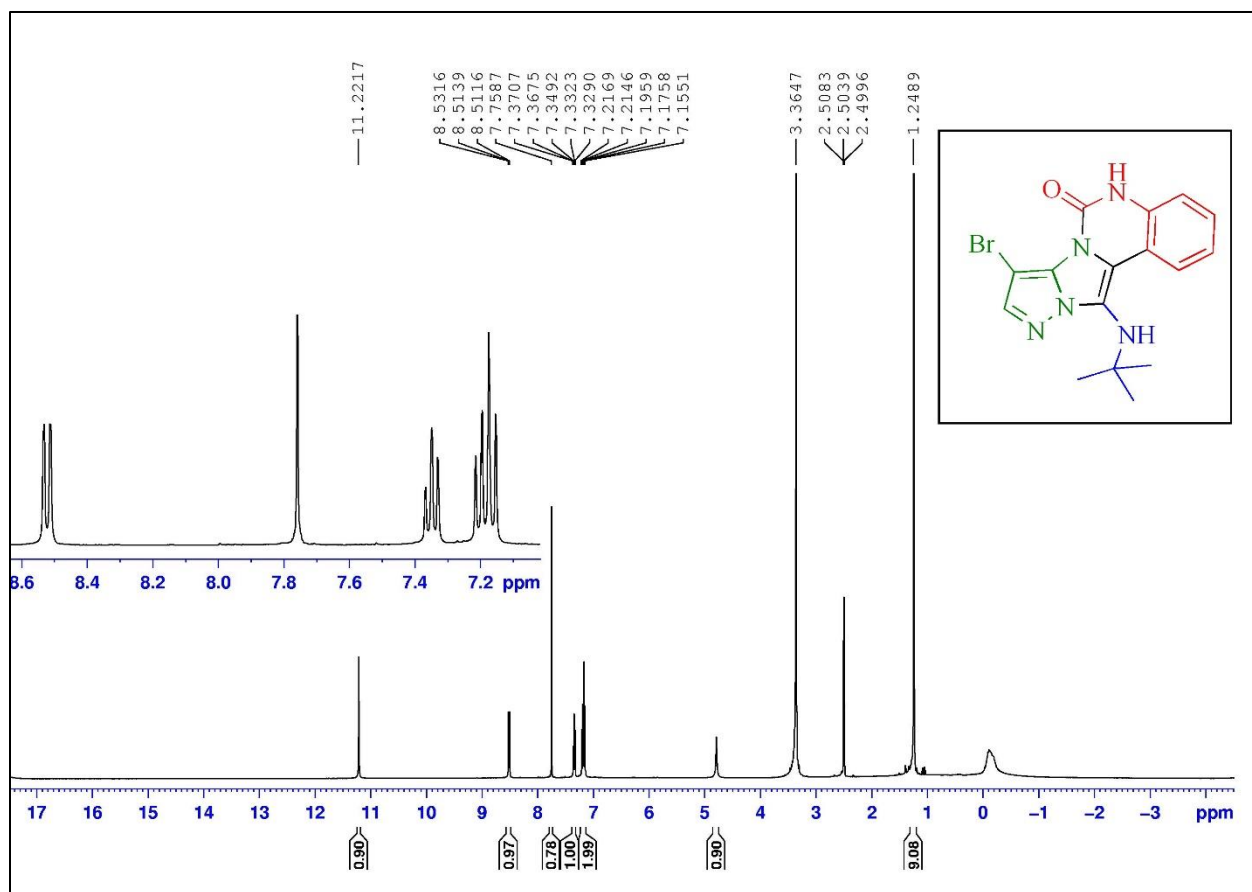

Figure S25.  $^1\text{H}$  NMR spectrum of compound (4g) in DMSO.

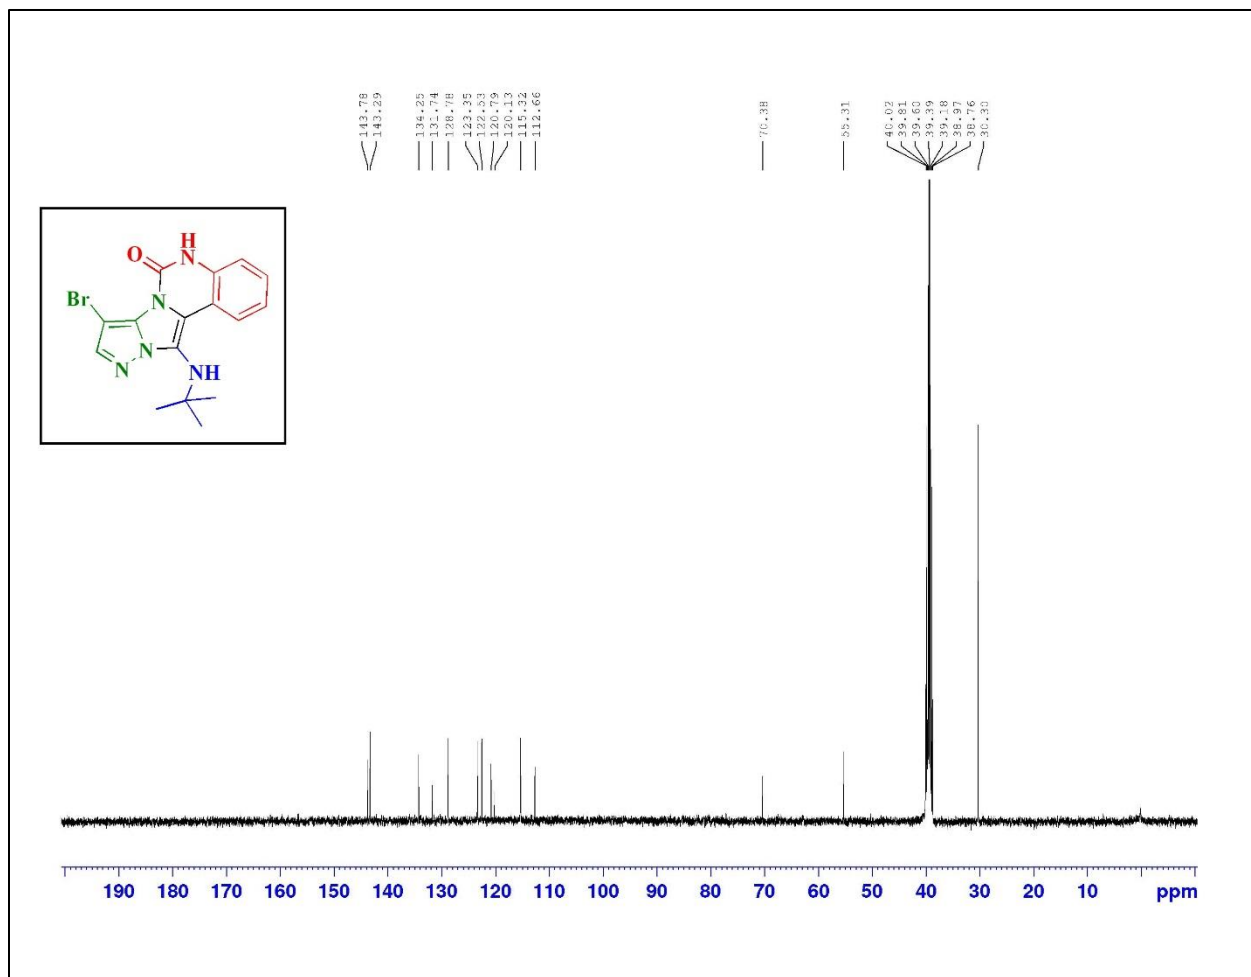

Figure S26.  $^{13}\text{C}$  NMR spectrum of compound (4g) in DMSO.

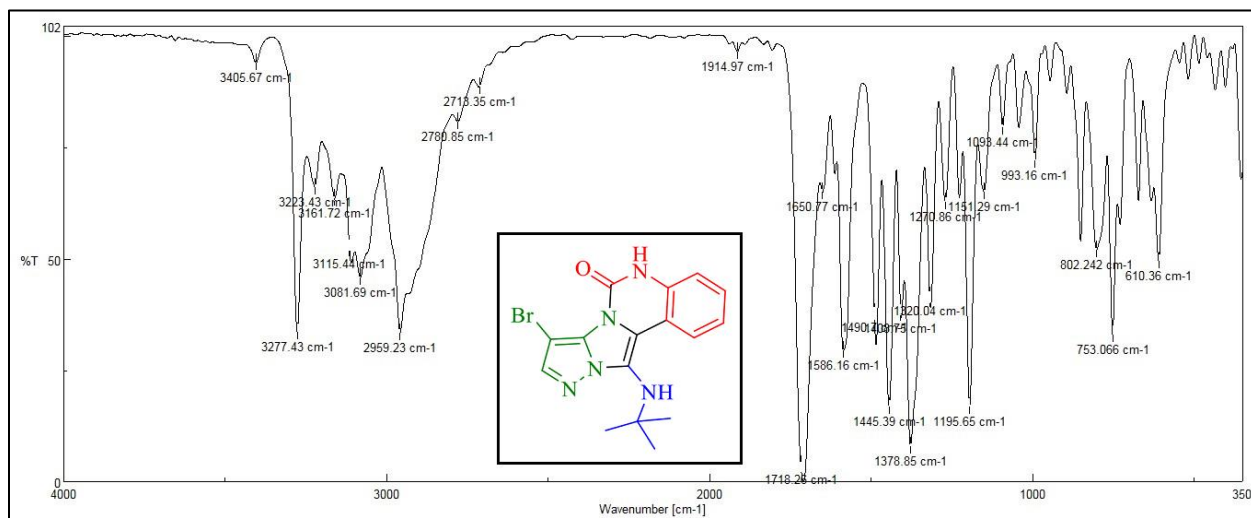

Figure S27. FT-IR spectrum of compound (4g).

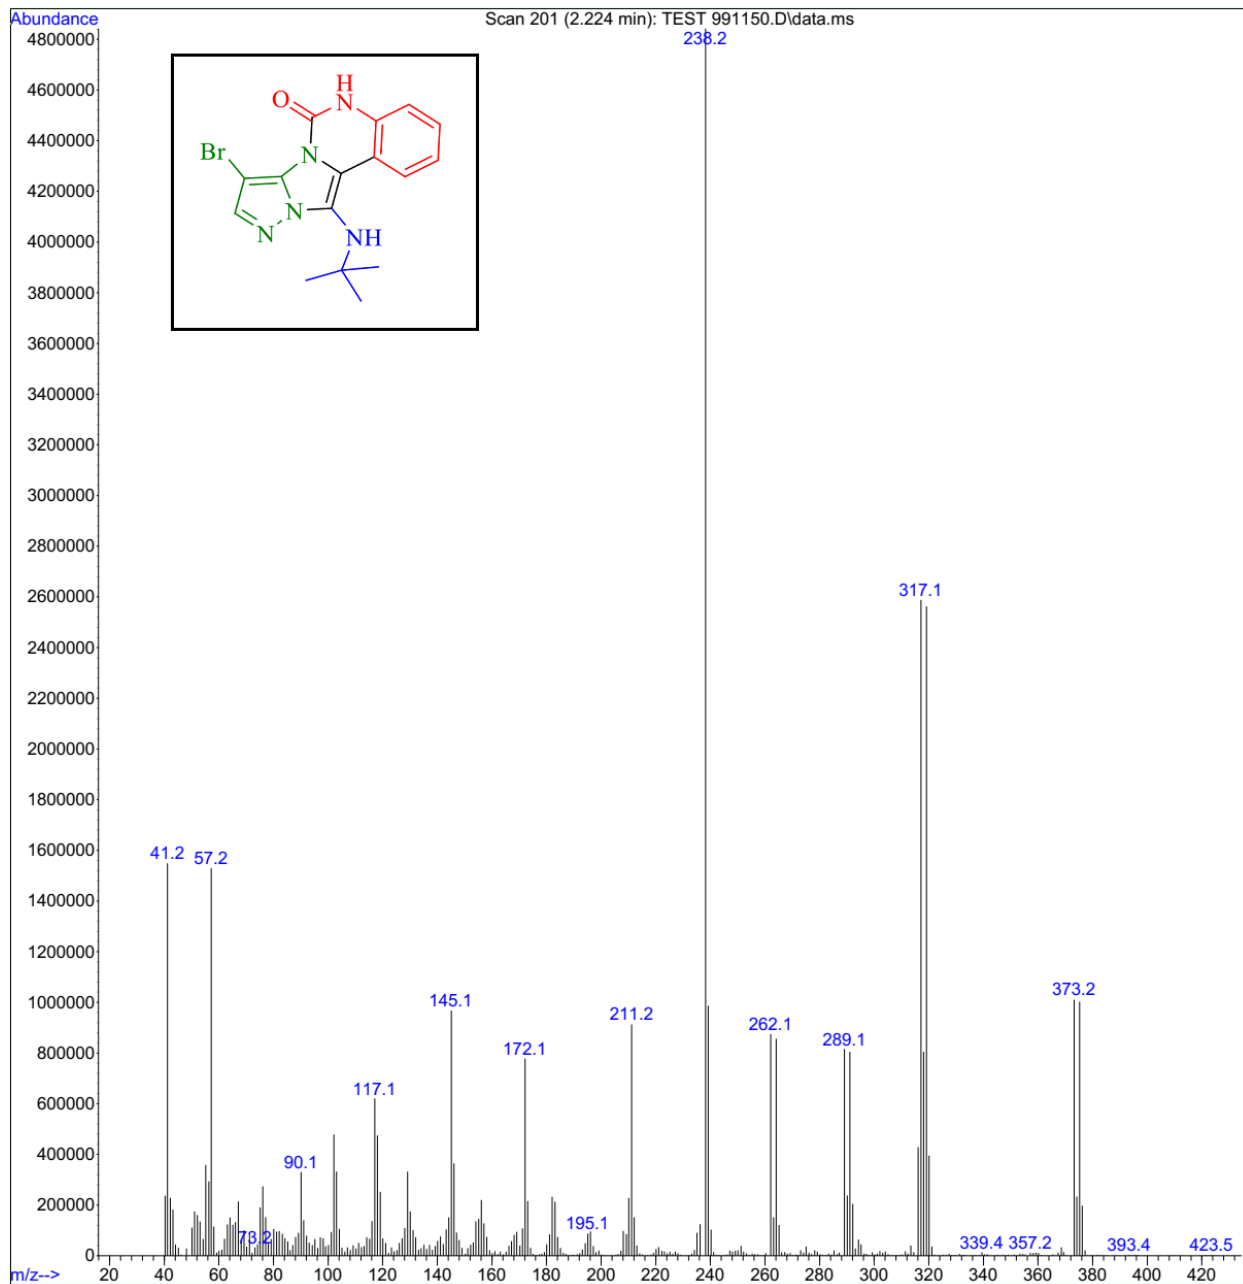

Figure S28. MASS spectrum of compound (4g).

**$^1\text{H}$  NMR,  $^{13}\text{C}$  NMR, FT-IR and MASS of compound (4h)**

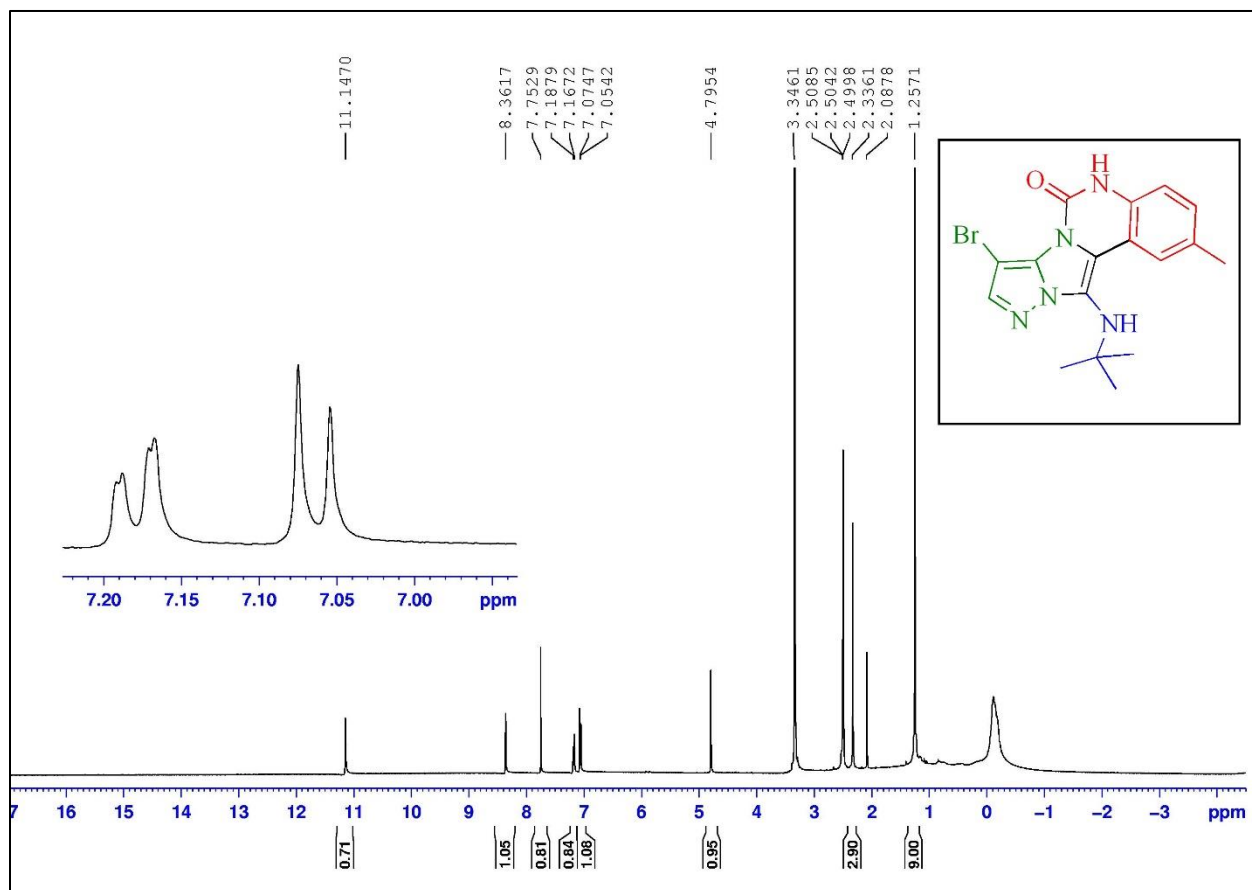

**Figure S29.**  $^1\text{H}$  NMR spectrum of compound (4h) in DMSO.

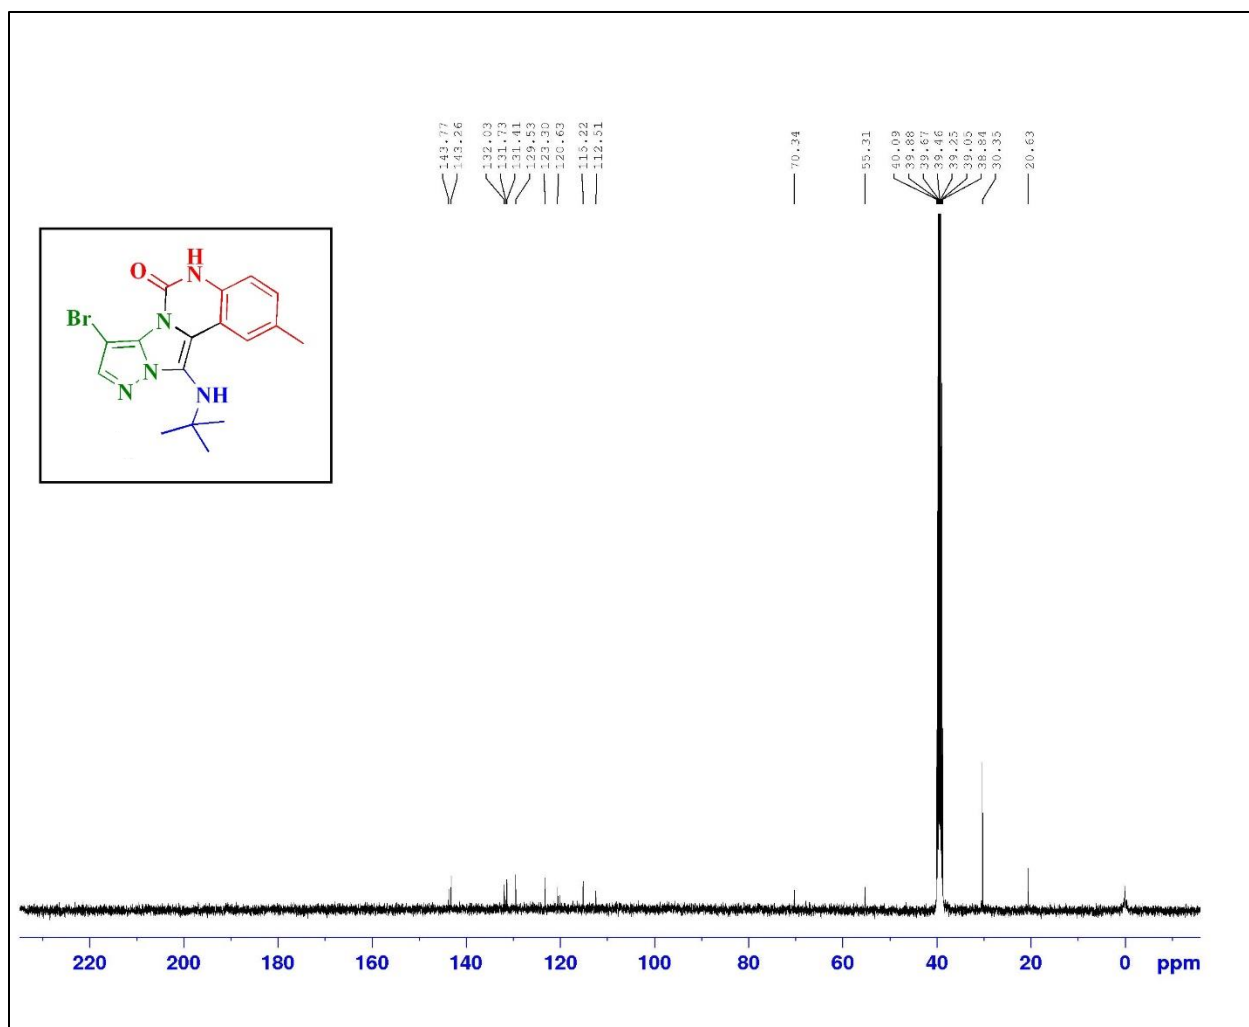

Figure S30.  $^{13}\text{C}$  NMR spectrum of compound (4h) in DMSO.

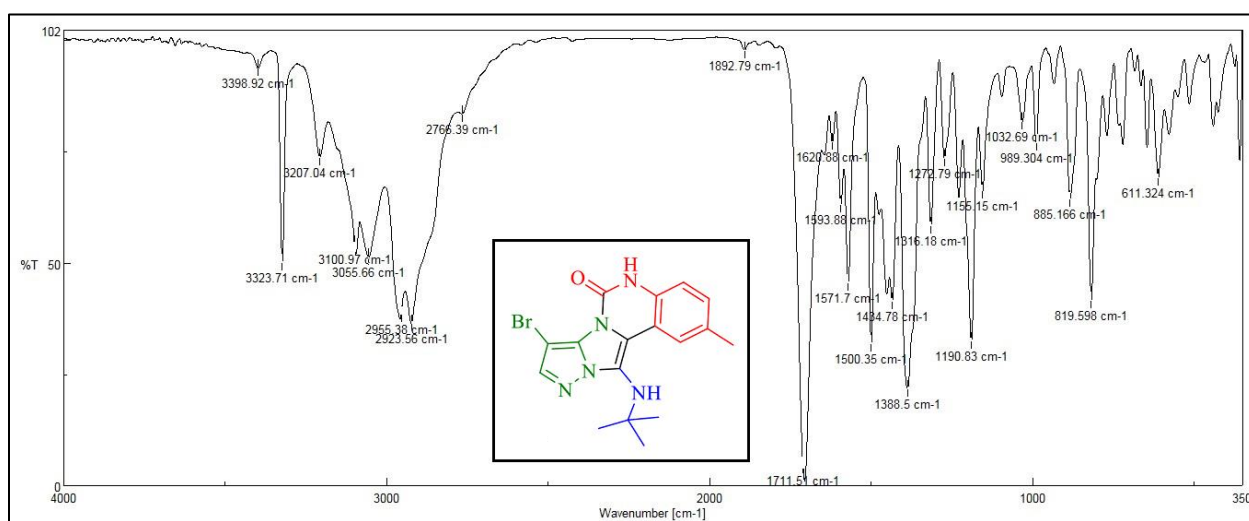

Figure S31. FT-IR spectrum of compound (4h).

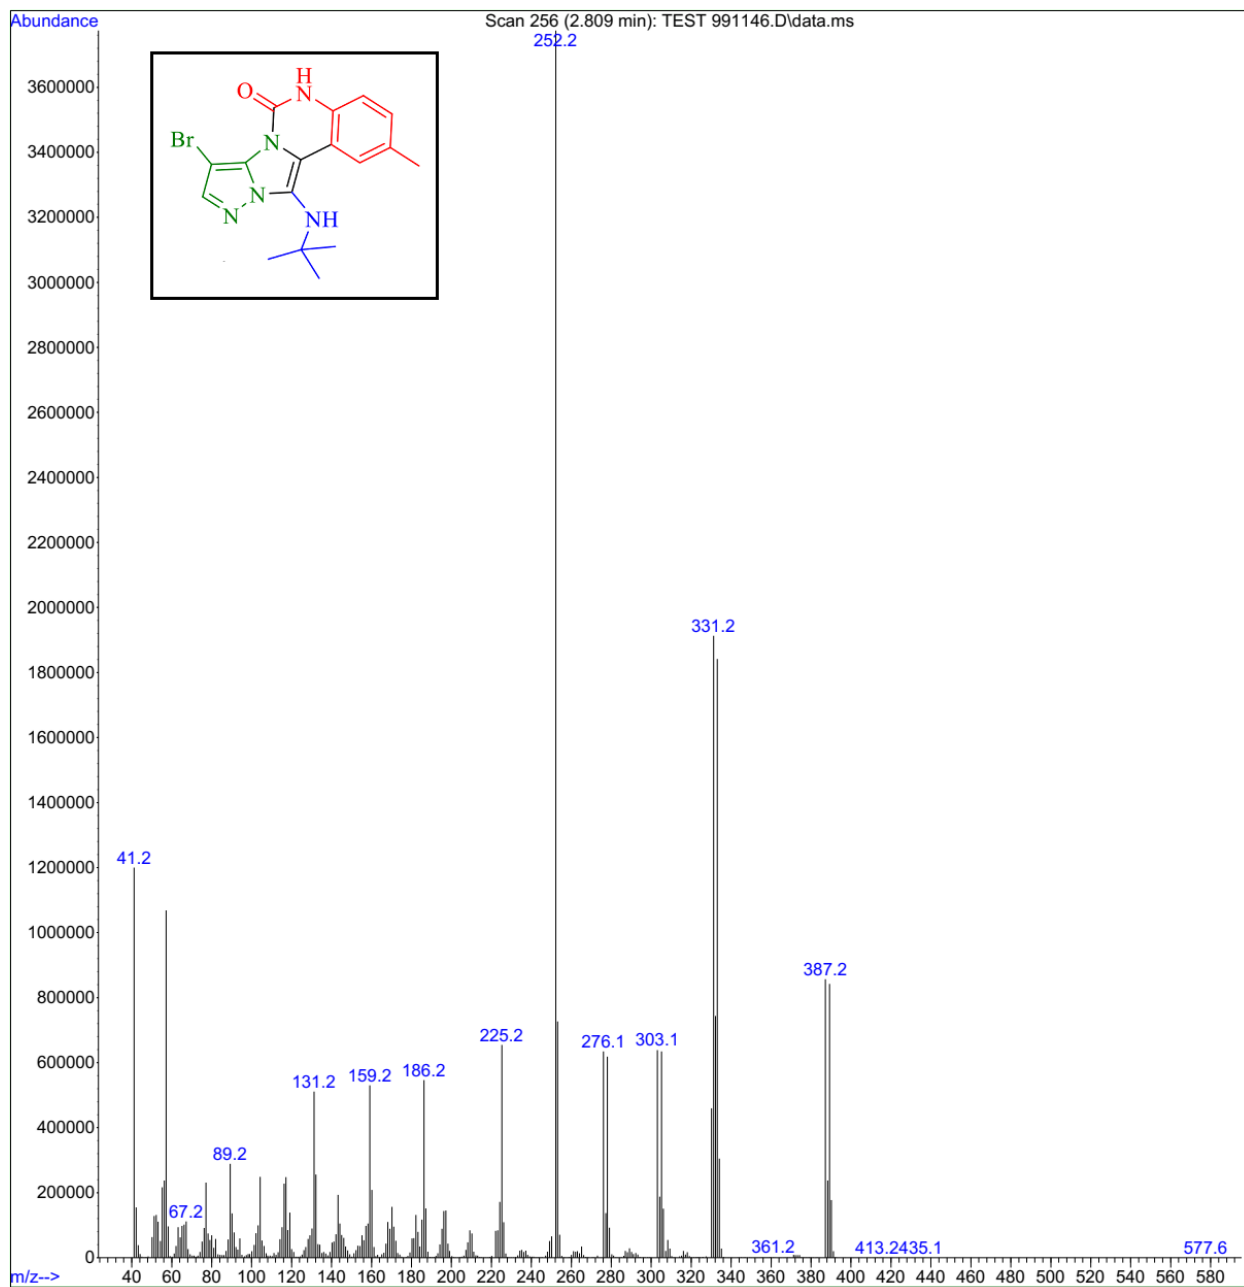

Figure S32. MASS spectrum of compound (4h).

$^1\text{H}$  NMR,  $^{13}\text{C}$  NMR, FT-IR and MASS of compound (4i)

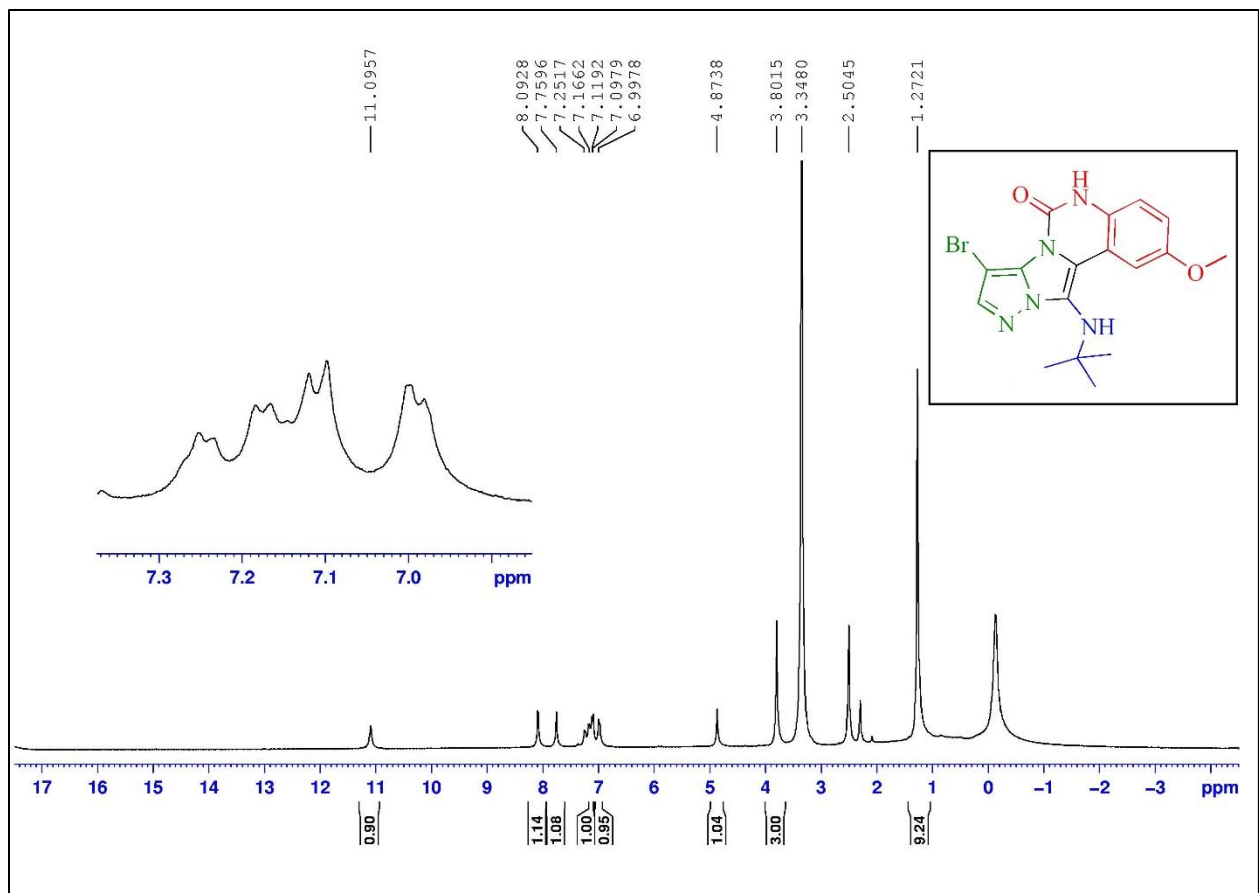

Figure S33. <sup>1</sup>H NMR spectrum of compound (4i) in DMSO.

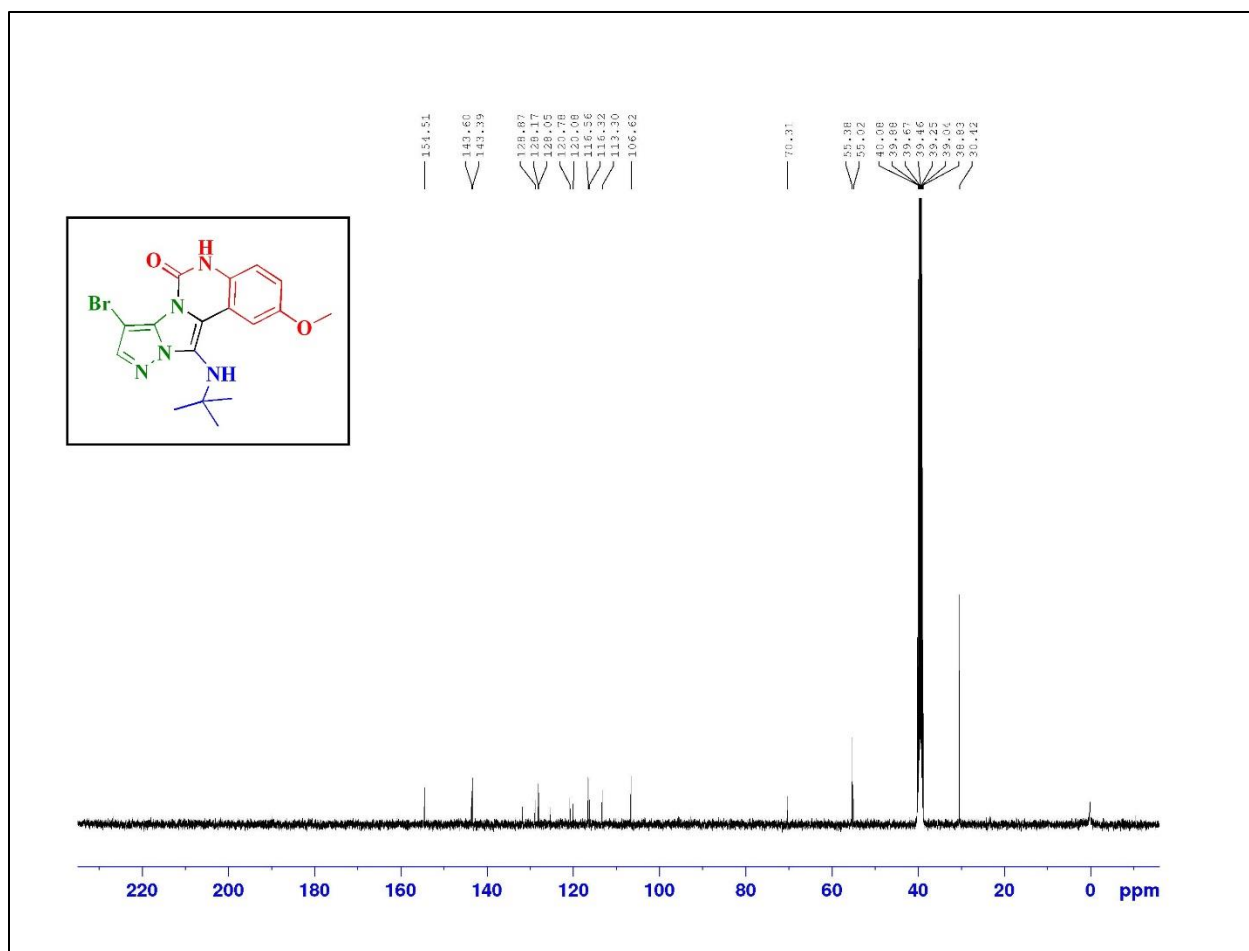

Figure S34.  $^{13}\text{C}$  NMR spectrum of compound (4i) in DMSO.

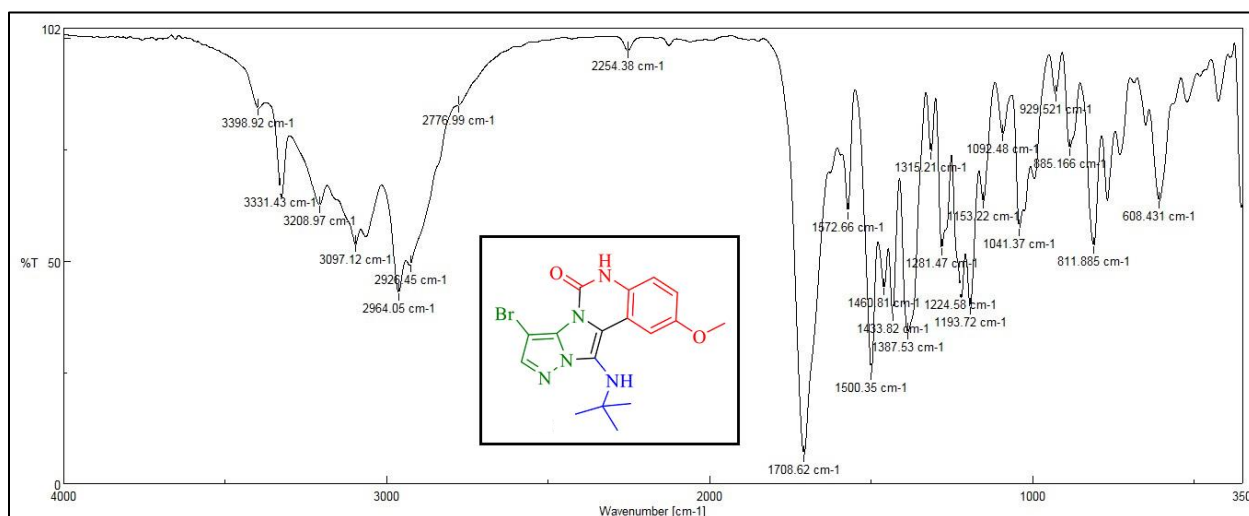

Figure S35. FT-IR spectrum of compound (4i).



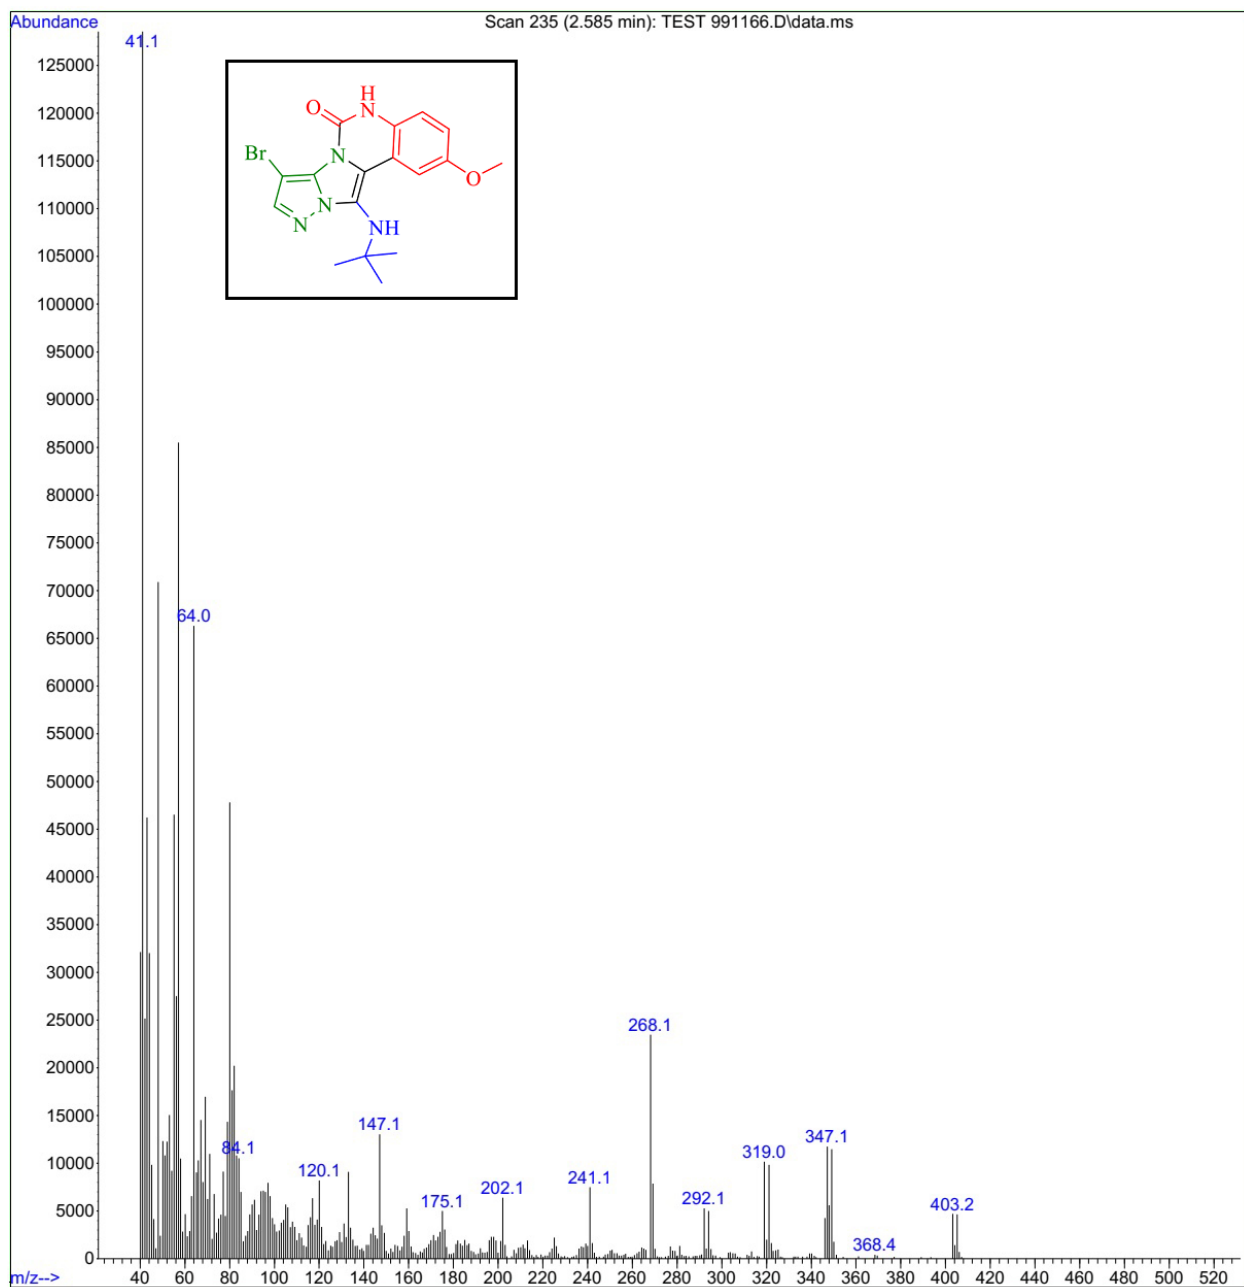

Figure S36. MASS spectrum of compound (4i).

**$^1\text{H}$  NMR,  $^{13}\text{C}$  NMR, FT-IR and MASS of compound (4j)**

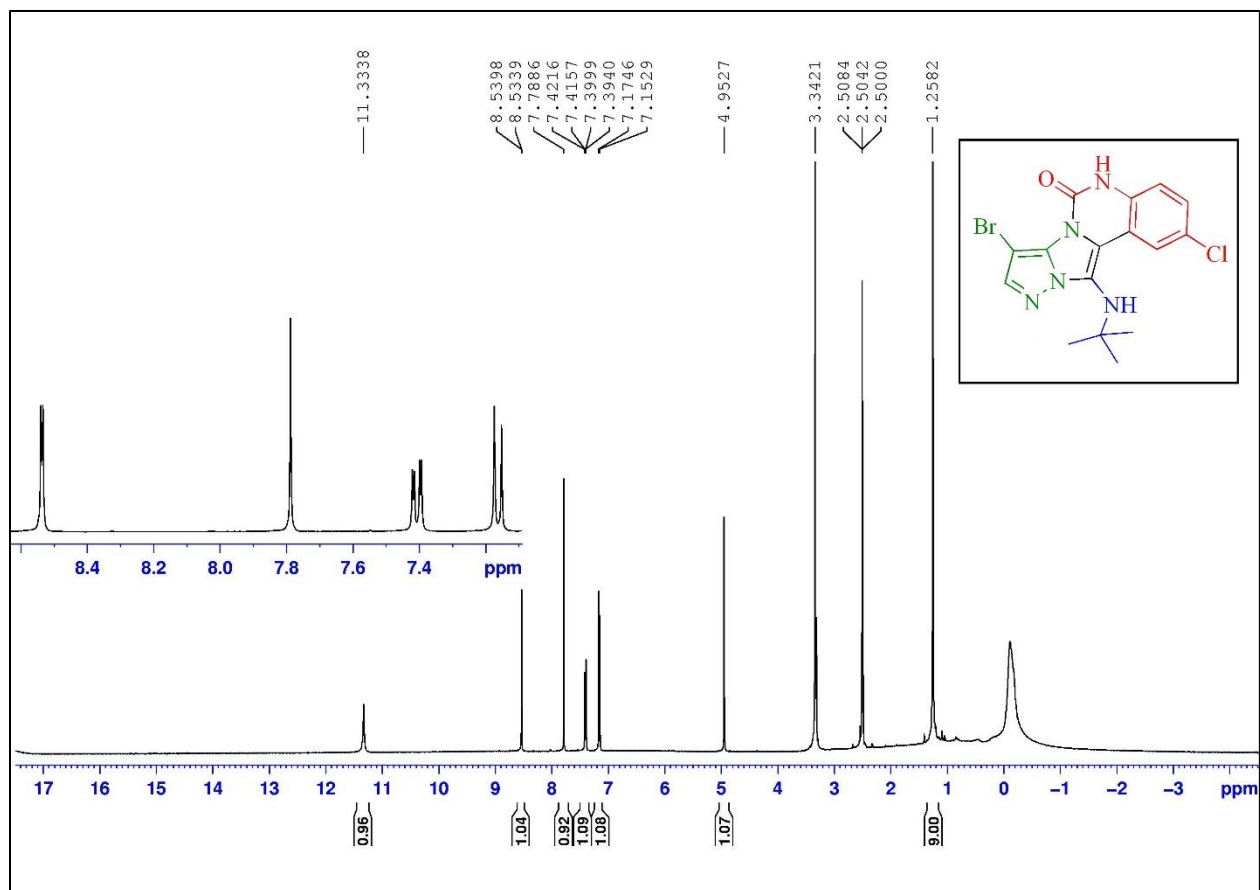

**Figure S37.**  $^1\text{H}$  NMR spectrum of compound (4j) in DMSO.

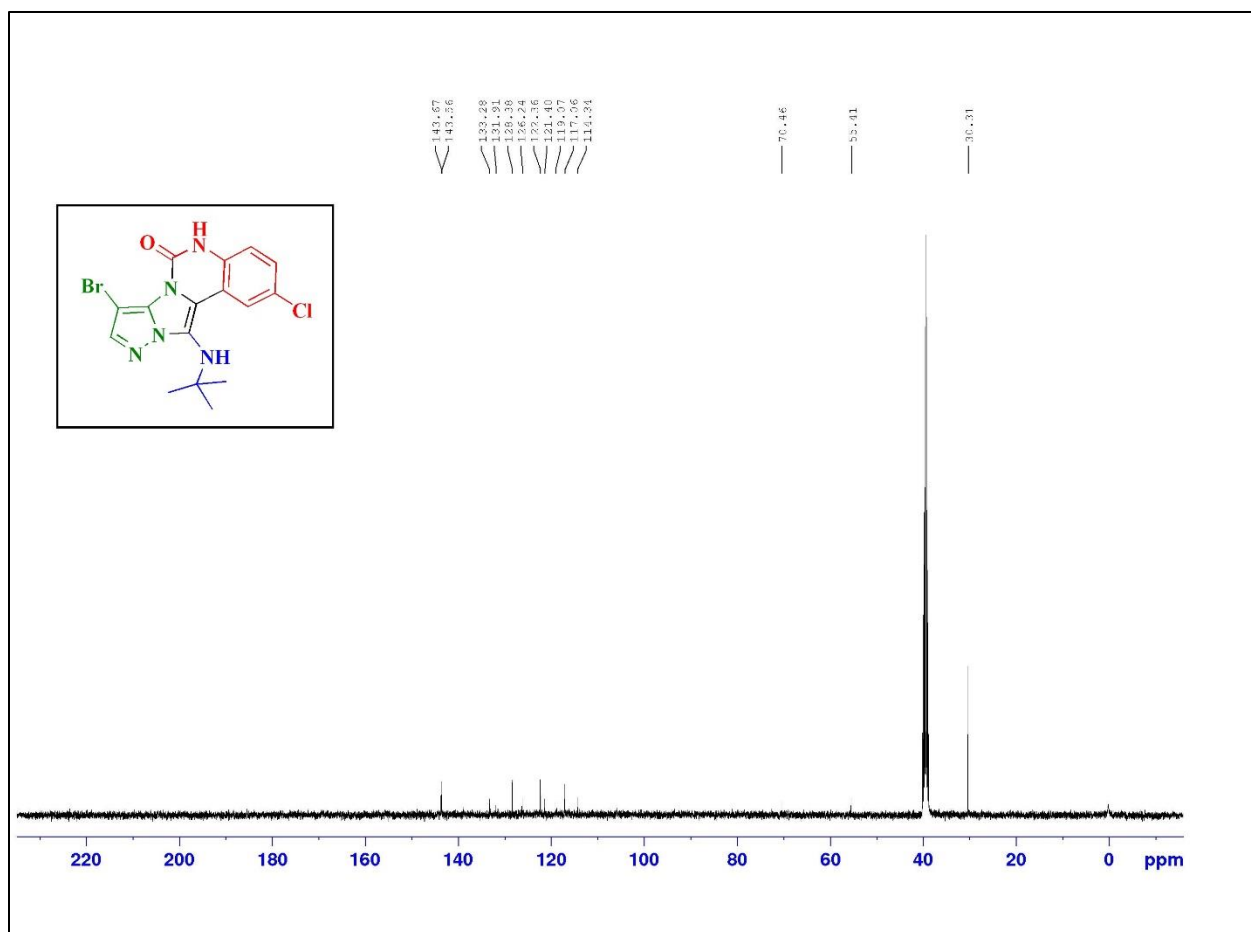

Figure S38. <sup>13</sup>C NMR spectrum of compound (4j) in DMSO.

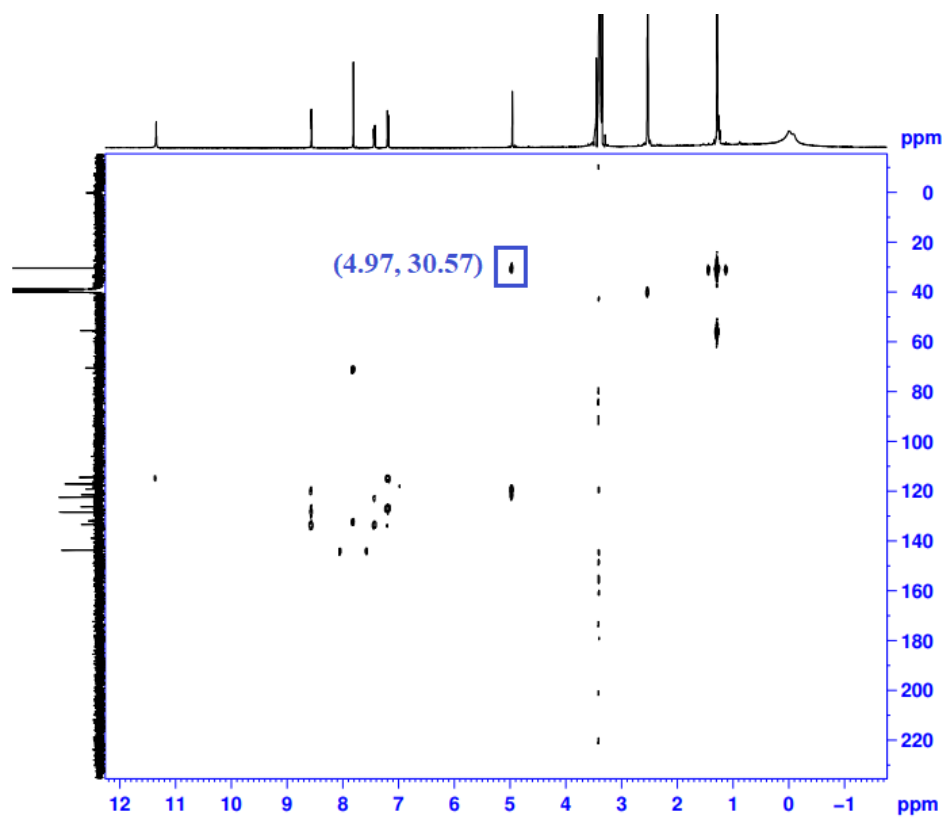

**Figure S39.** 2D HMBC spectrum of compound (4j) in DMSO.

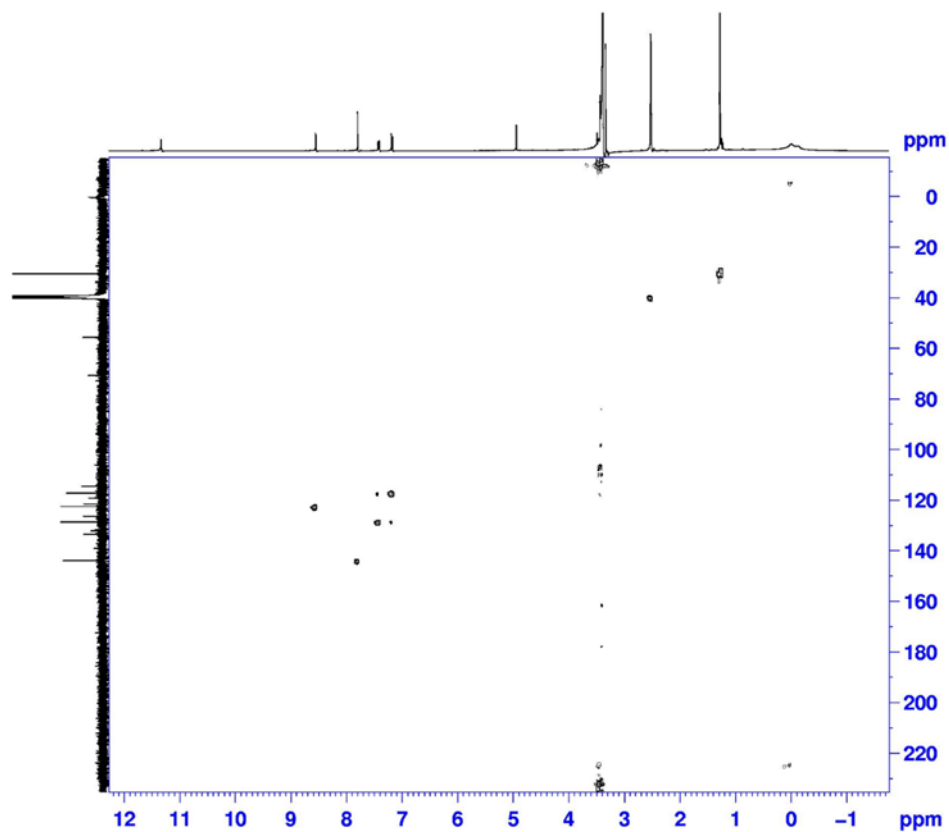

**Figure S40.** 2D HMBC spectrum of compound (4j) in DMSO.

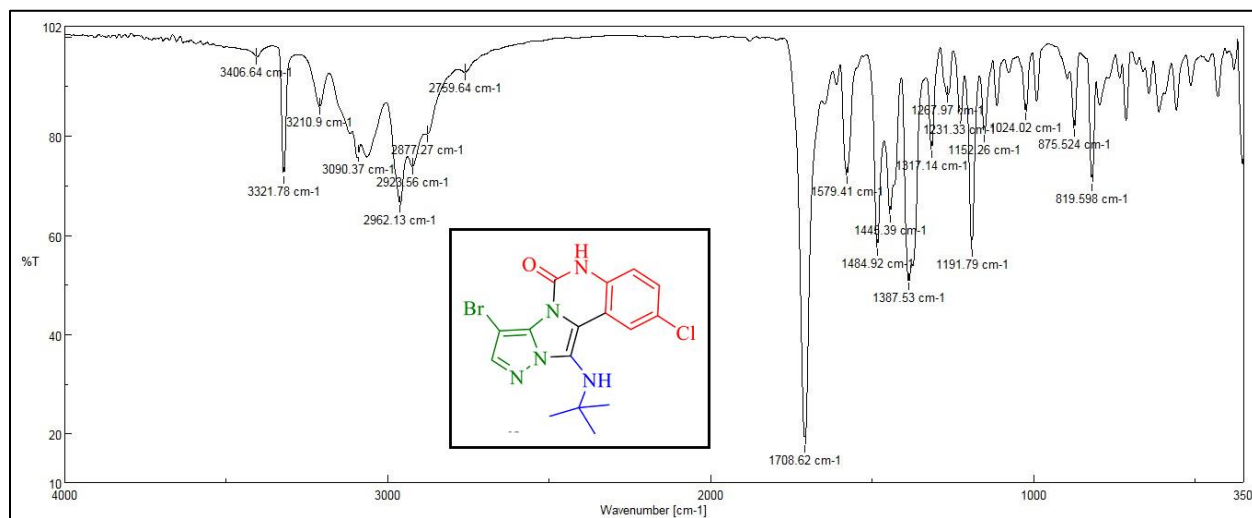

**Figure S41.** FT-IR spectrum of compound (4j).

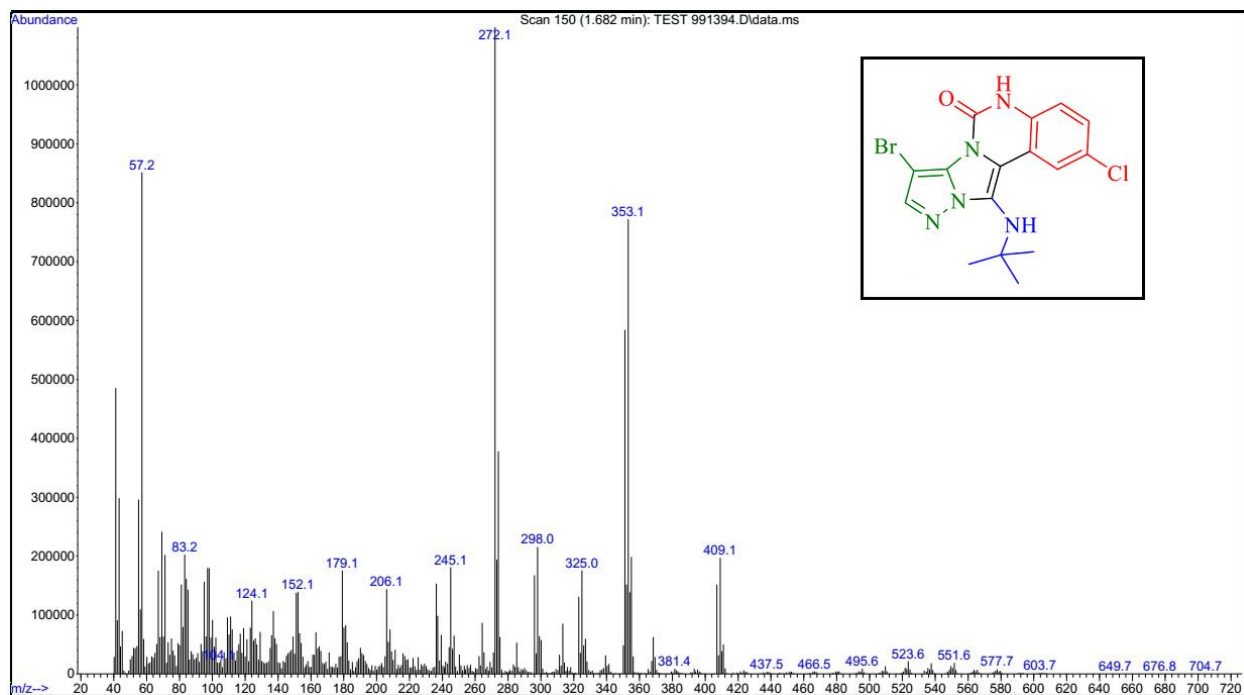

**Figure S42.** MASS spectrum of compound (4j).

**<sup>1</sup>H NMR, <sup>13</sup>C NMR, FT-IR and MASS of compound (4k)**

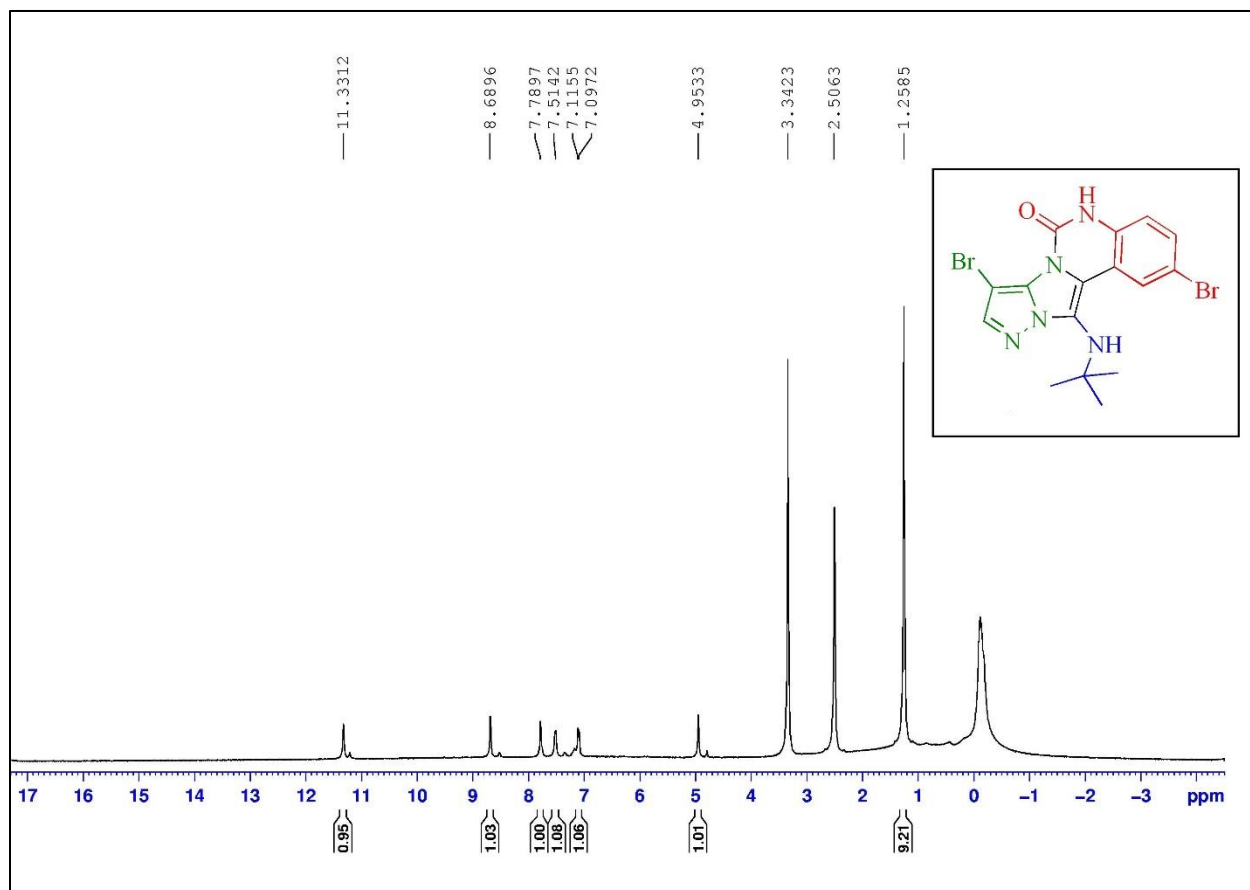

**Figure S43.** <sup>1</sup>H NMR spectrum of compound (4k) in DMSO.

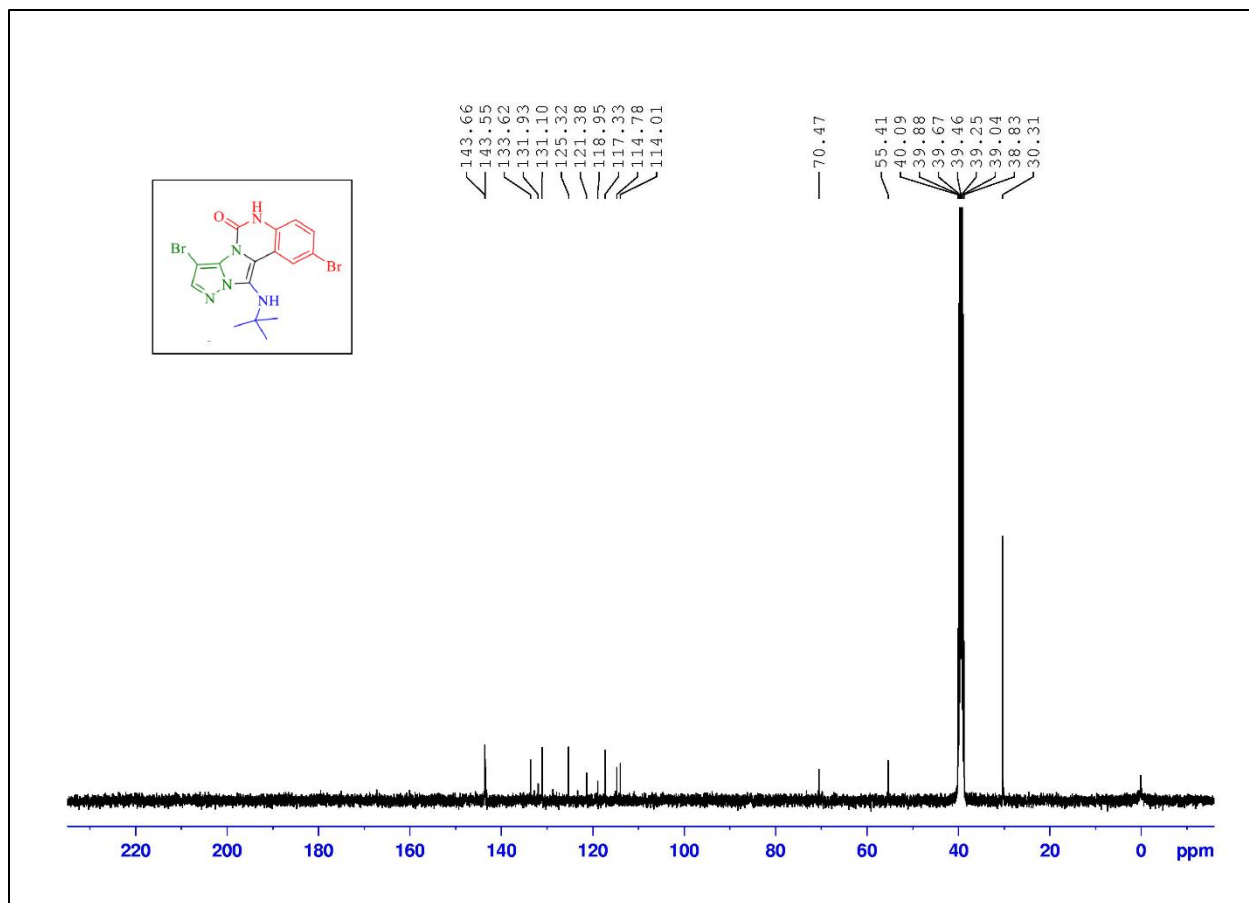

Figure S44.  $^{13}\text{C}$  NMR spectrum of compound (4k) in DMSO.

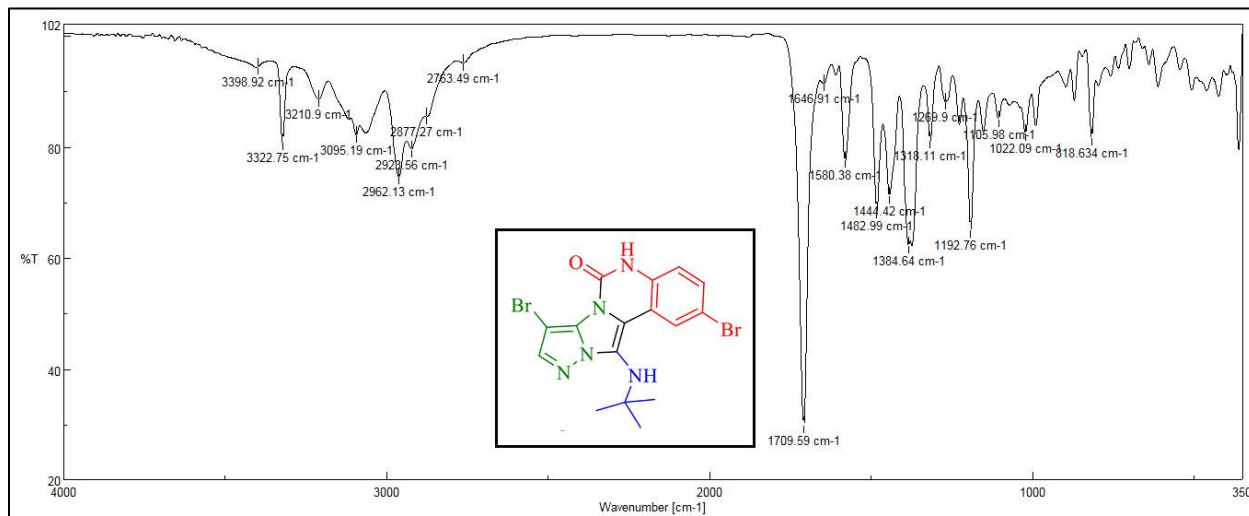

Figure S45. FT-IR spectrum of compound (4k).



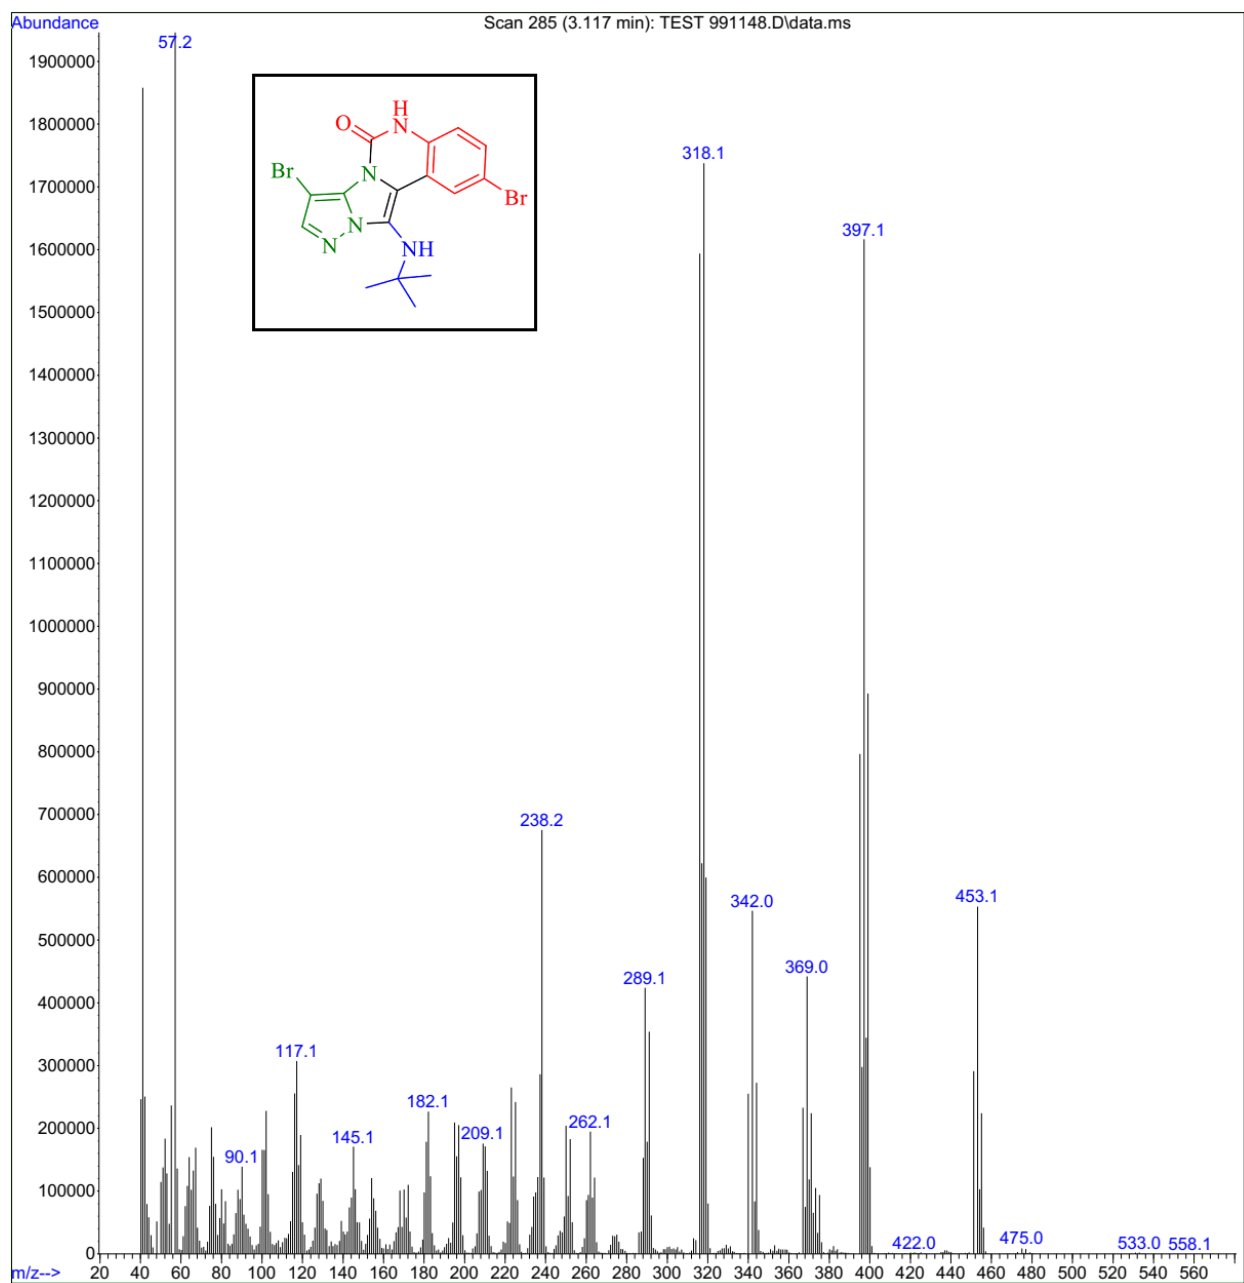

Figure S46. MASS spectrum of compound (4k).

**$^1\text{H}$  NMR,  $^{13}\text{C}$  NMR, FT-IR and MASS of compound (4l)**

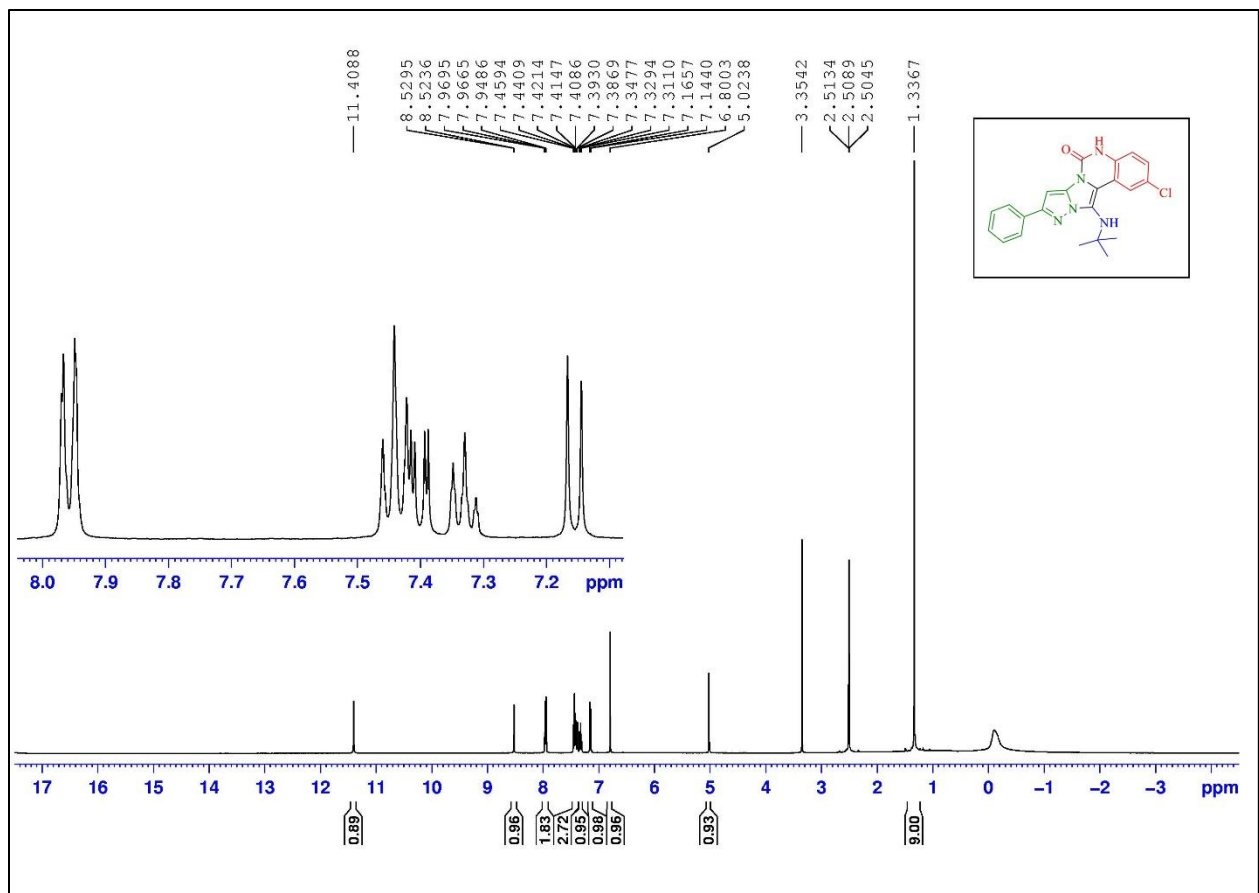

Figure S47.  $^1\text{H}$  NMR spectrum of compound (4l) in DMSO.

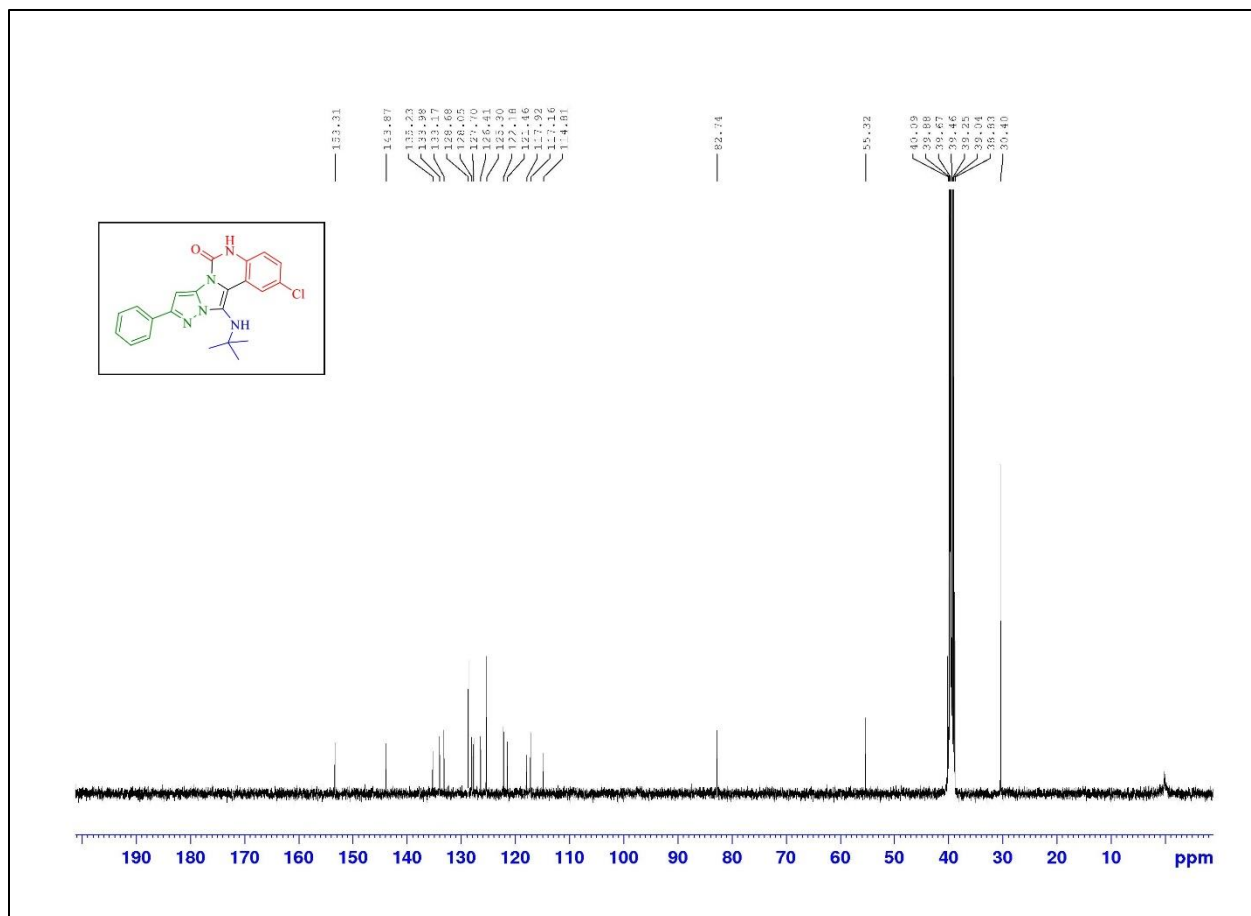

Figure S48. <sup>13</sup>C NMR spectrum of compound (4I) in DMSO.

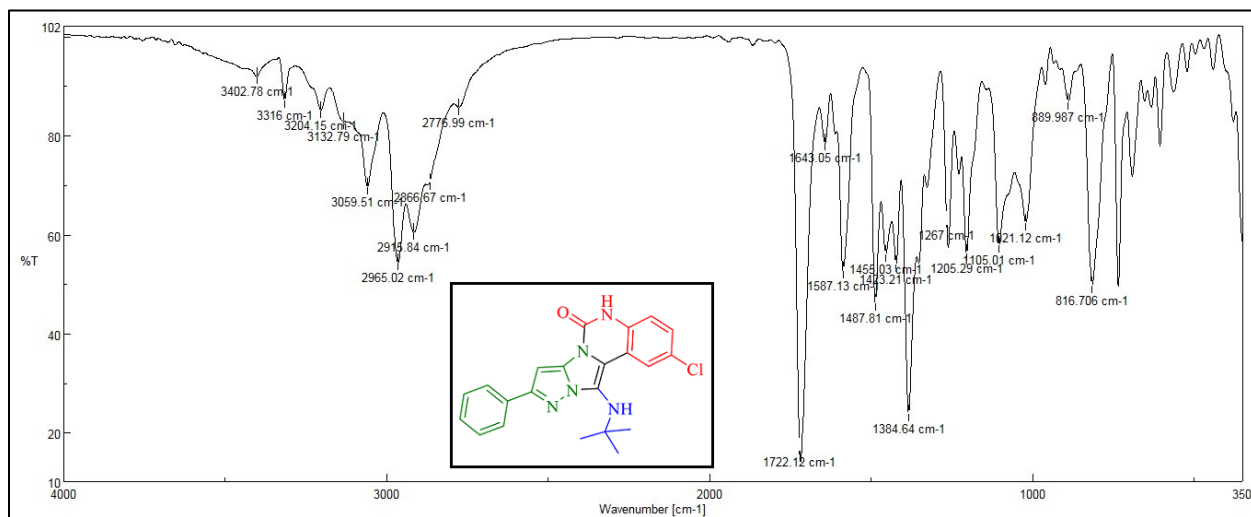

Figure S49. FT-IR spectrum of compound (4I).

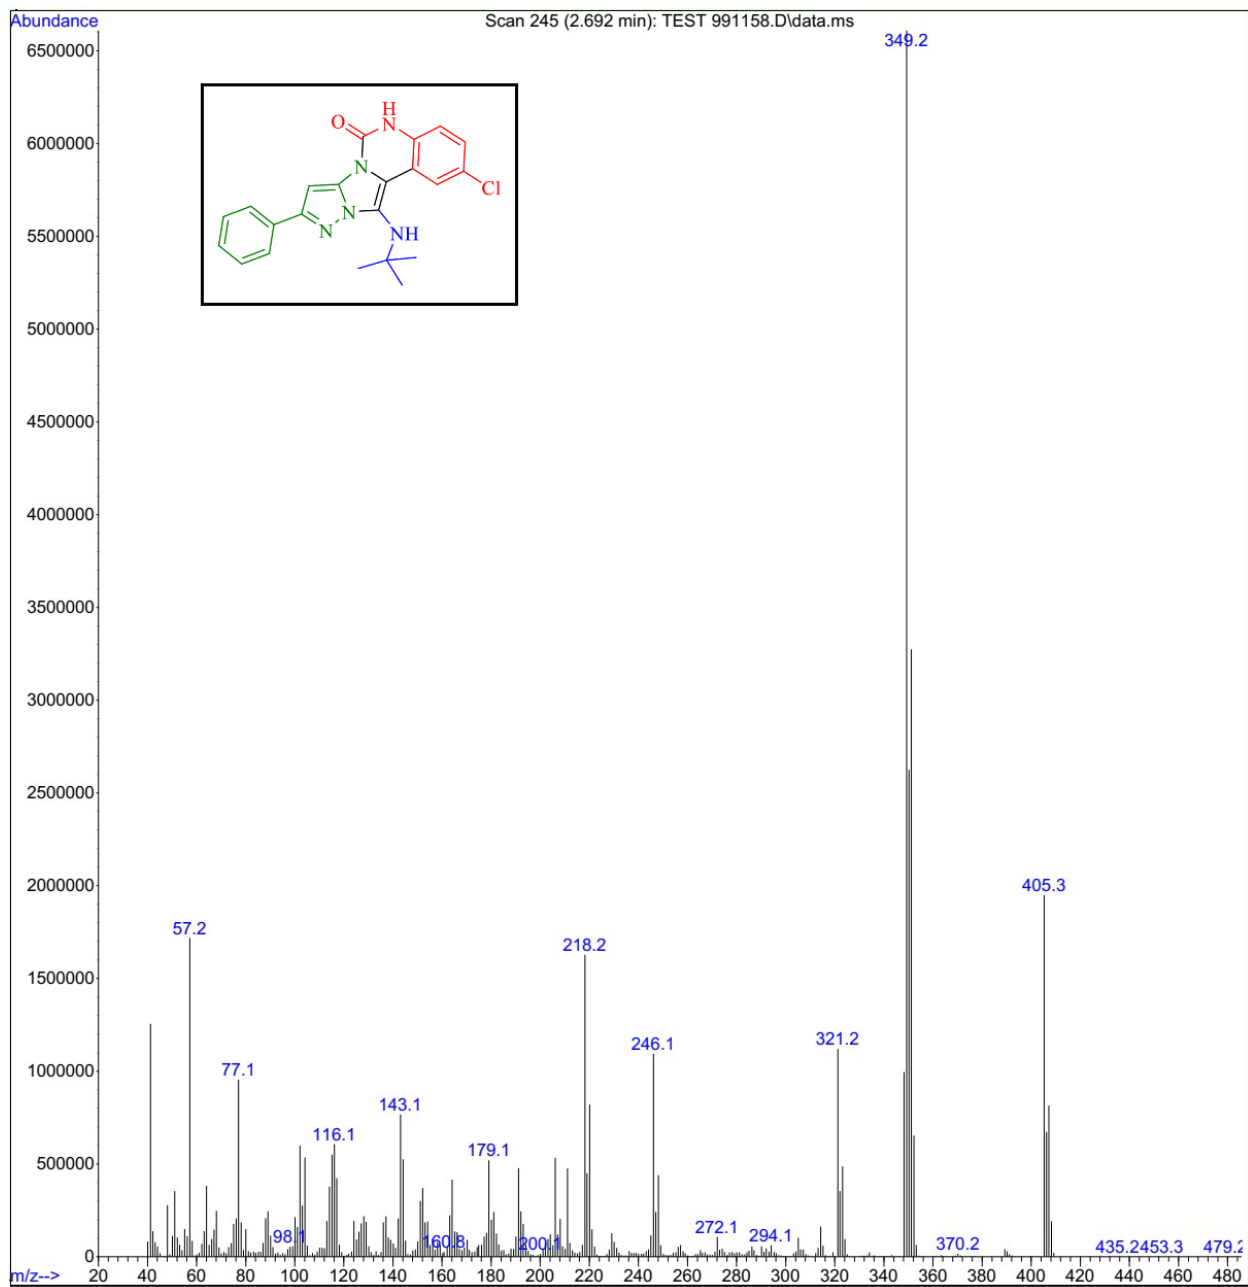

Figure S50. MASS spectrum of compound (41).

**$^1\text{H}$  NMR,  $^{13}\text{C}$  NMR, FT-IR and MASS of compound (4m)**

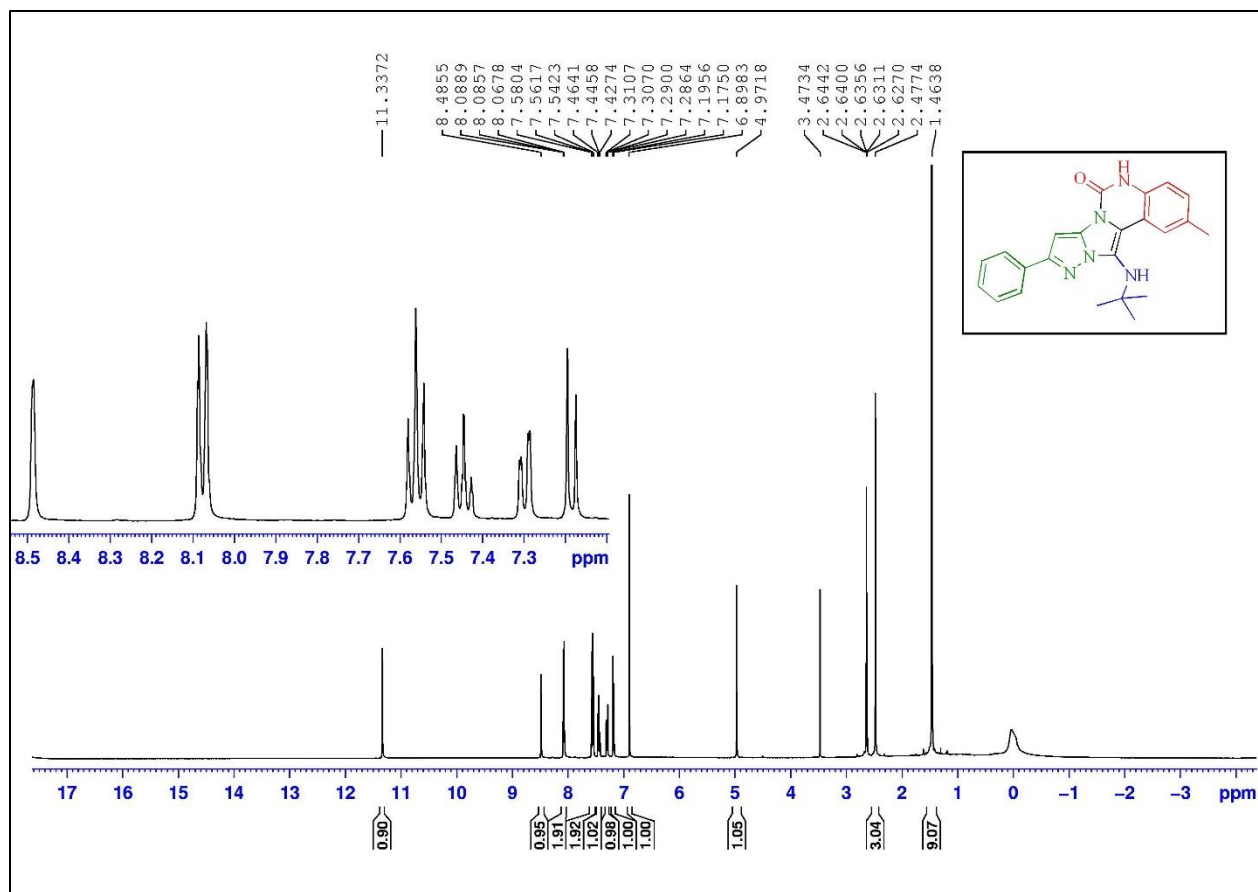

**Figure S51.**  $^1\text{H}$  NMR spectrum of compound (4m) in DMSO.

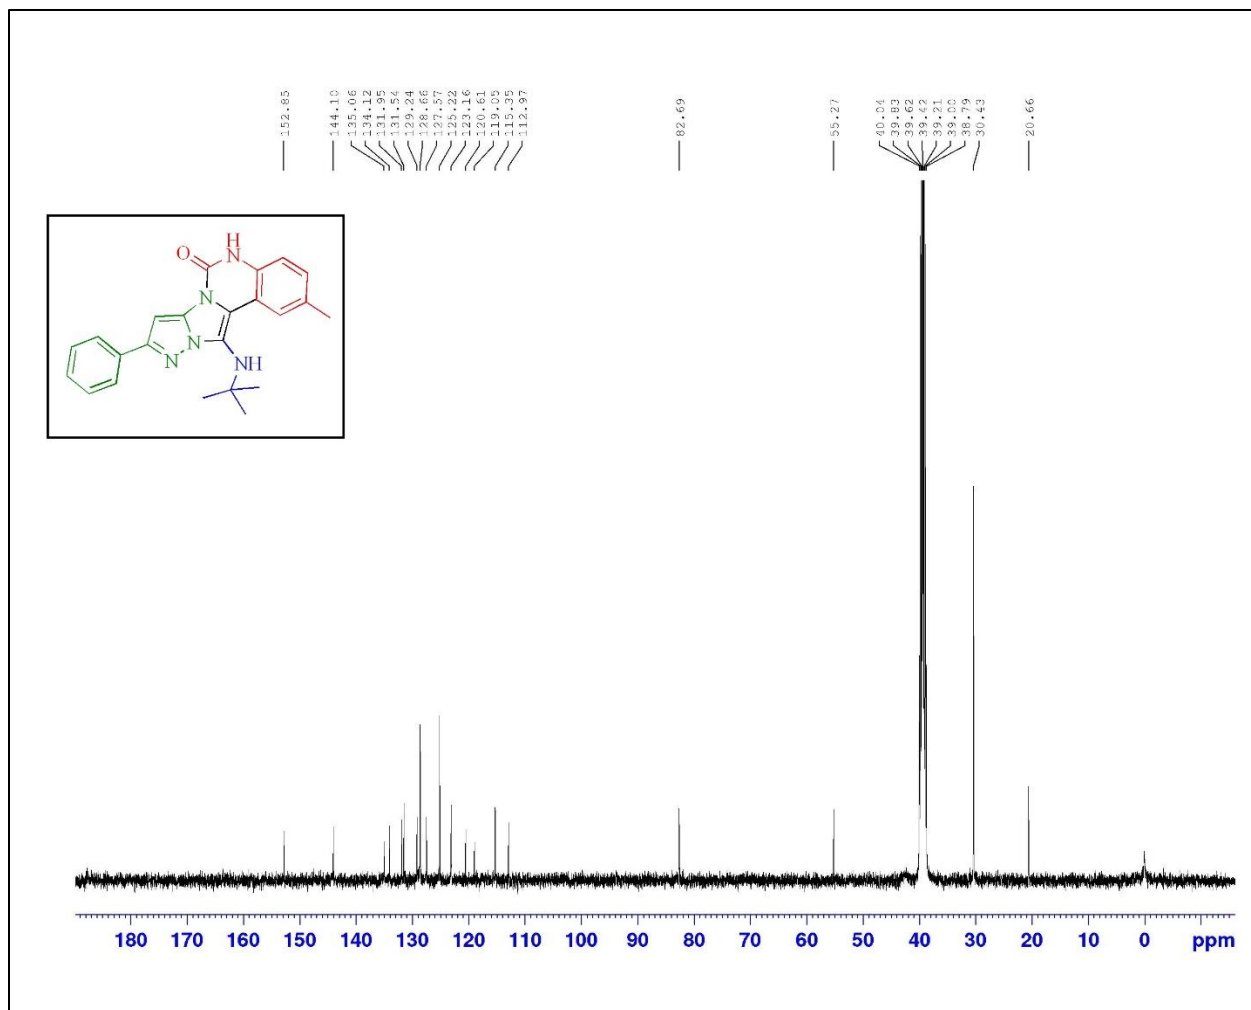

Figure S52. <sup>13</sup>C NMR spectrum of compound (4m) in DMSO.

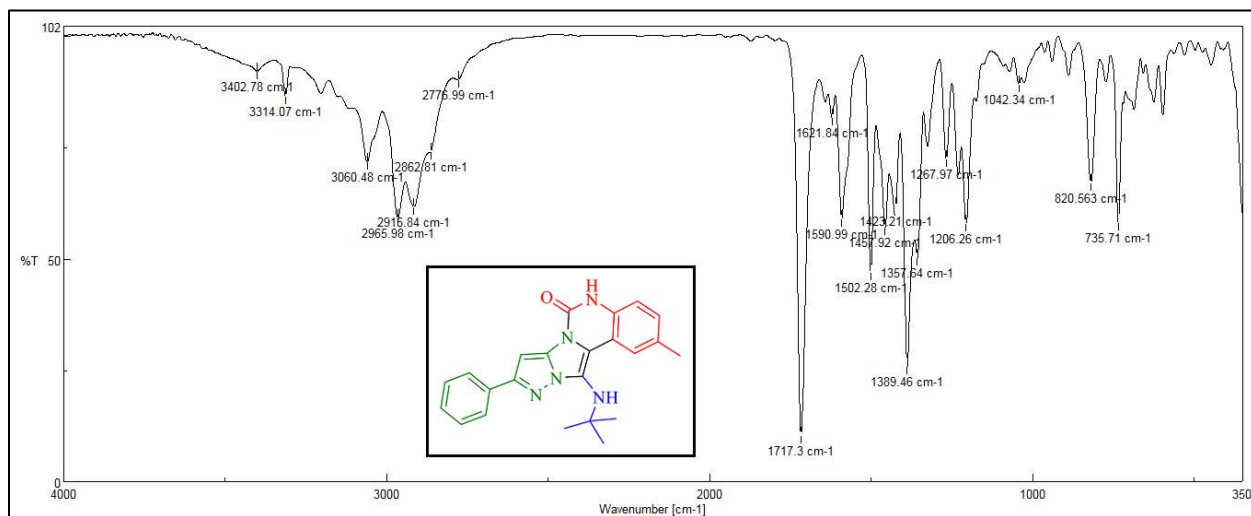

Figure S53. FT-IR spectrum of compound (4m).

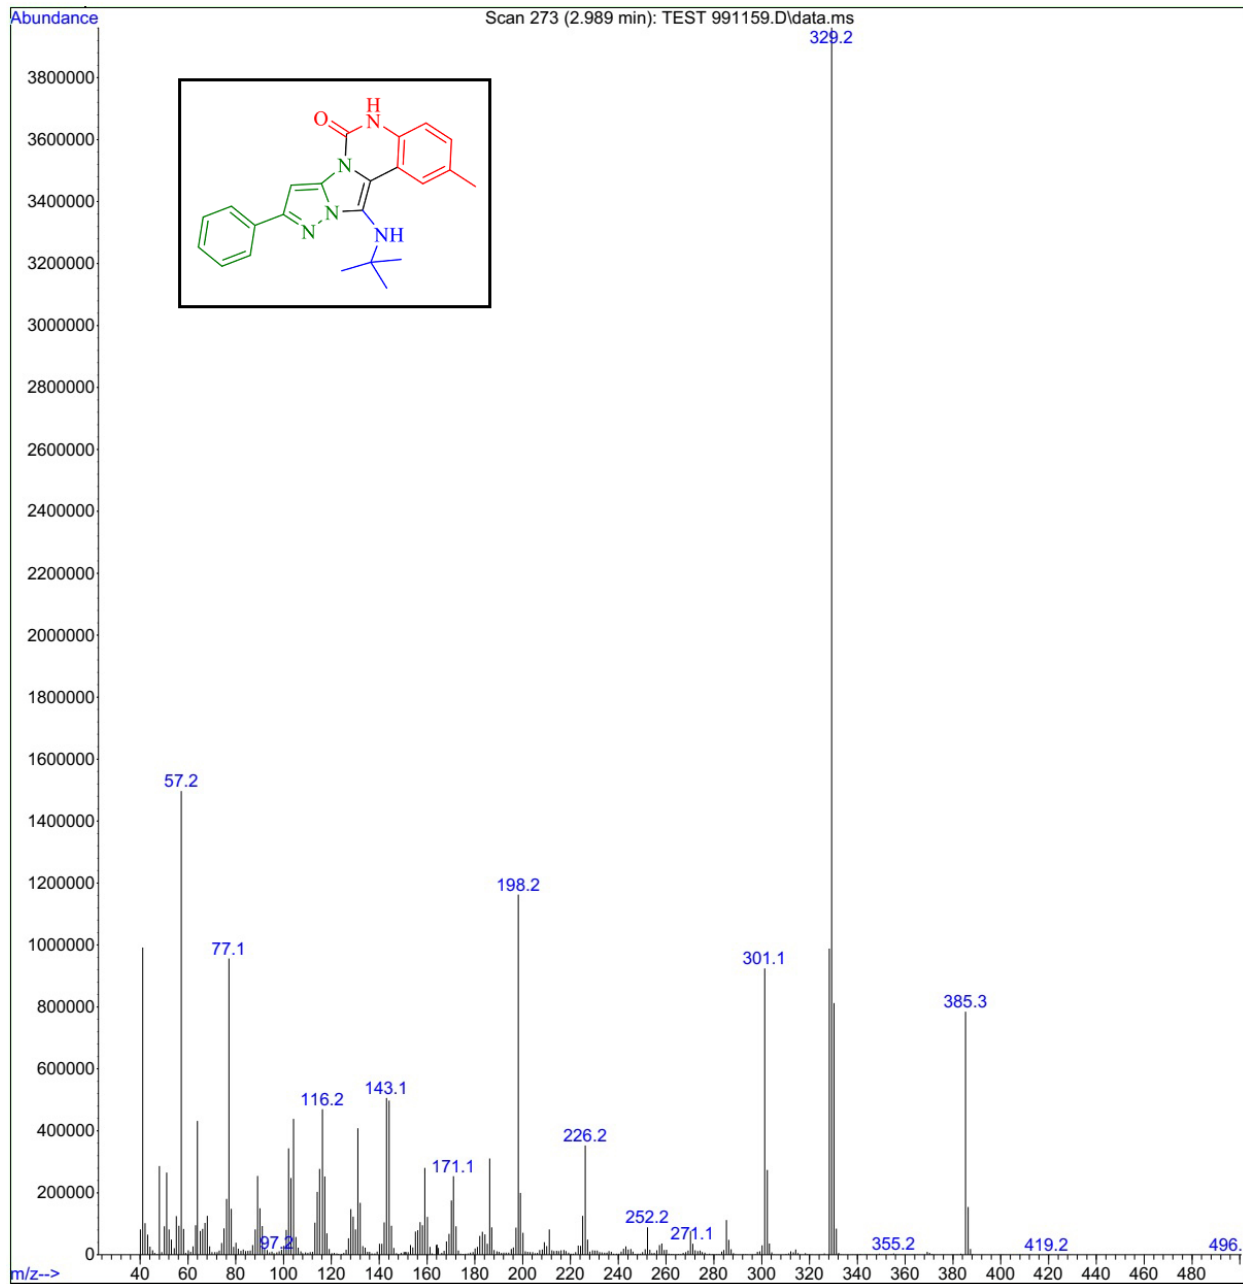

Figure S54. MASS spectrum of compound (4m).

**$^1\text{H}$  NMR,  $^{13}\text{C}$  NMR, FT-IR and MASS of compound (4n)**

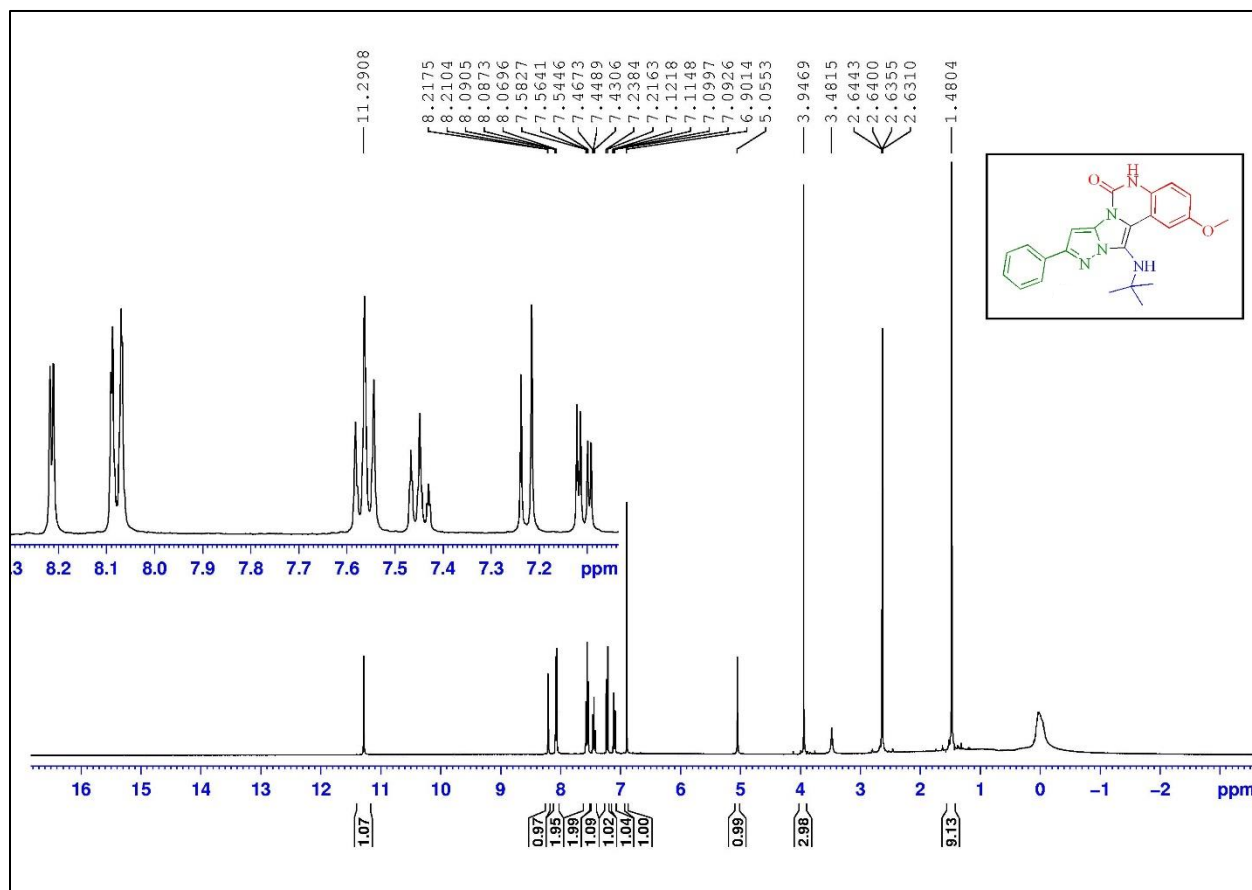

**Figure S55.**  $^1\text{H}$  NMR spectrum of compound (4n) in DMSO.



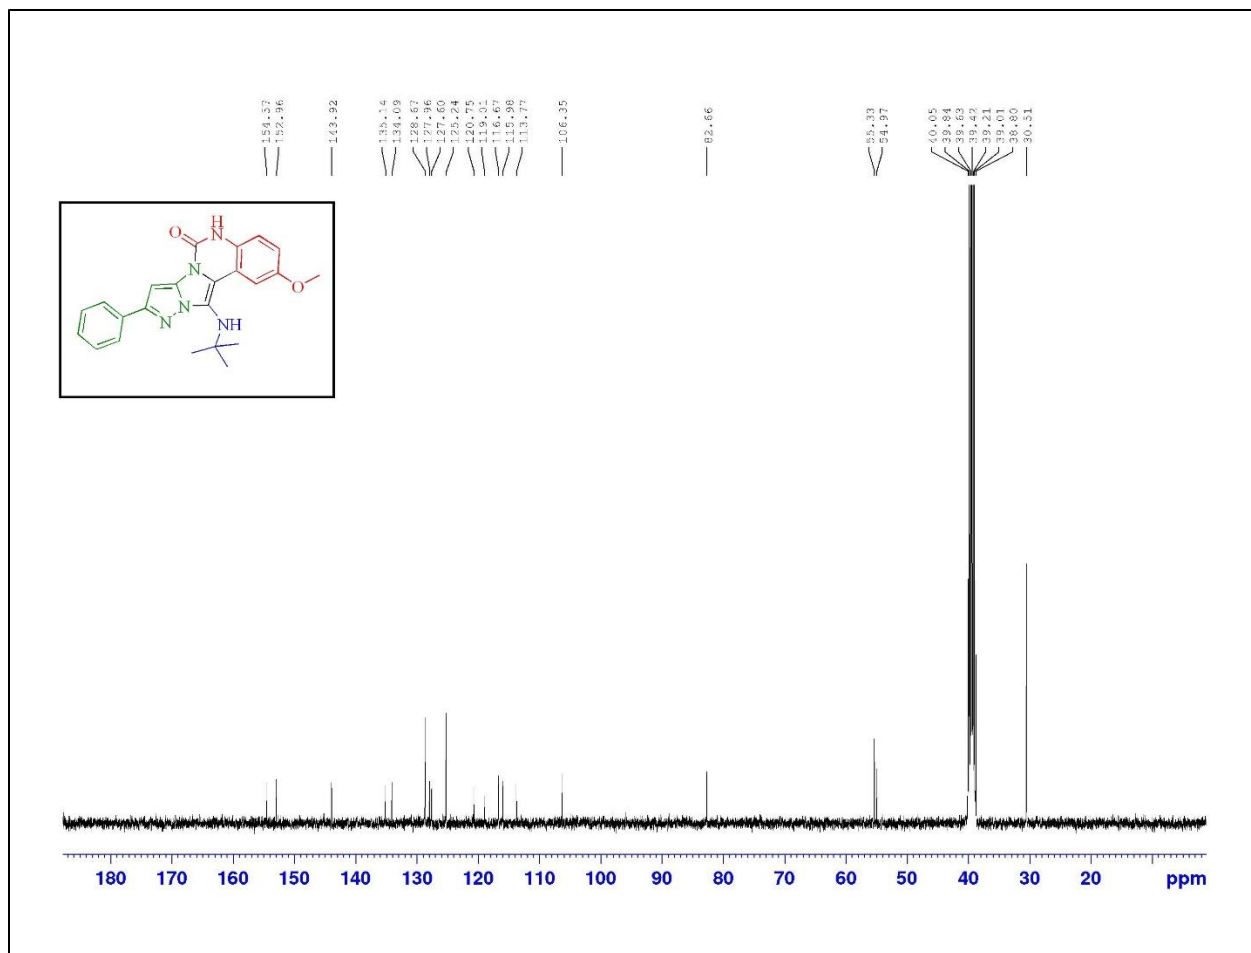

Figure S56. <sup>13</sup>C NMR spectrum of compound (4n) in DMSO.

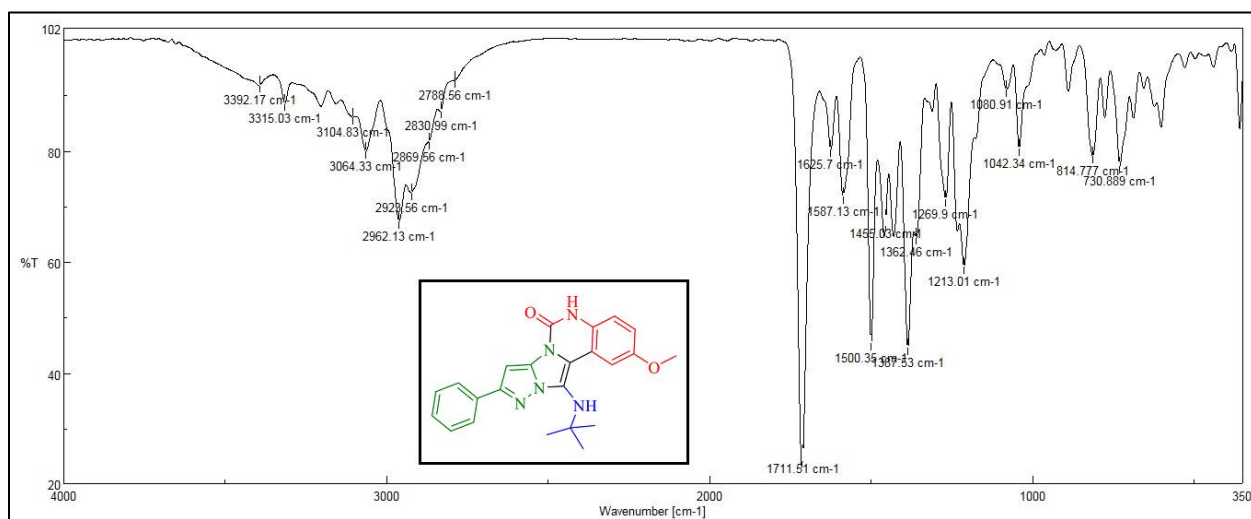

Figure S57. FT-IR spectrum of compound (4n).

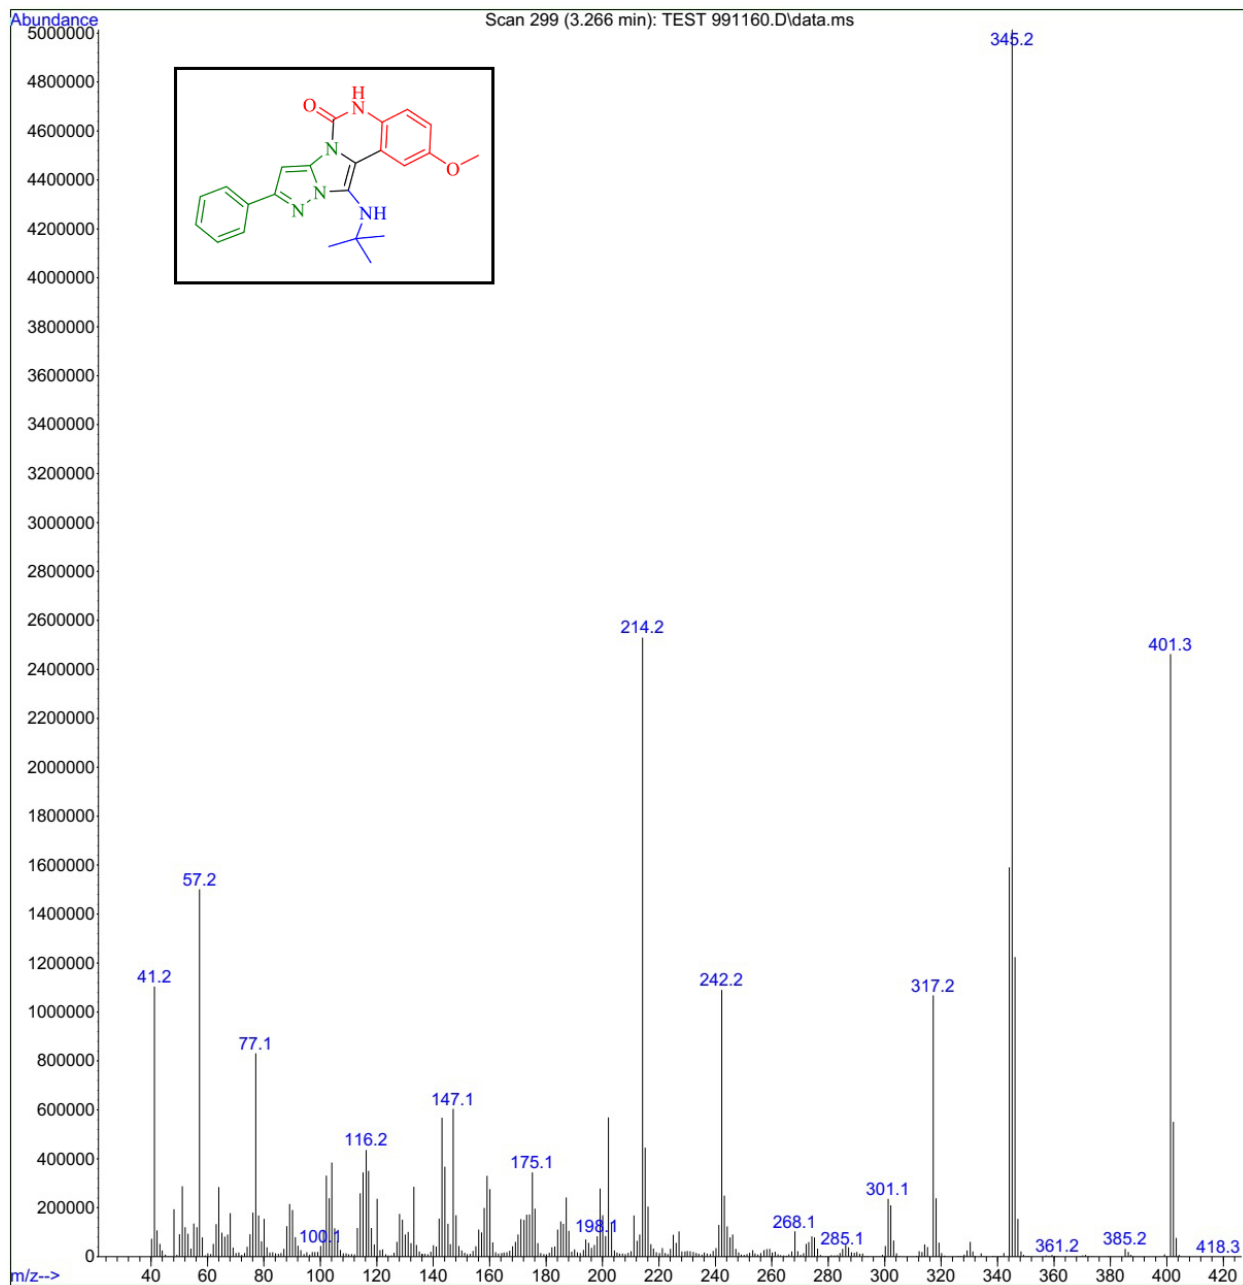

Figure S58. MASS spectrum of compound (4n).

**$^1\text{H}$  NMR,  $^{13}\text{C}$  NMR, FT-IR and MASS of compound (4o)**

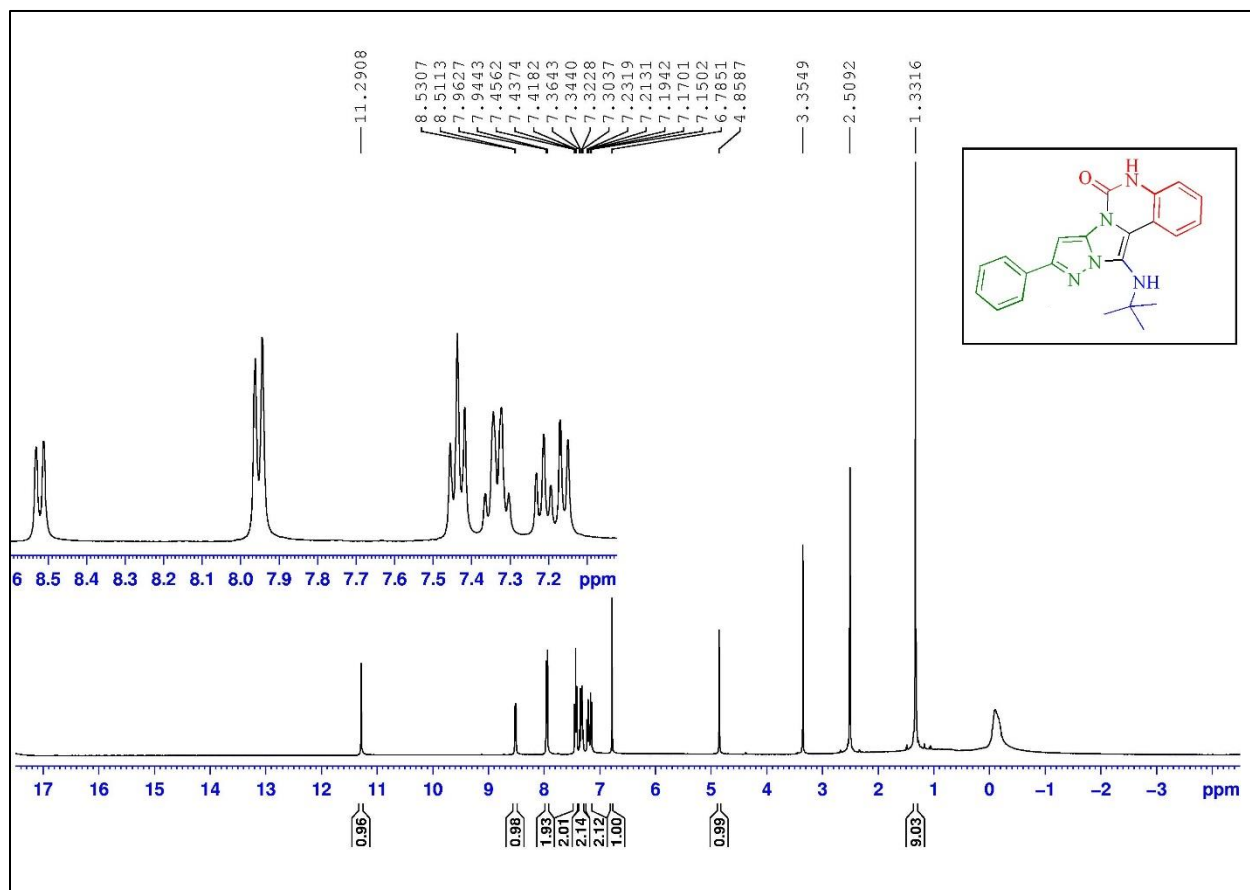

**Figure S59.**  $^1\text{H}$  NMR spectrum of compound (4o) in DMSO.

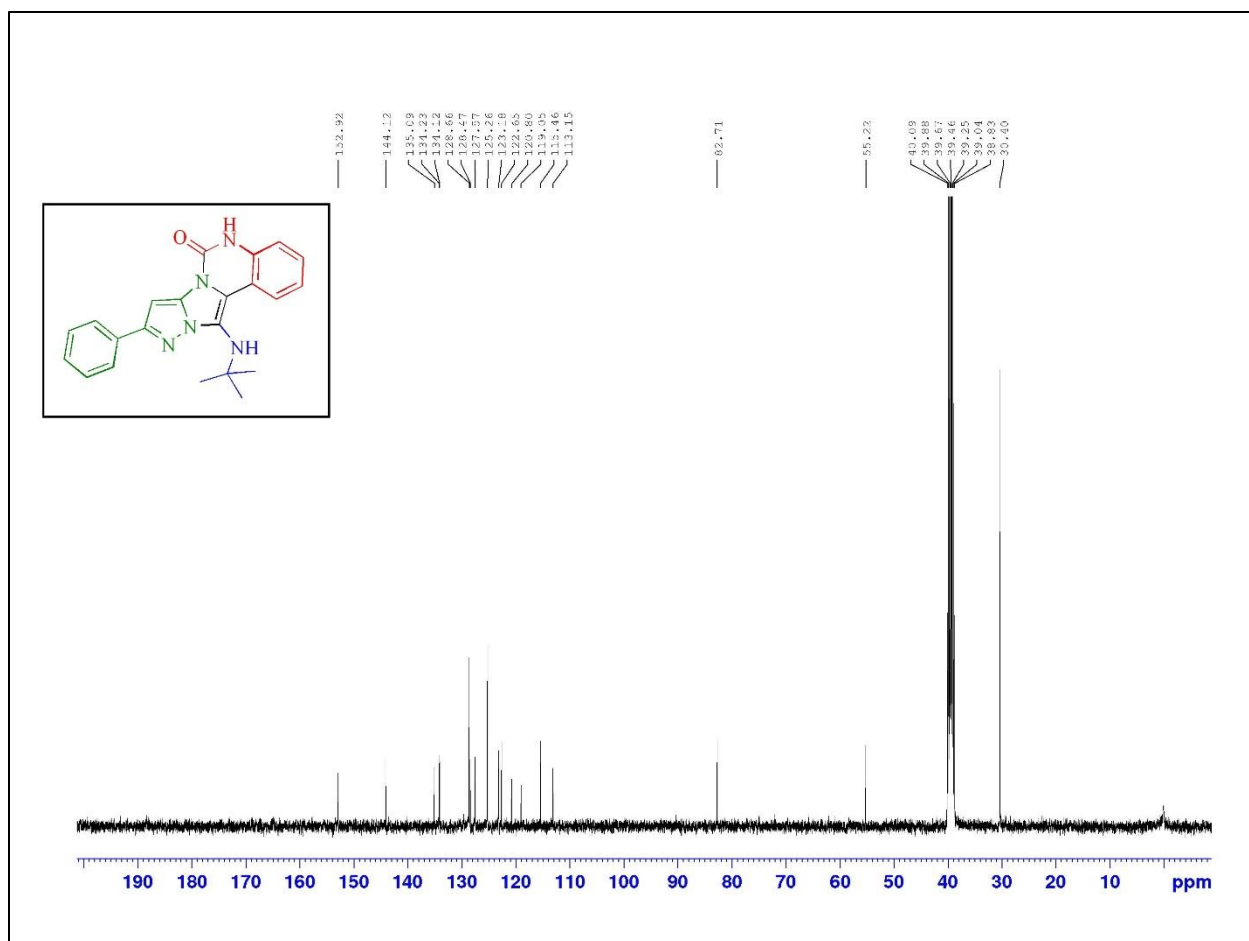

Figure S60.  $^{13}\text{C}$  NMR spectrum of compound (4o) in DMSO.

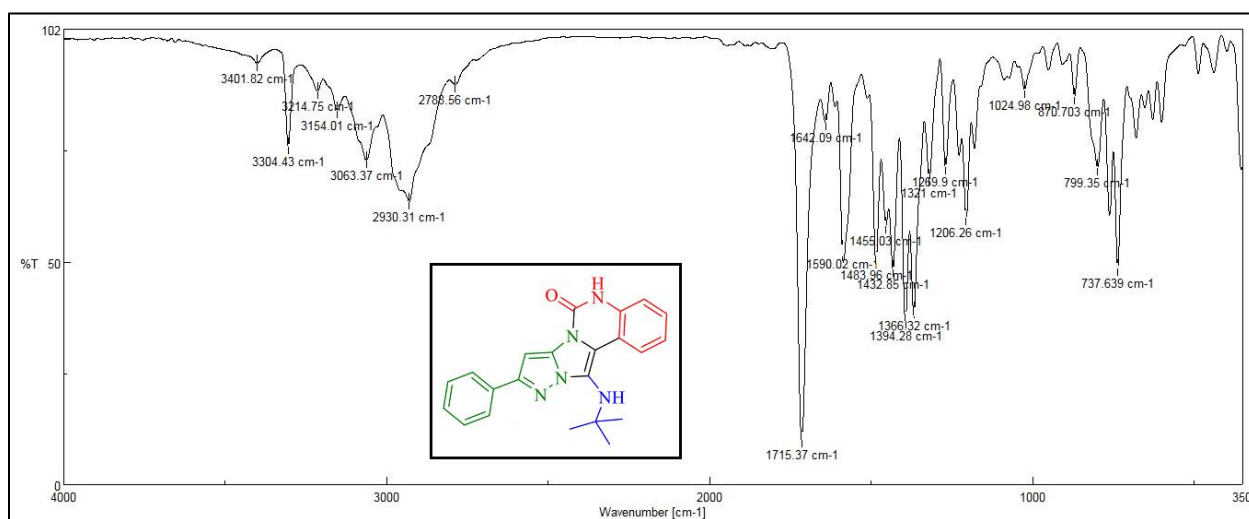

Figure S61. FT-IR spectrum of compound (4o).

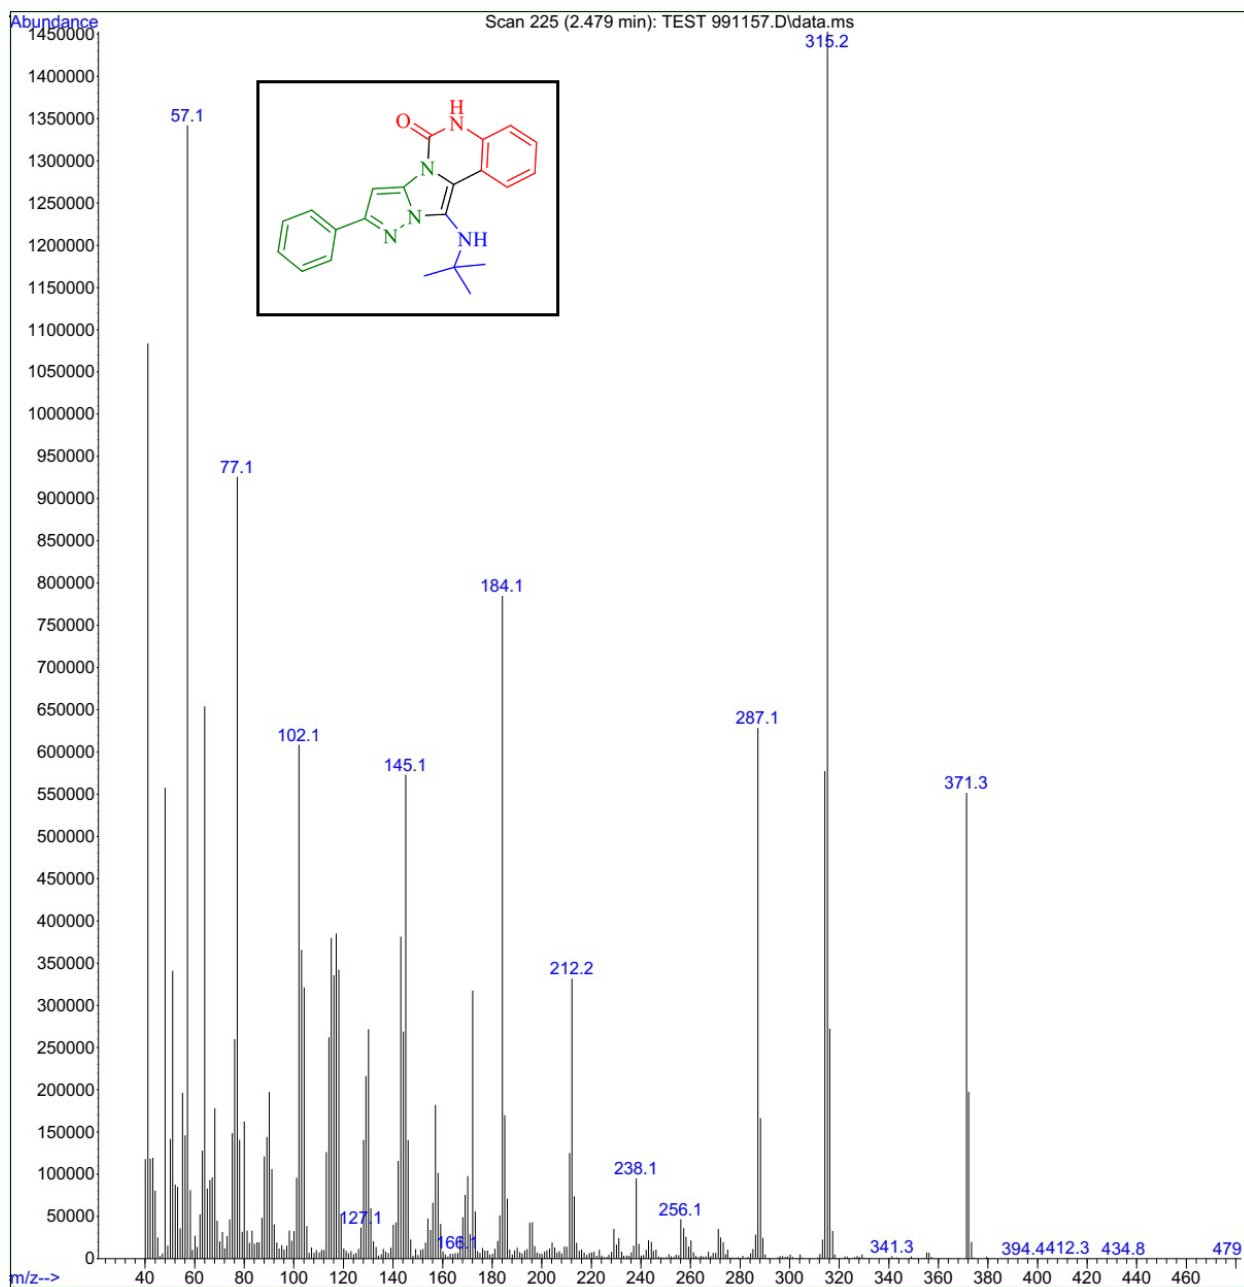

Figure S62. MASS spectrum of compound (4o).

**<sup>1</sup>H NMR, <sup>13</sup>C NMR, FT-IR and MASS of compound (p)**

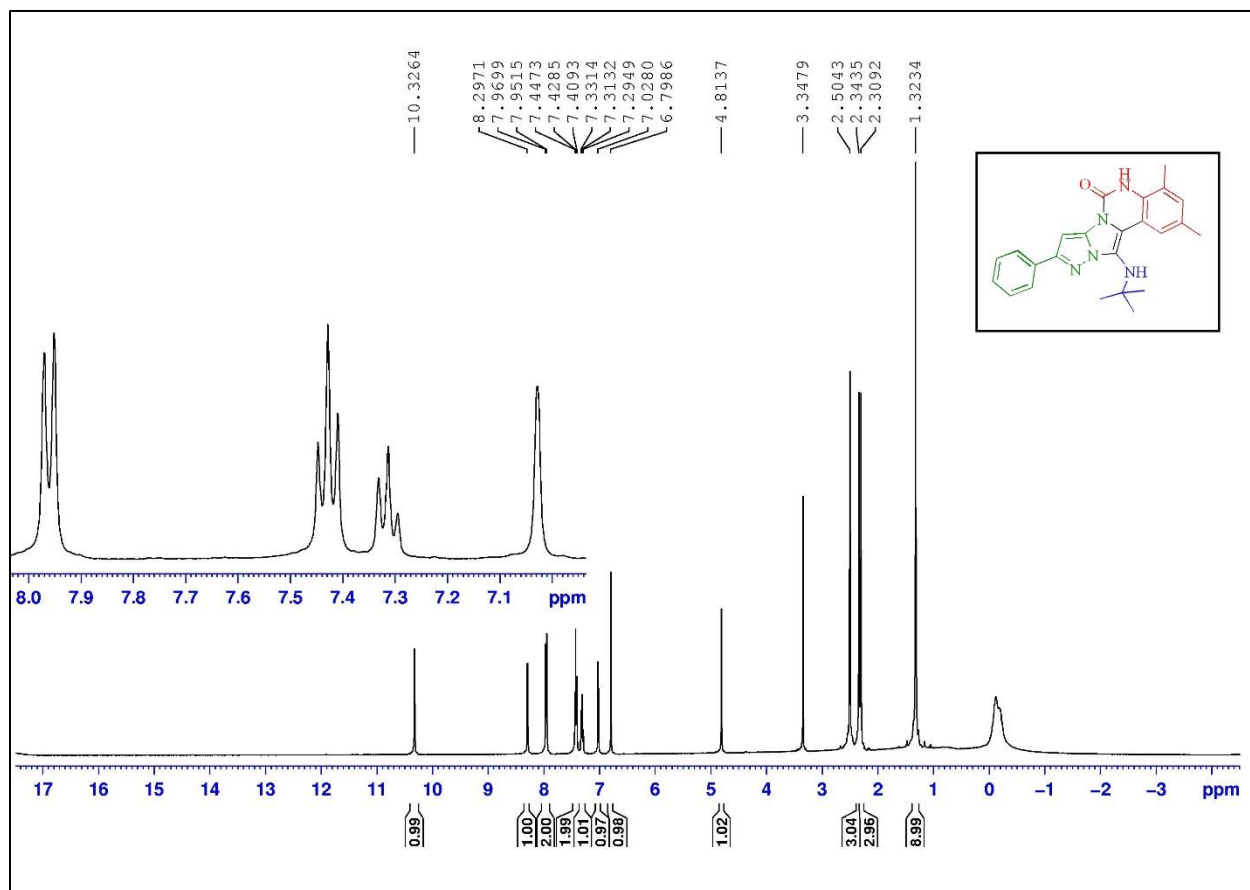

**Figure S63.** <sup>1</sup>H NMR spectrum of compound (4p) in DMSO.

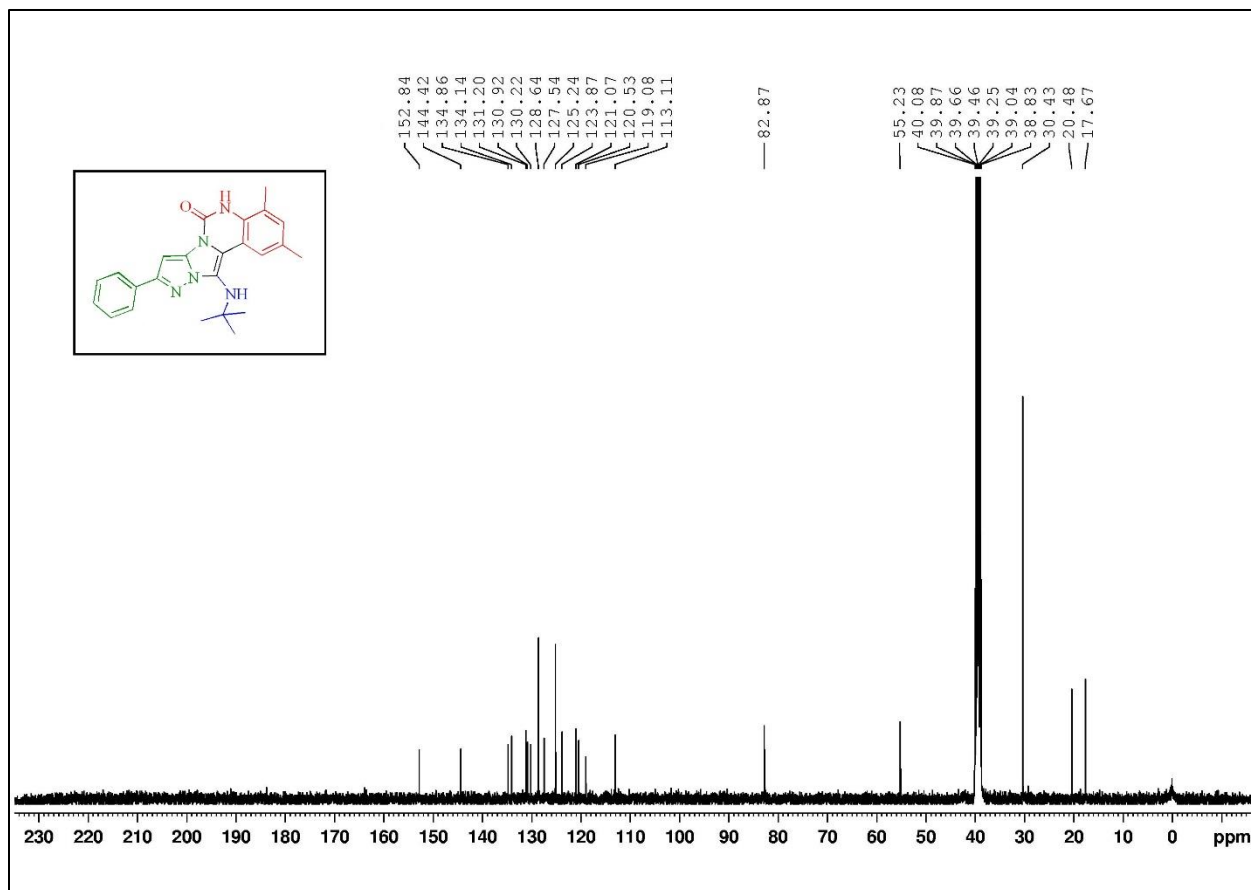

Figure S64. <sup>13</sup>C NMR spectrum of compound (4p) in DMSO.

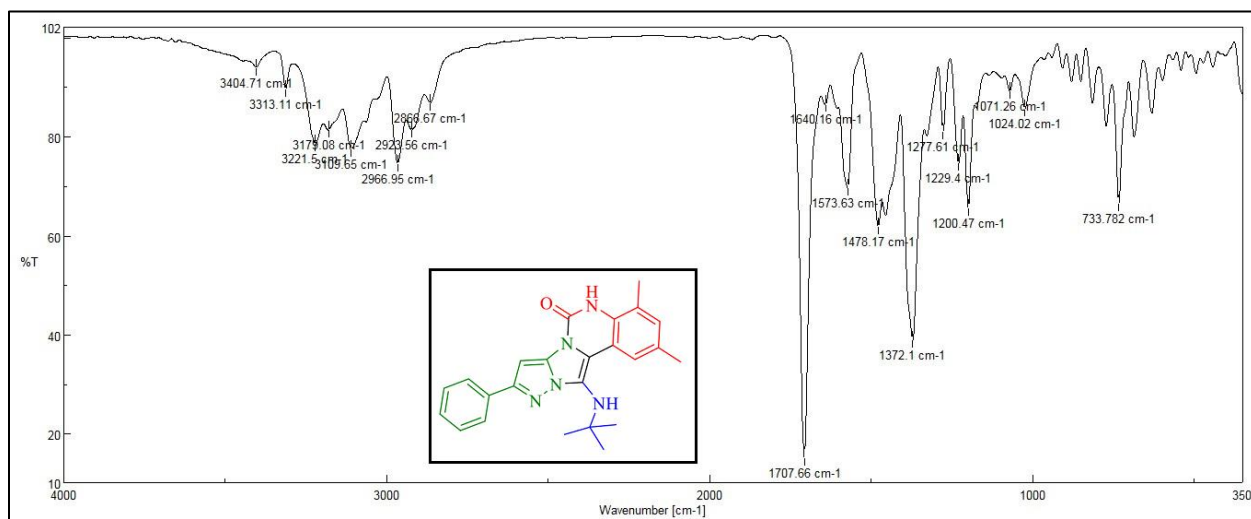

Figure S65. FT-IR spectrum of compound (4p).

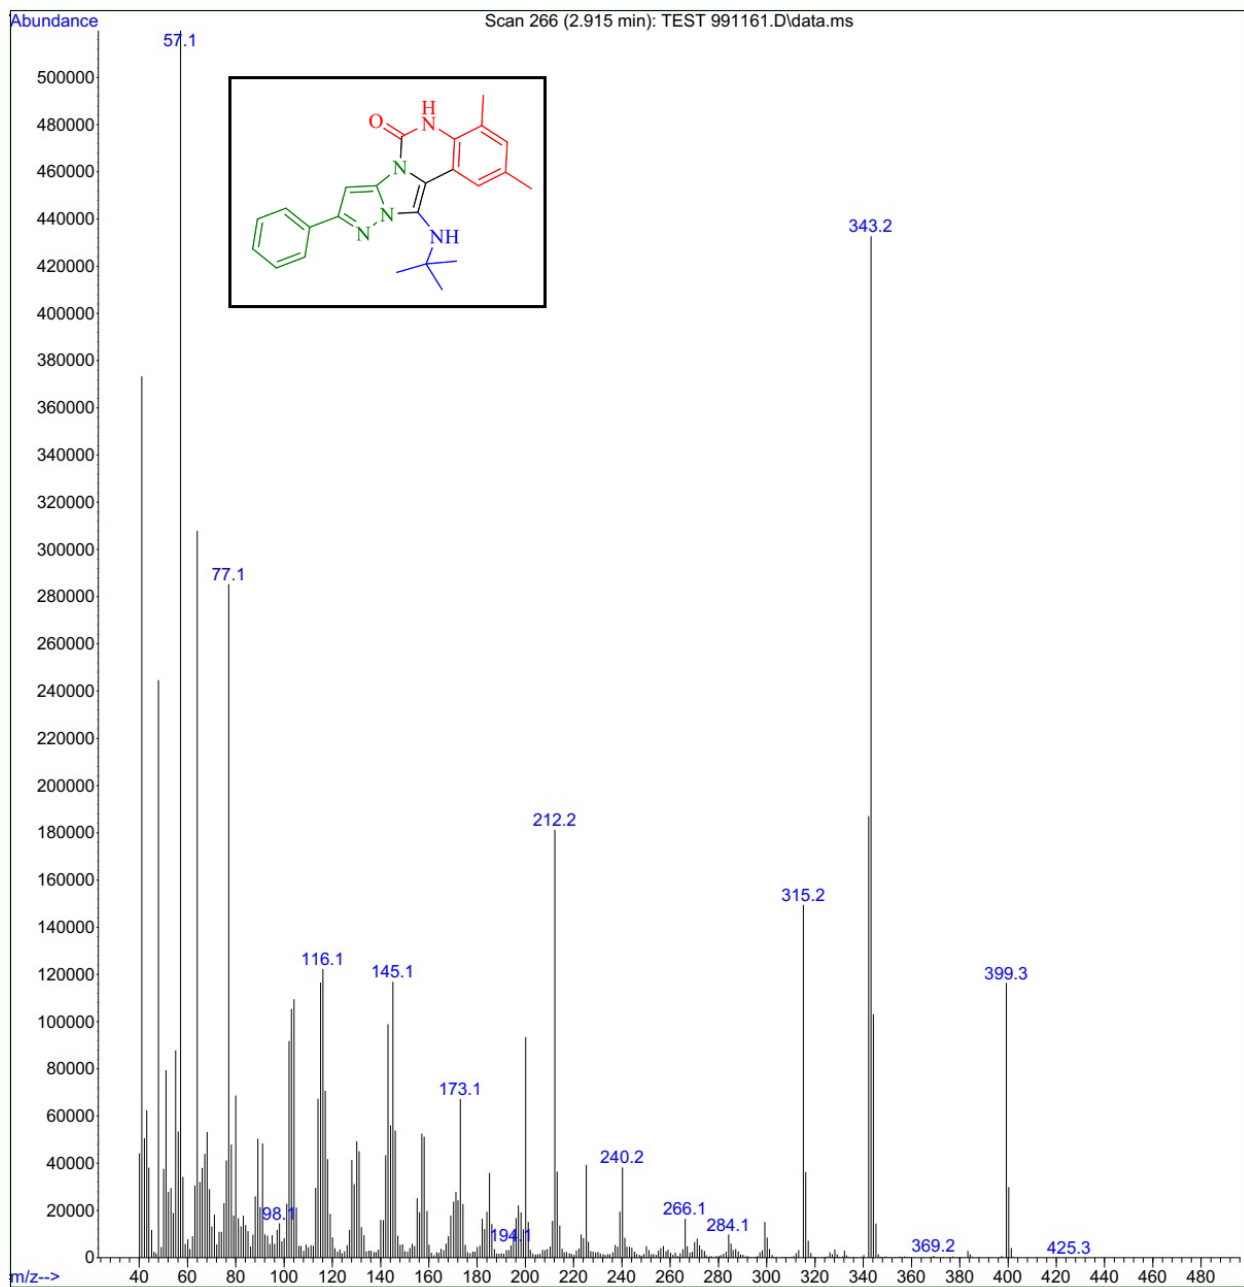

Figure S66. MASS spectrum of compound (4p).



**<sup>1</sup>H NMR, <sup>13</sup>C NMR, FT-IR and MASS of compound (4q)**

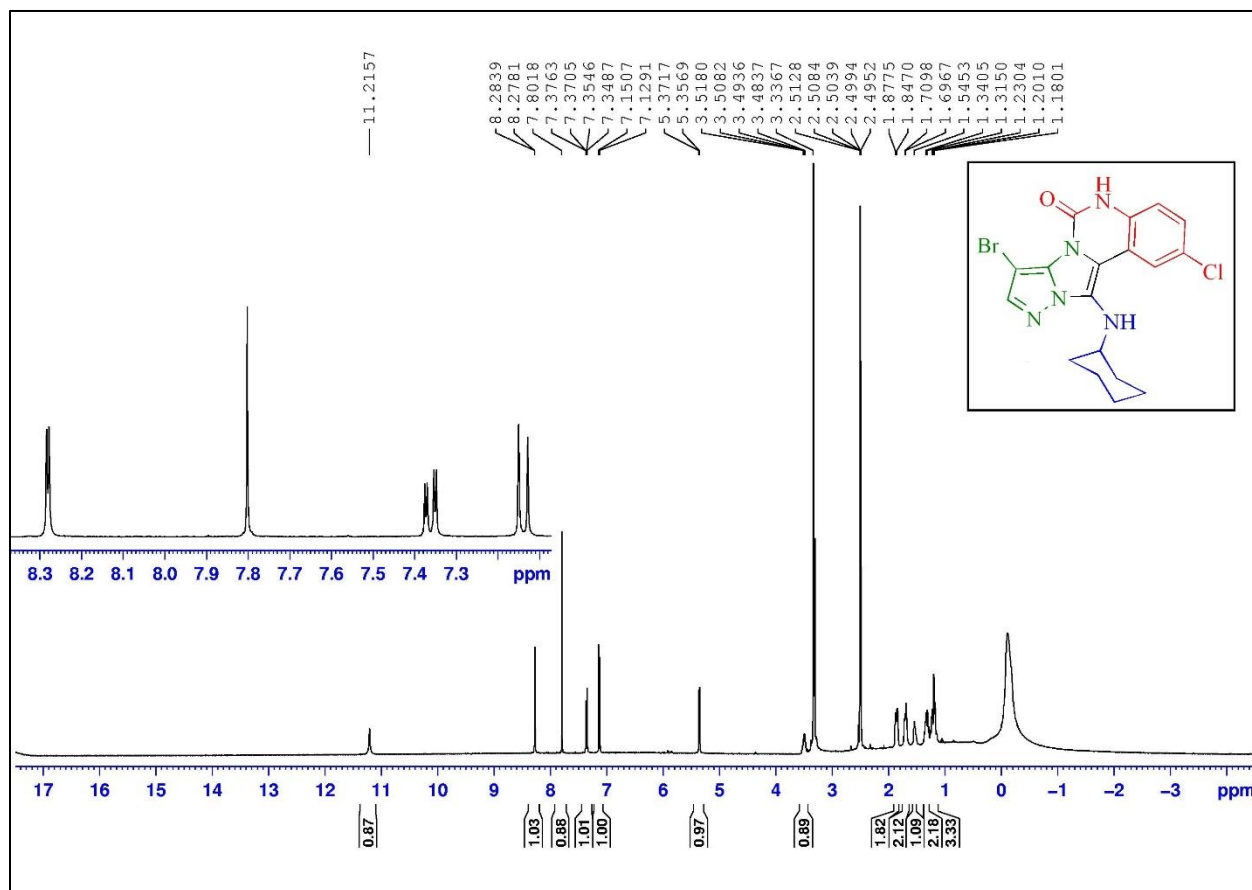

**Figure S67.** <sup>1</sup>H NMR spectrum of compound (4q) in DMSO.

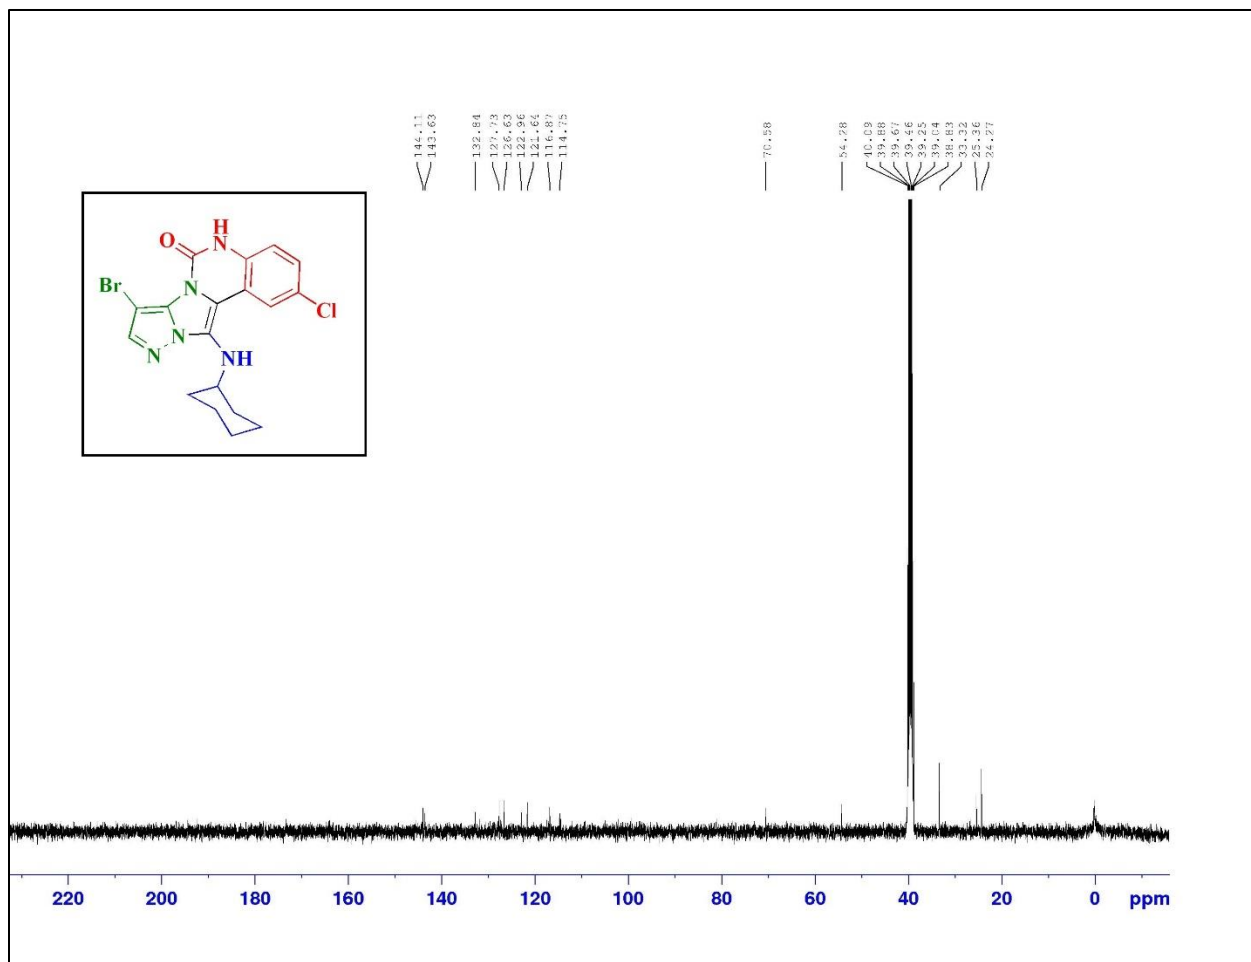

Figure S68.  $^{13}\text{C}$  NMR spectrum of compound (4q) in DMSO.

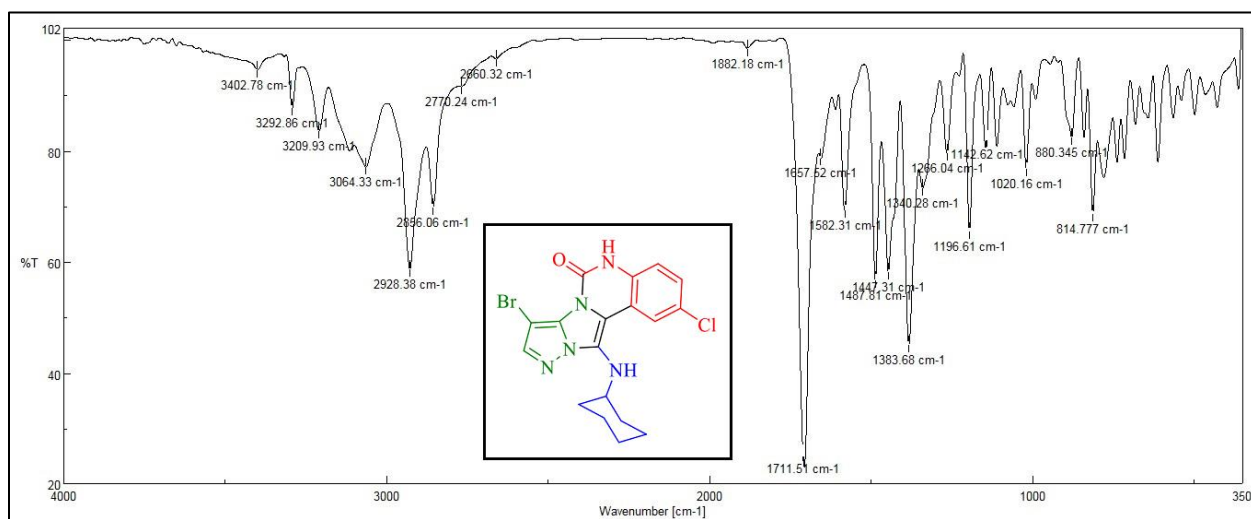

Figure S69. FT-IR spectrum of compound (4q).

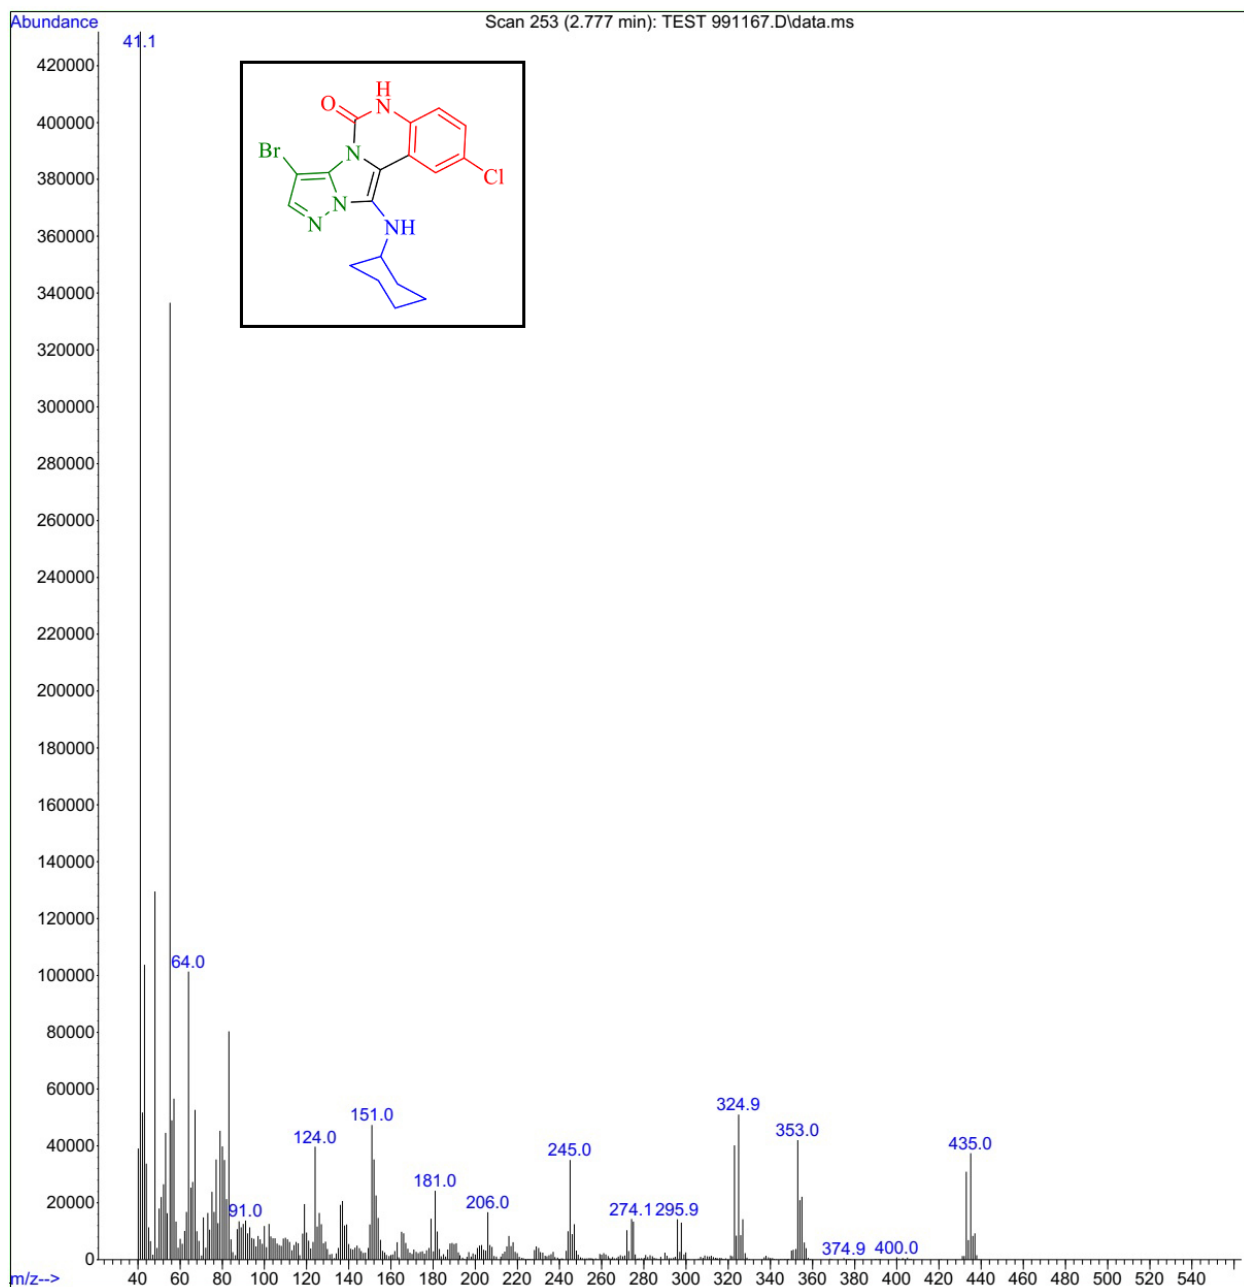

Figure S70. MASS spectrum of compound (4q).

**$^1\text{H}$  NMR,  $^{13}\text{C}$  NMR, FT-IR and MASS of compound (4r)**

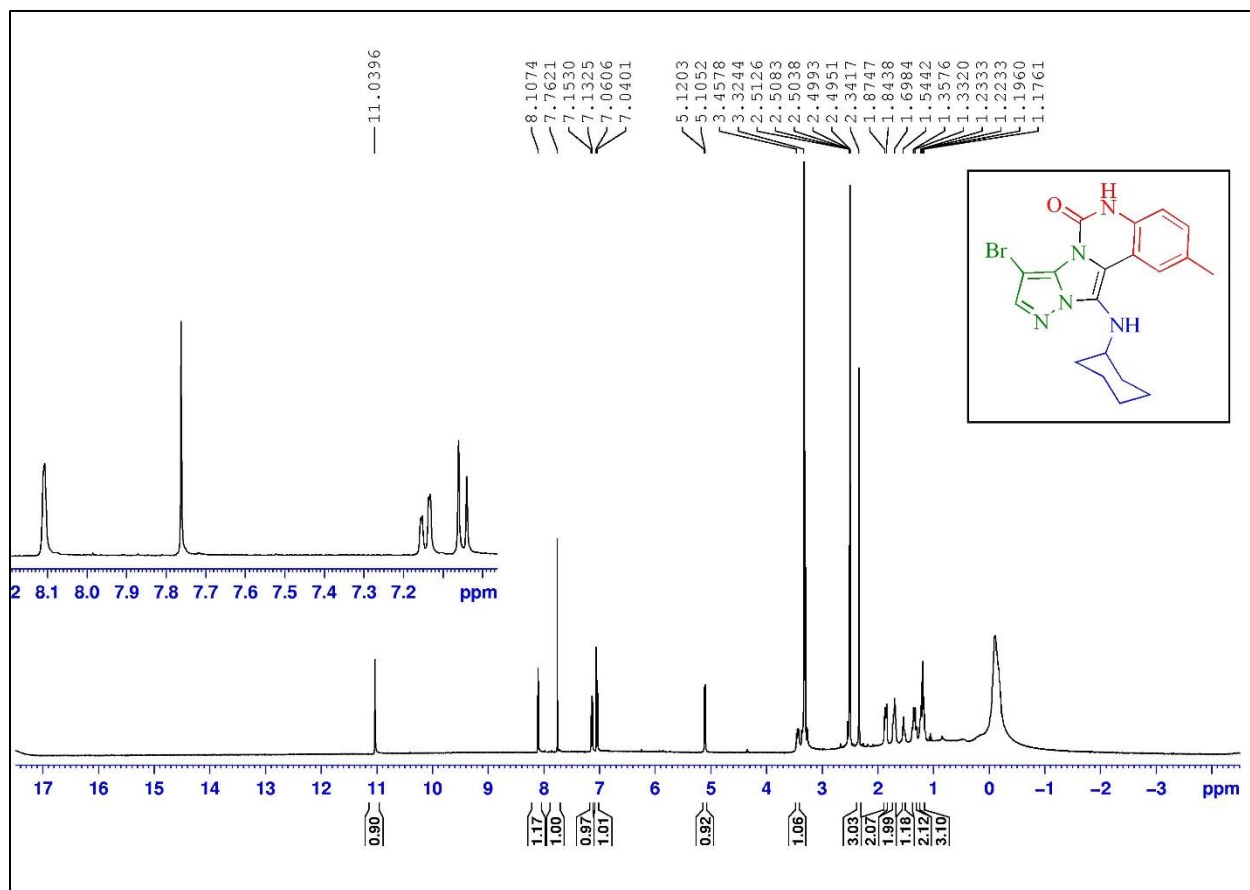

**Figure S71.**  $^1\text{H}$  NMR spectrum of compound (4r) in DMSO.

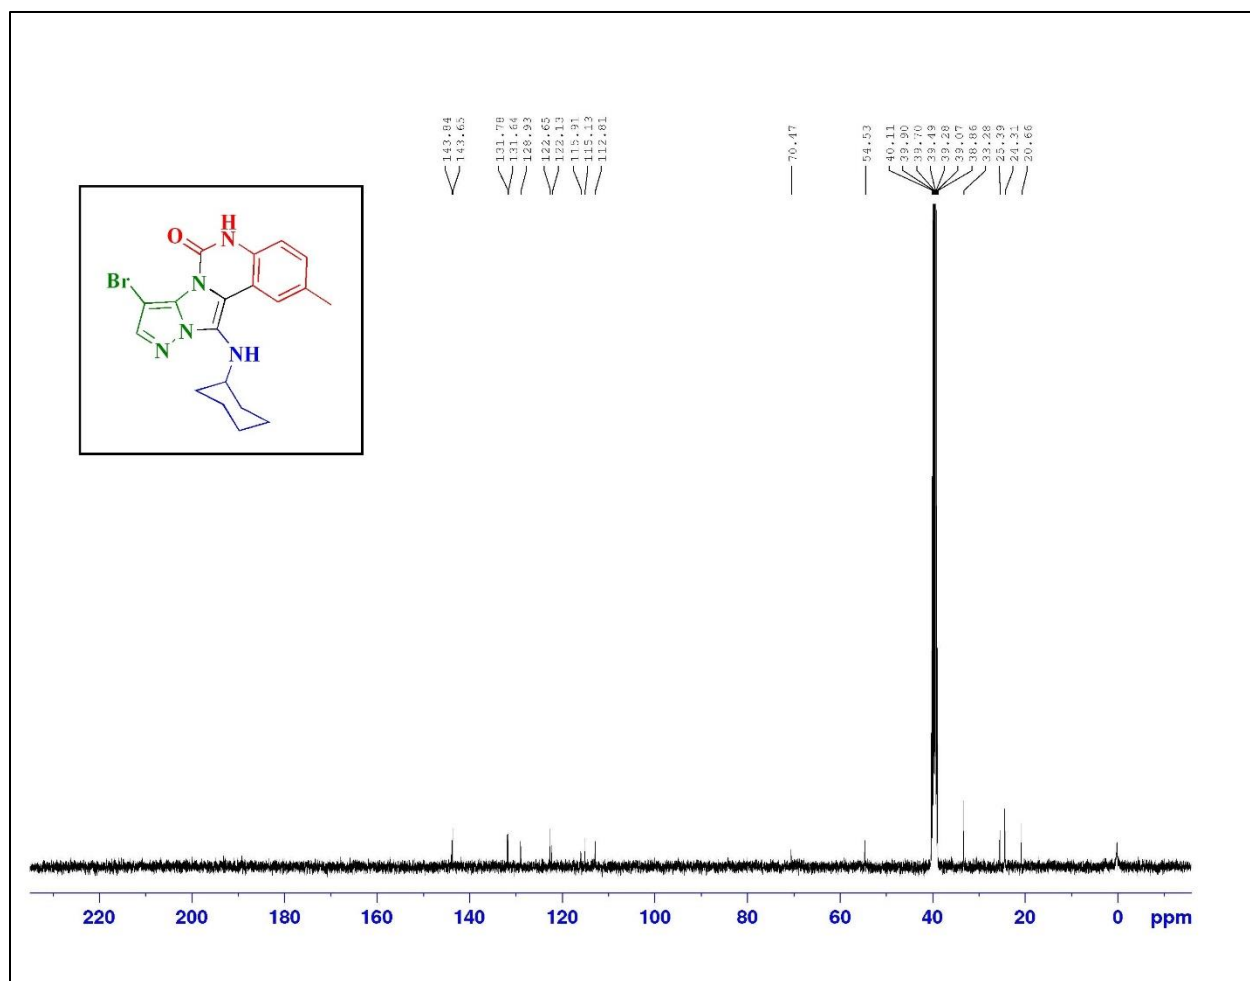

Figure S72.  $^{13}\text{C}$  NMR spectrum of compound (4r) in DMSO.

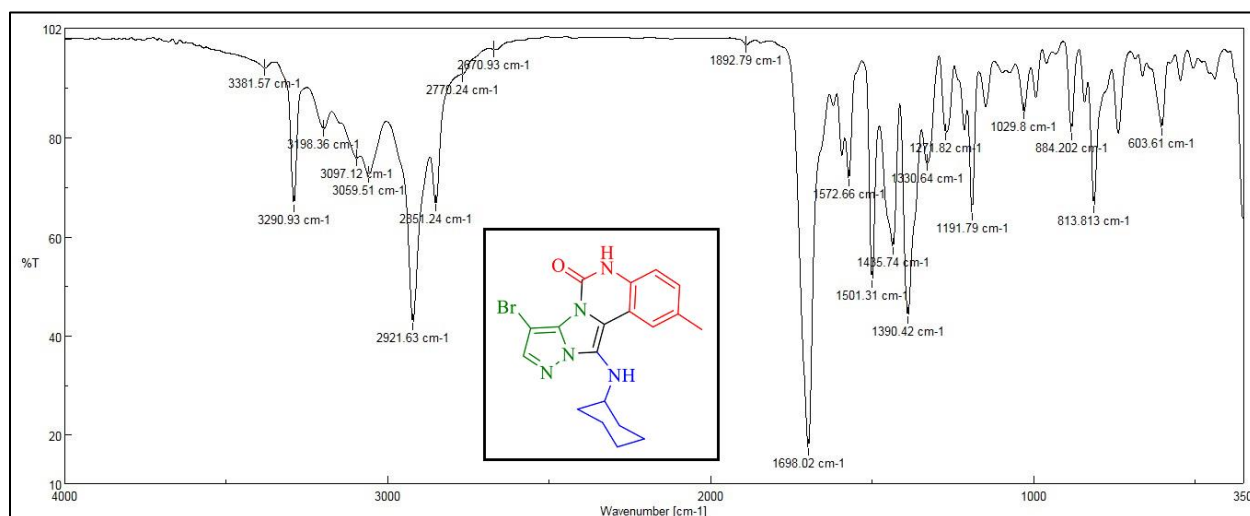

Figure S73. FT-IR spectrum of compound (4r).

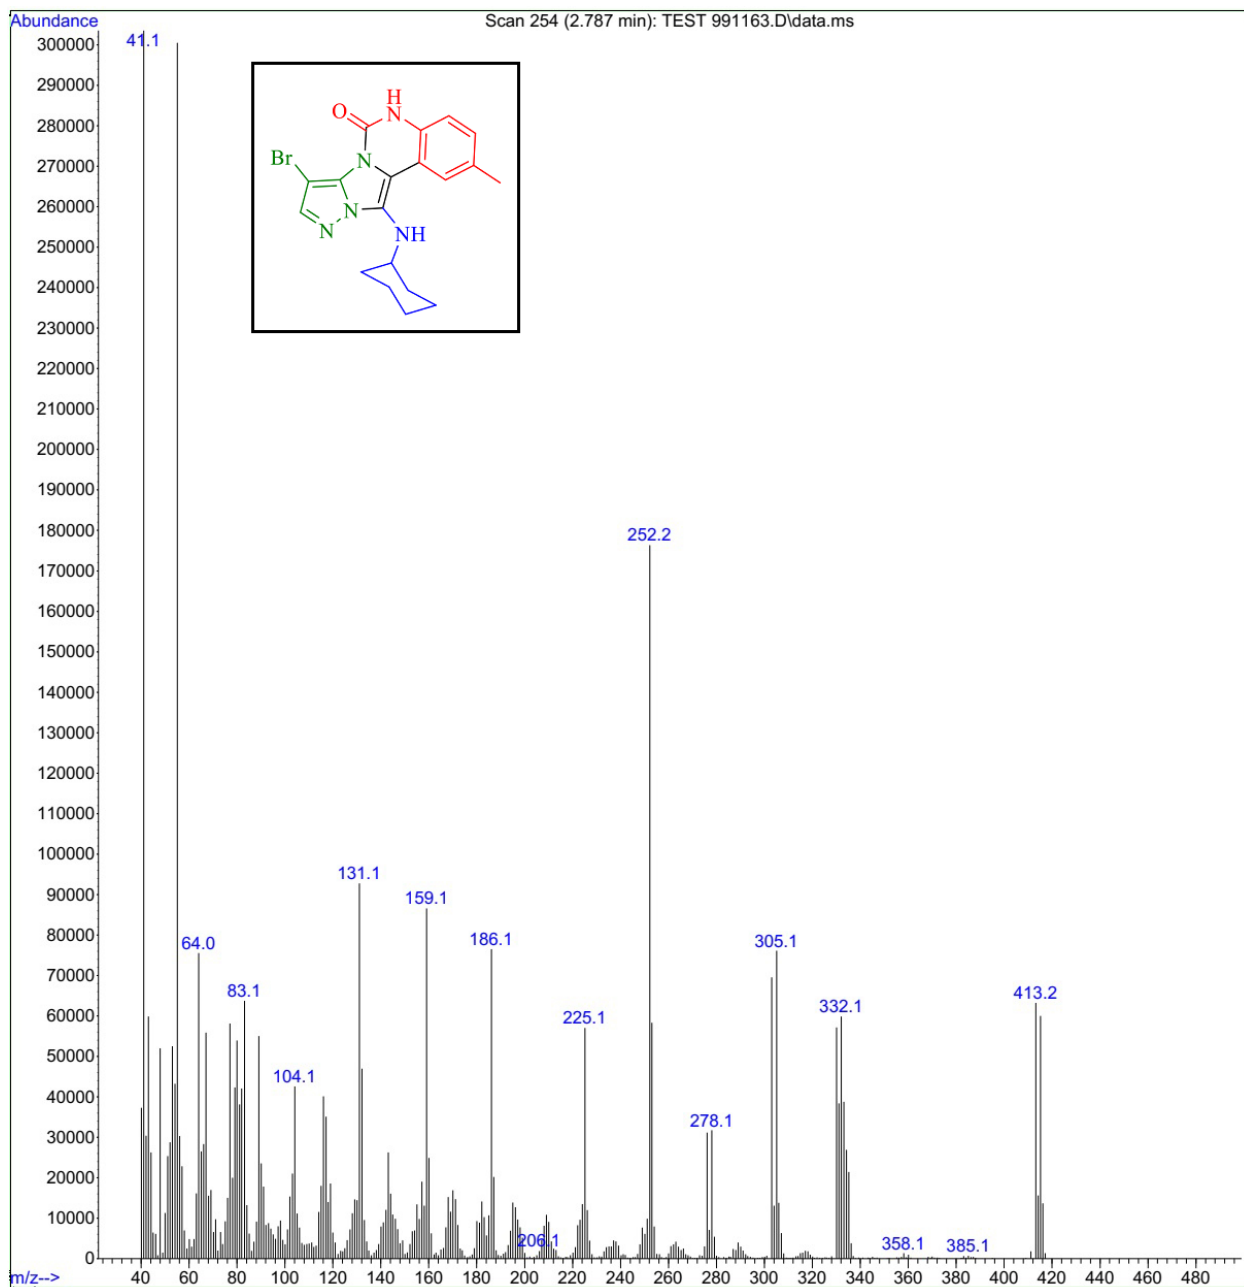

Figure S74. MASS spectrum of compound (4r).

**$^1\text{H}$  NMR,  $^{13}\text{C}$  NMR, FT-IR and MASS of compound (4s)**

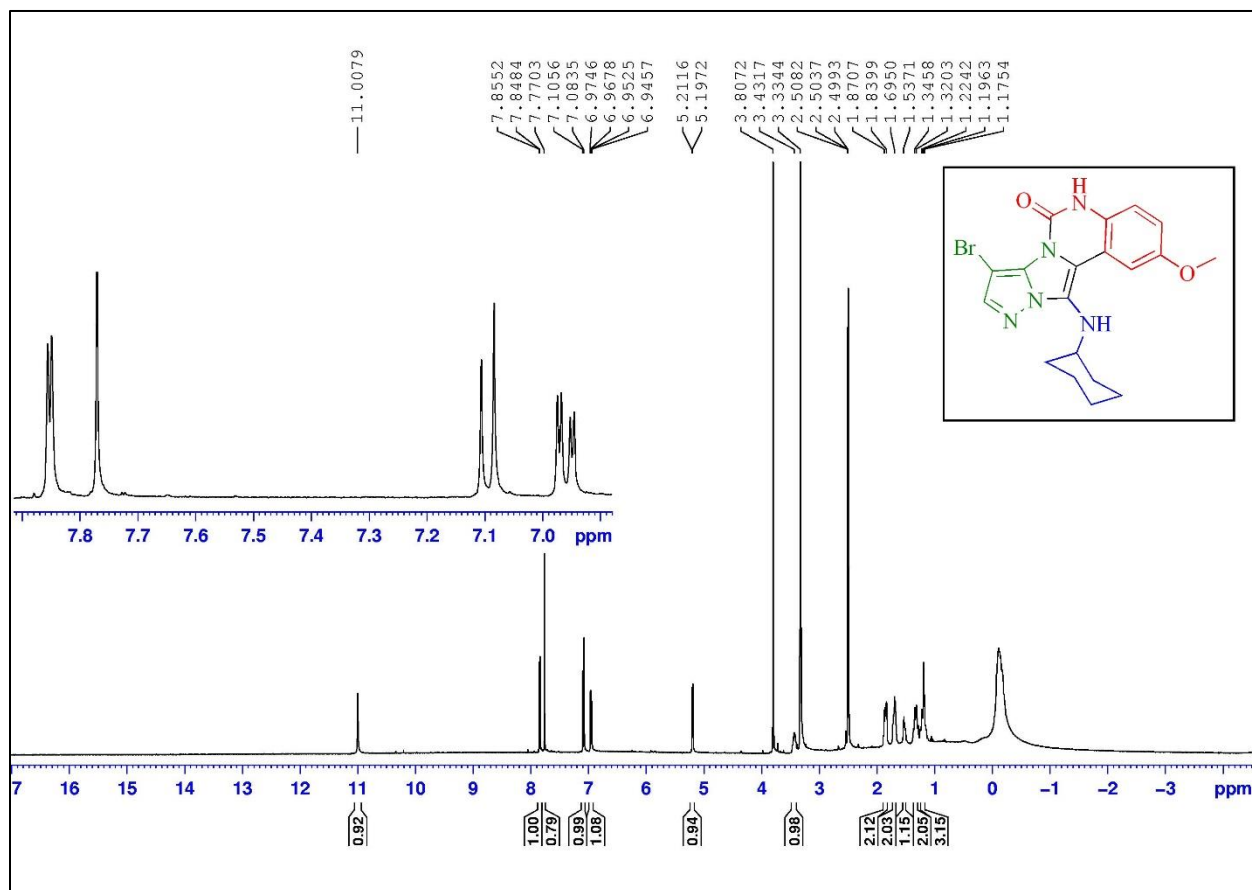

**Figure S75.**  $^1\text{H}$  NMR spectrum of compound (4s) in DMSO.

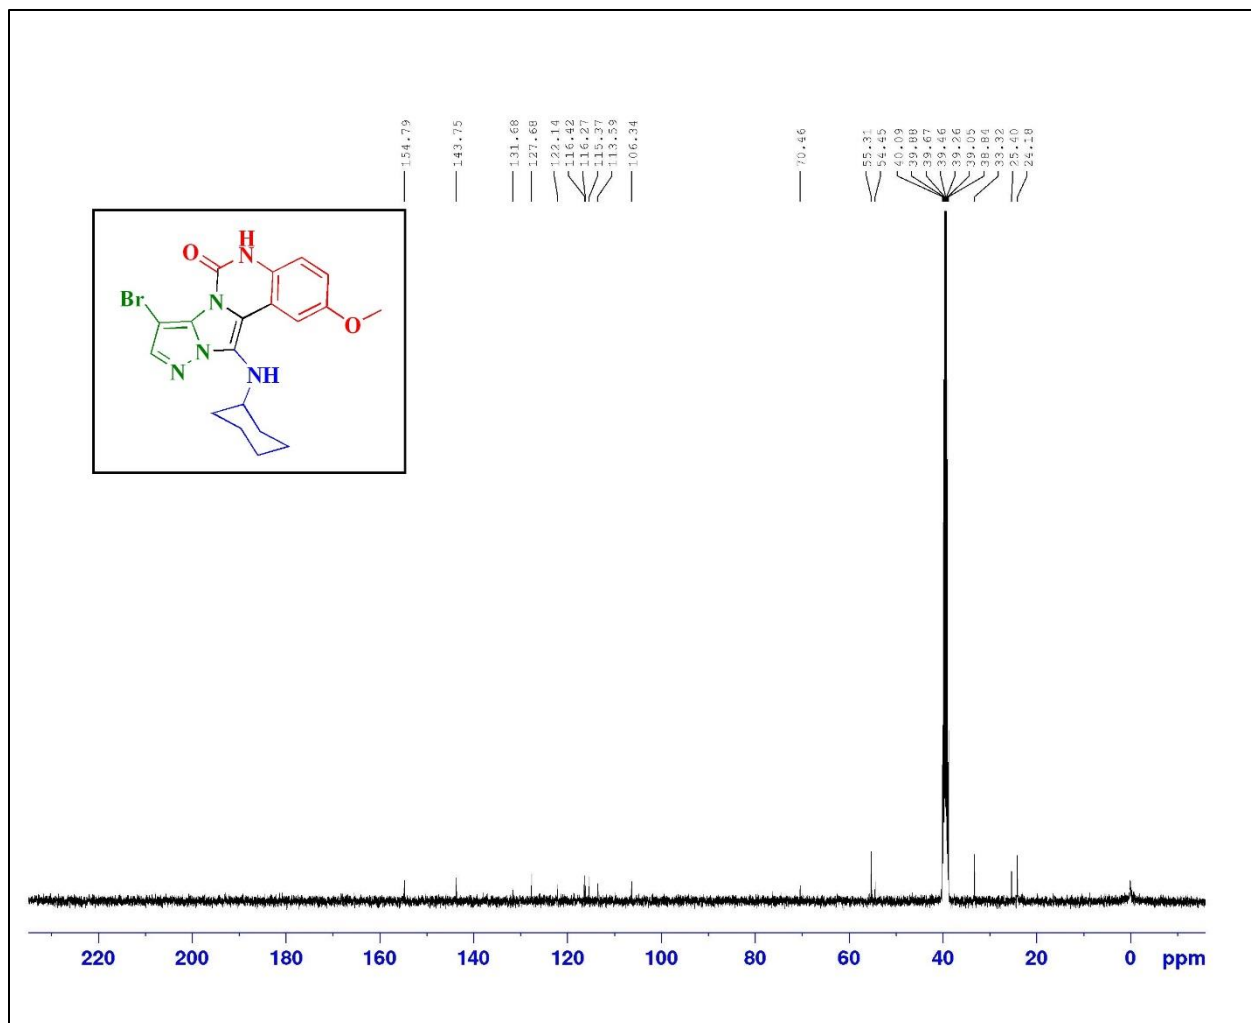

Figure S76. <sup>13</sup>C NMR spectrum of compound (4s) in DMSO.

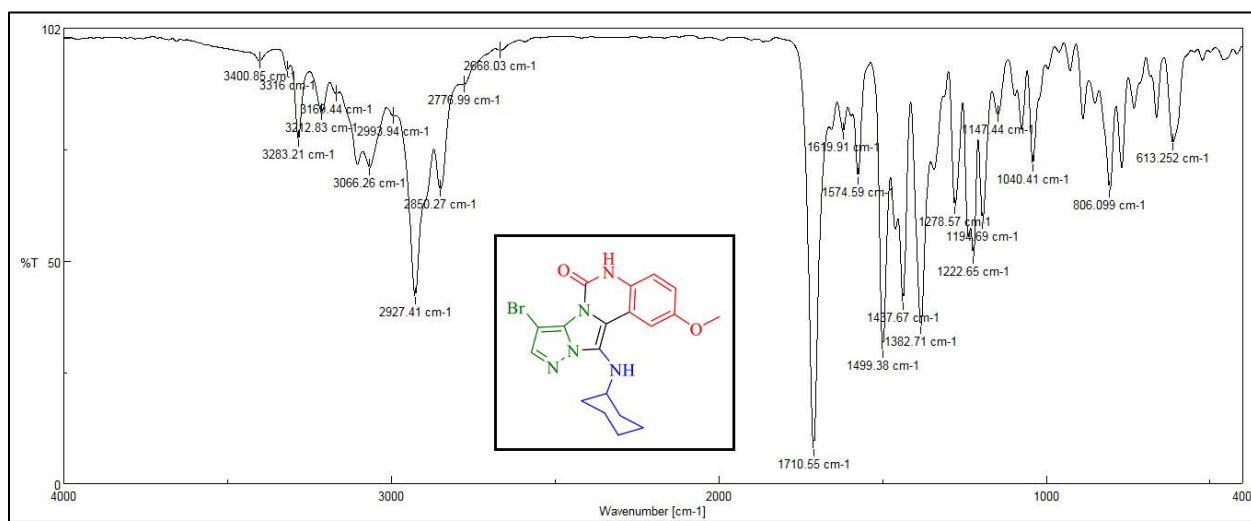

Figure S77. FT-IR spectrum of compound (4s).



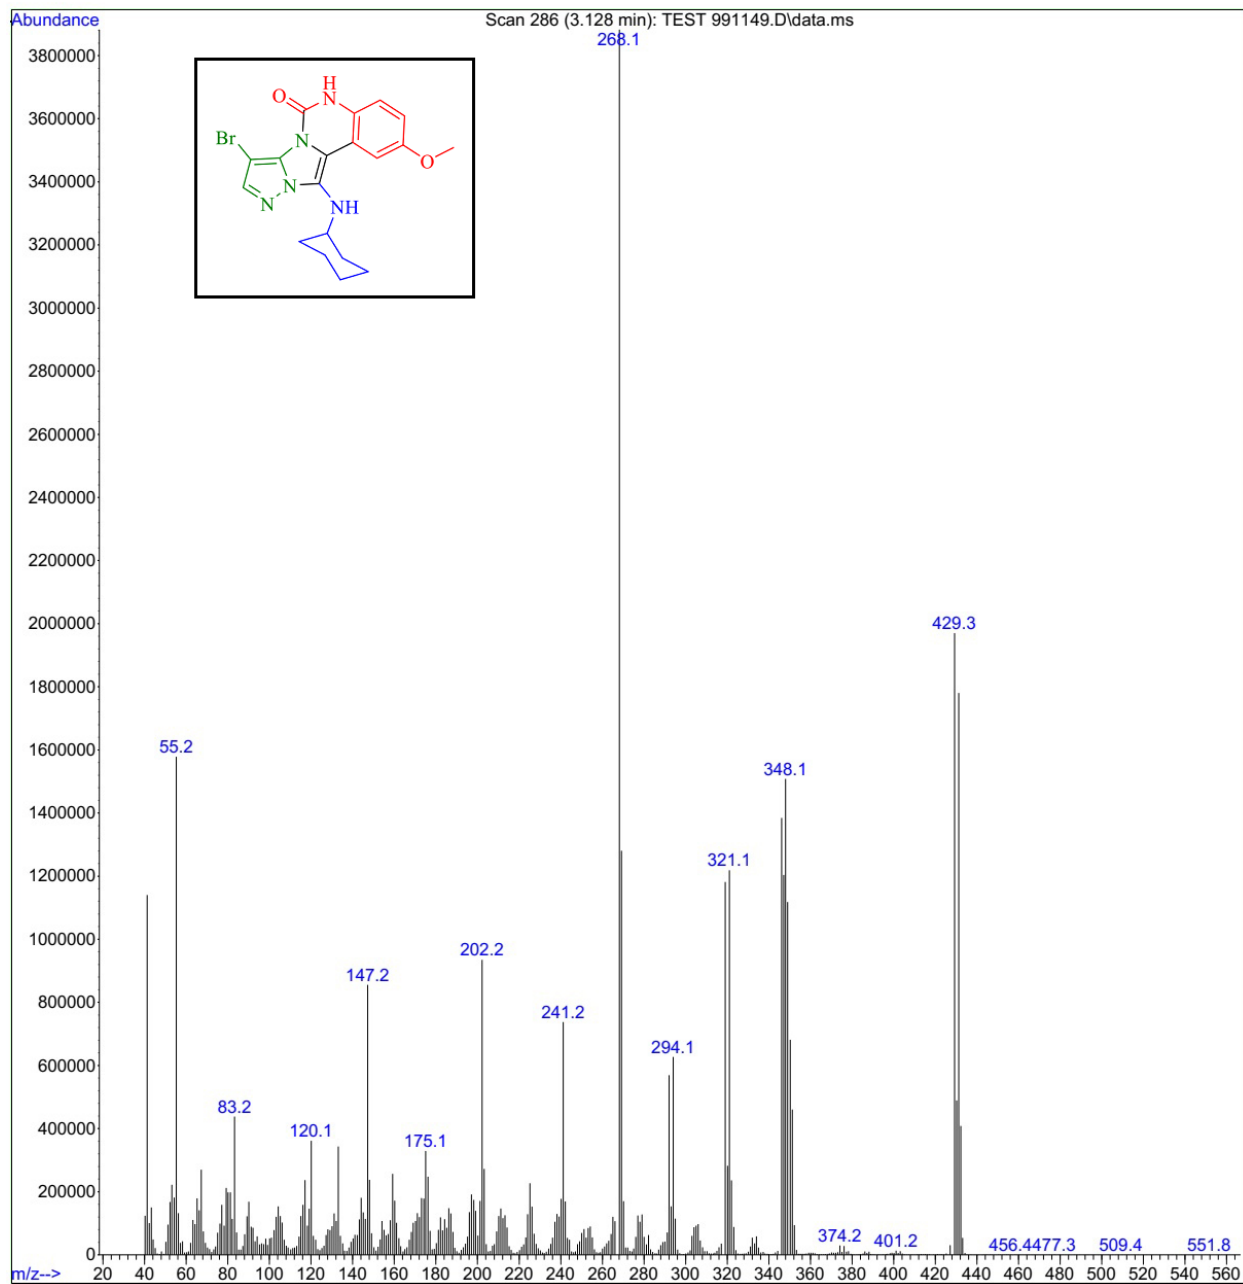

Figure S78. MASS spectrum of compound (4s).

**$^1\text{H}$  NMR,  $^{13}\text{C}$  NMR, FT-IR and MASS of compound (4t)**

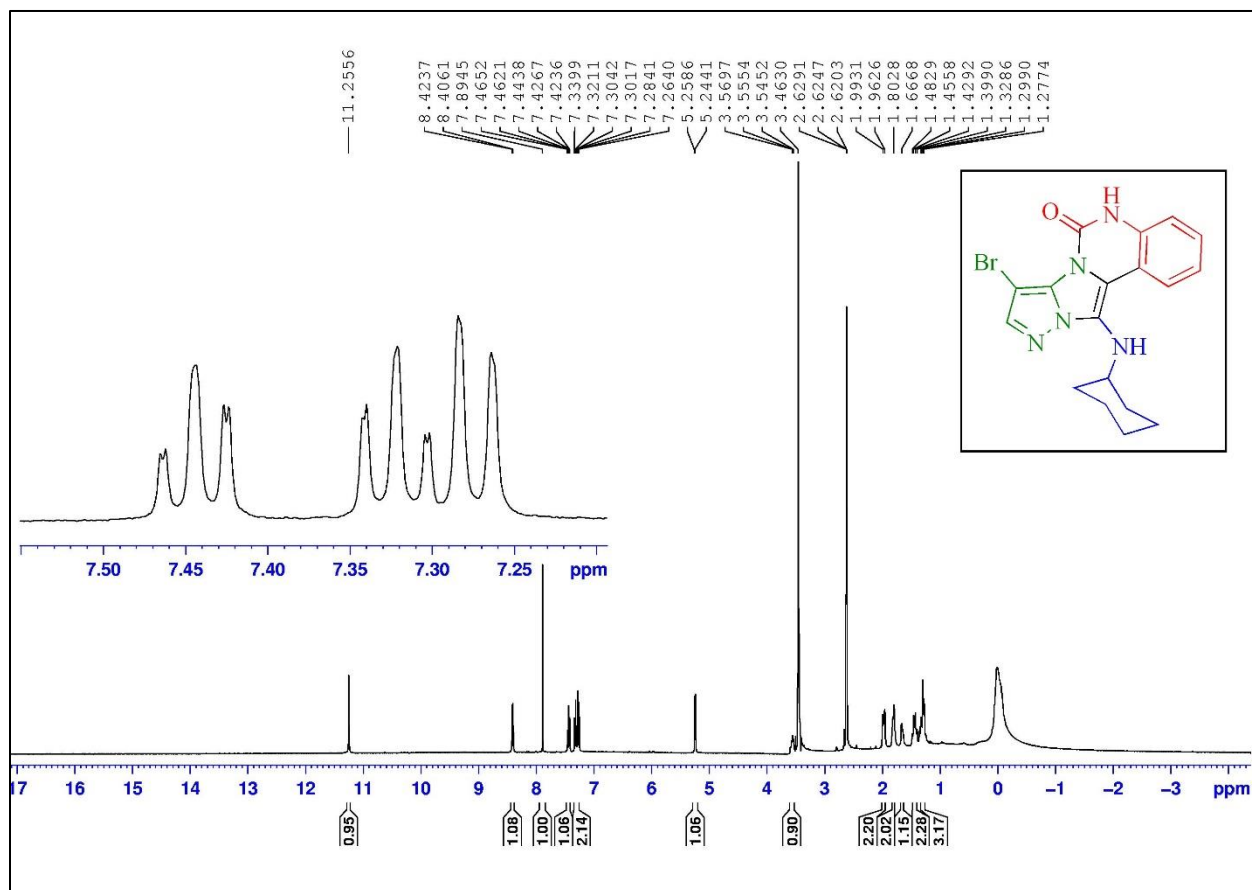

**Figure S79.**  $^1\text{H}$  NMR spectrum of compound (4t) in DMSO.

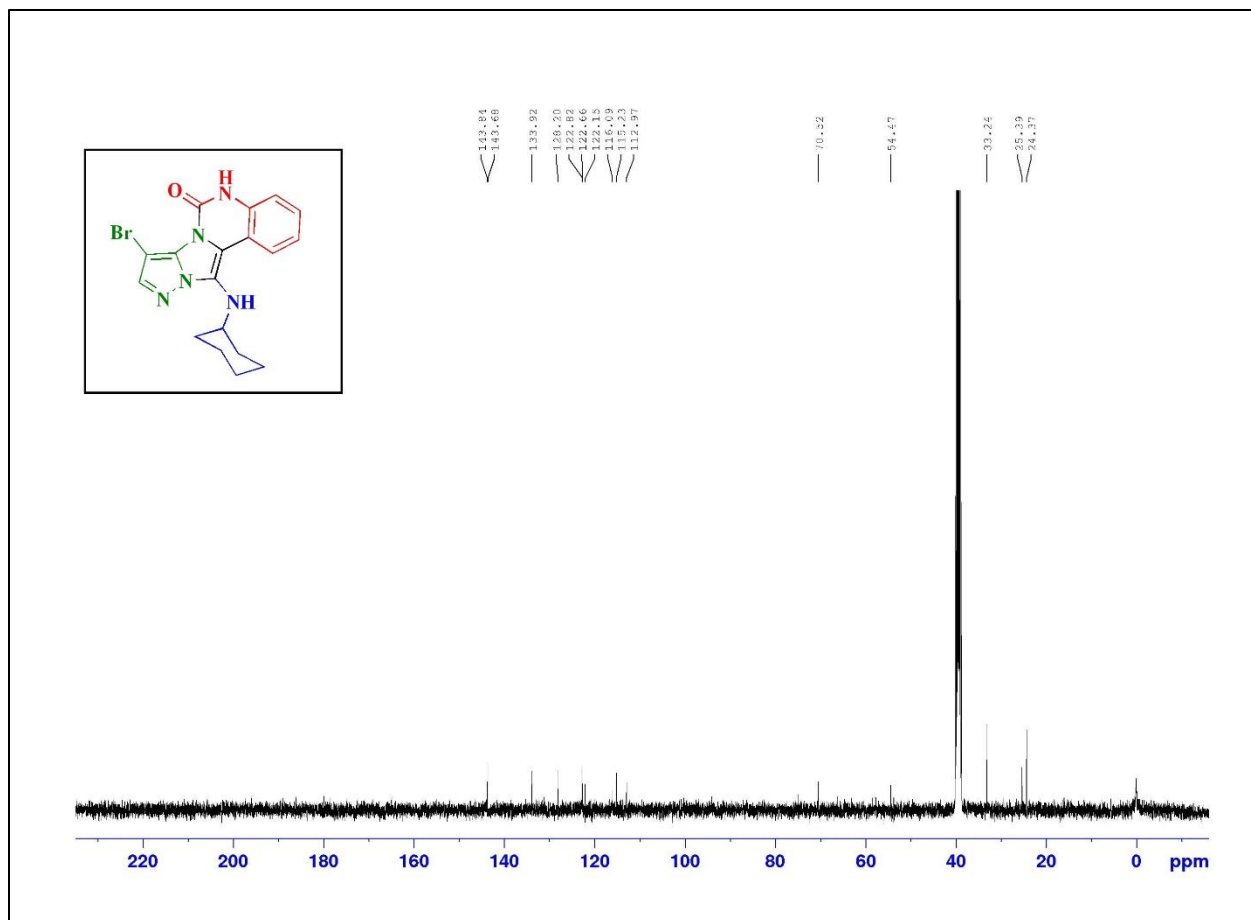

Figure S80. <sup>13</sup>C NMR spectrum of compound (4t) in DMSO.

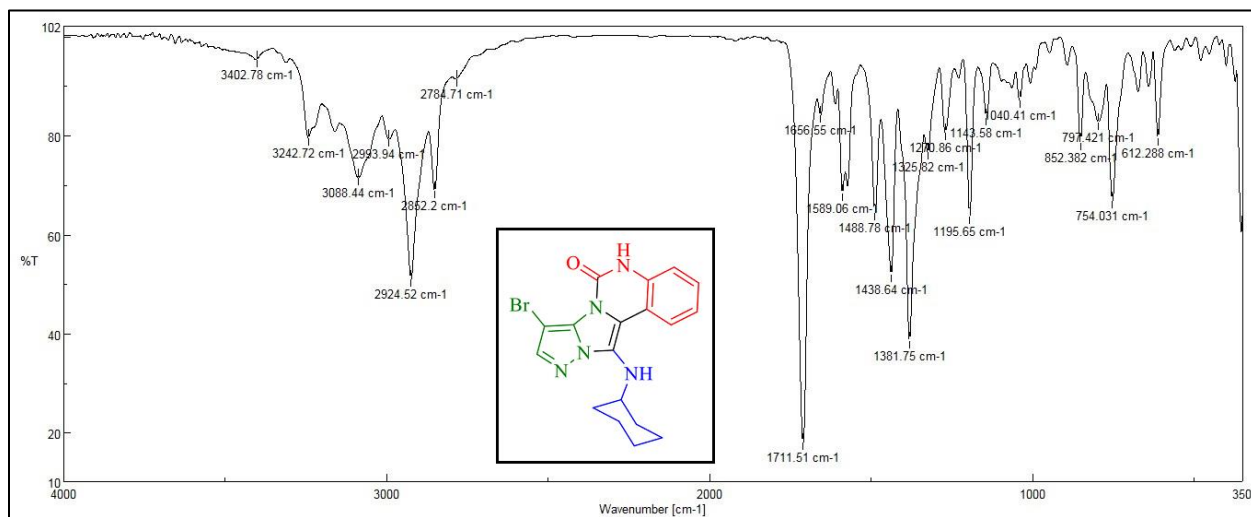

Figure S81. FT-IR spectrum of compound (4t).

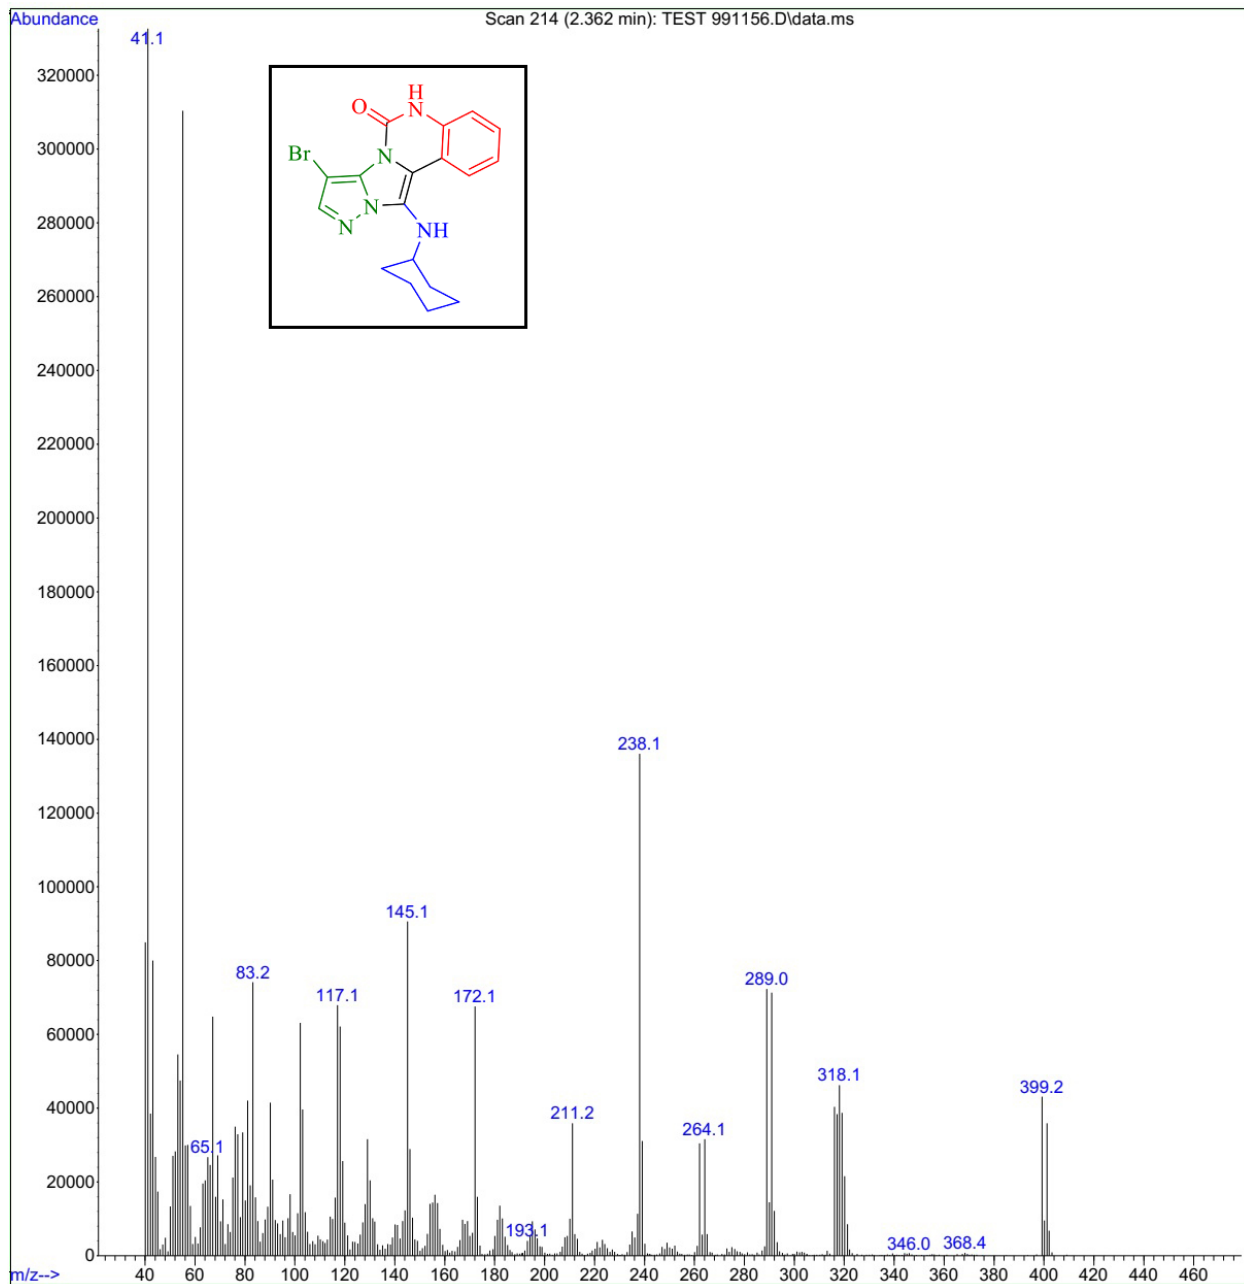

Figure S82. MASS spectrum of compound (4t).

**$^1\text{H}$  NMR,  $^{13}\text{C}$  NMR, FT-IR and MASS of compound (4u)**

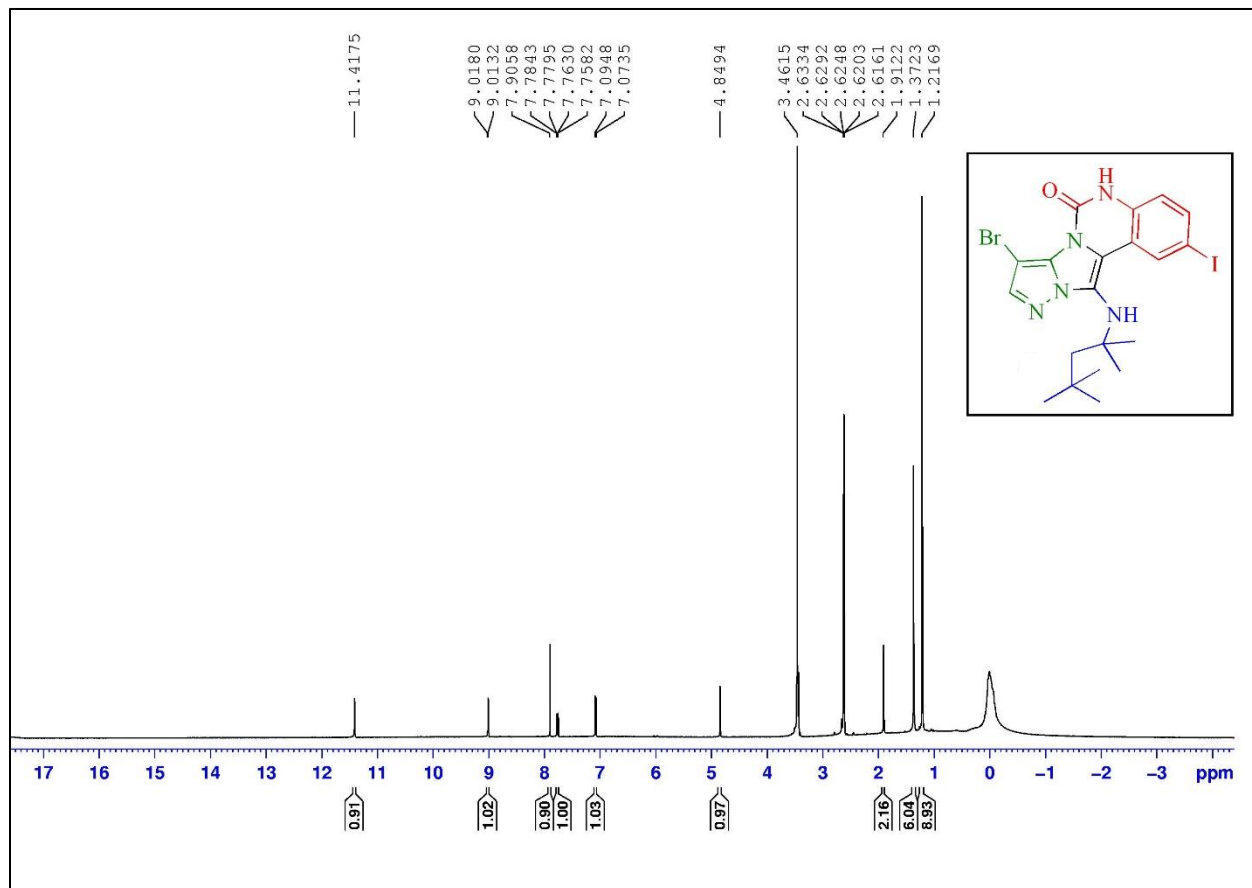

**Figure S83.**  $^1\text{H}$  NMR spectrum of compound (4u) in DMSO.

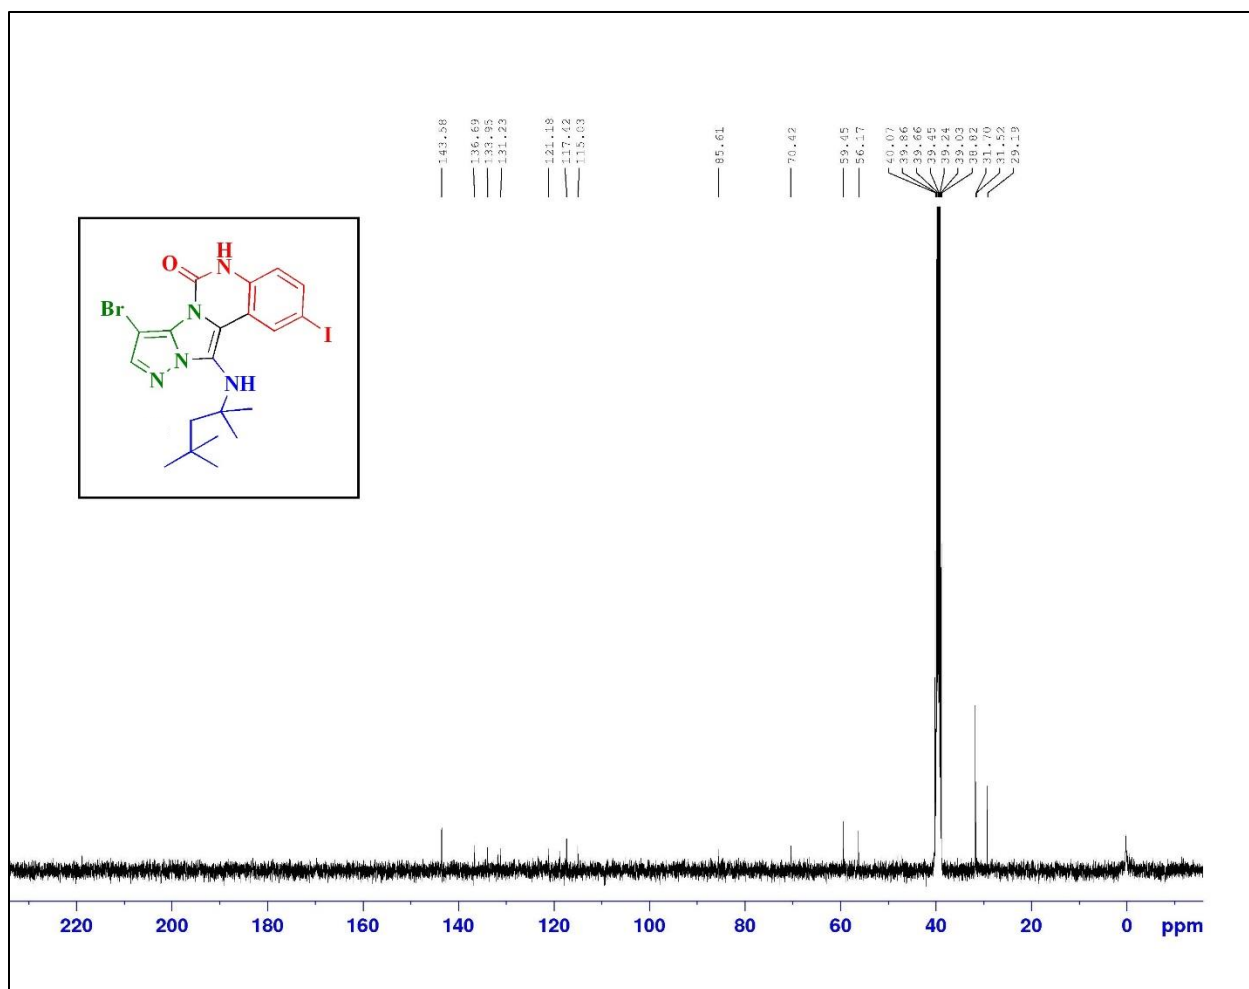

Figure S84.  $^{13}\text{C}$  NMR spectrum of compound (4u) in DMSO.

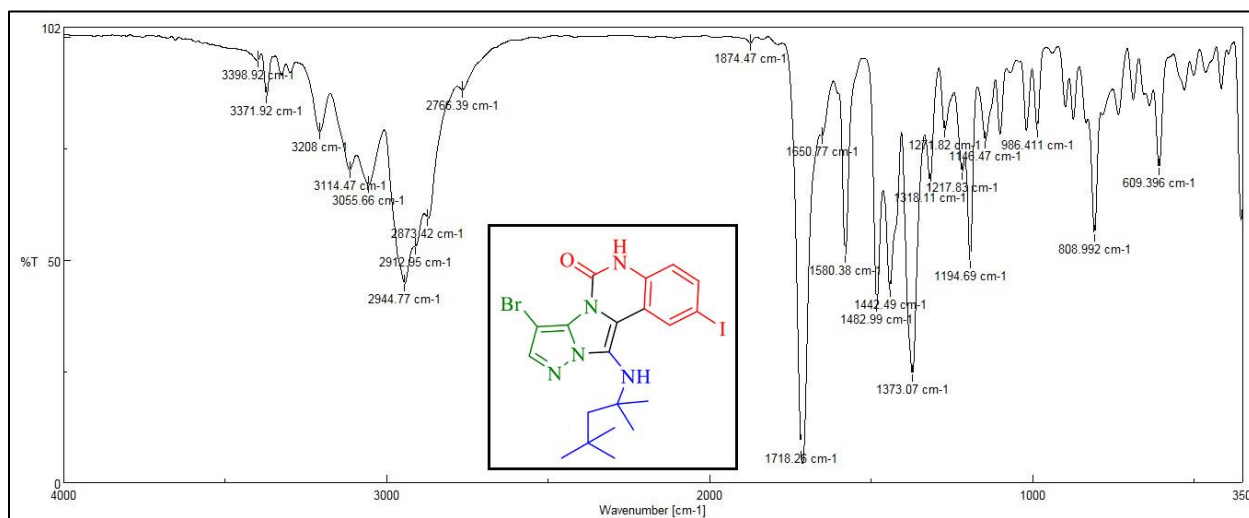

Figure S85. FT-IR spectrum of compound (4u).

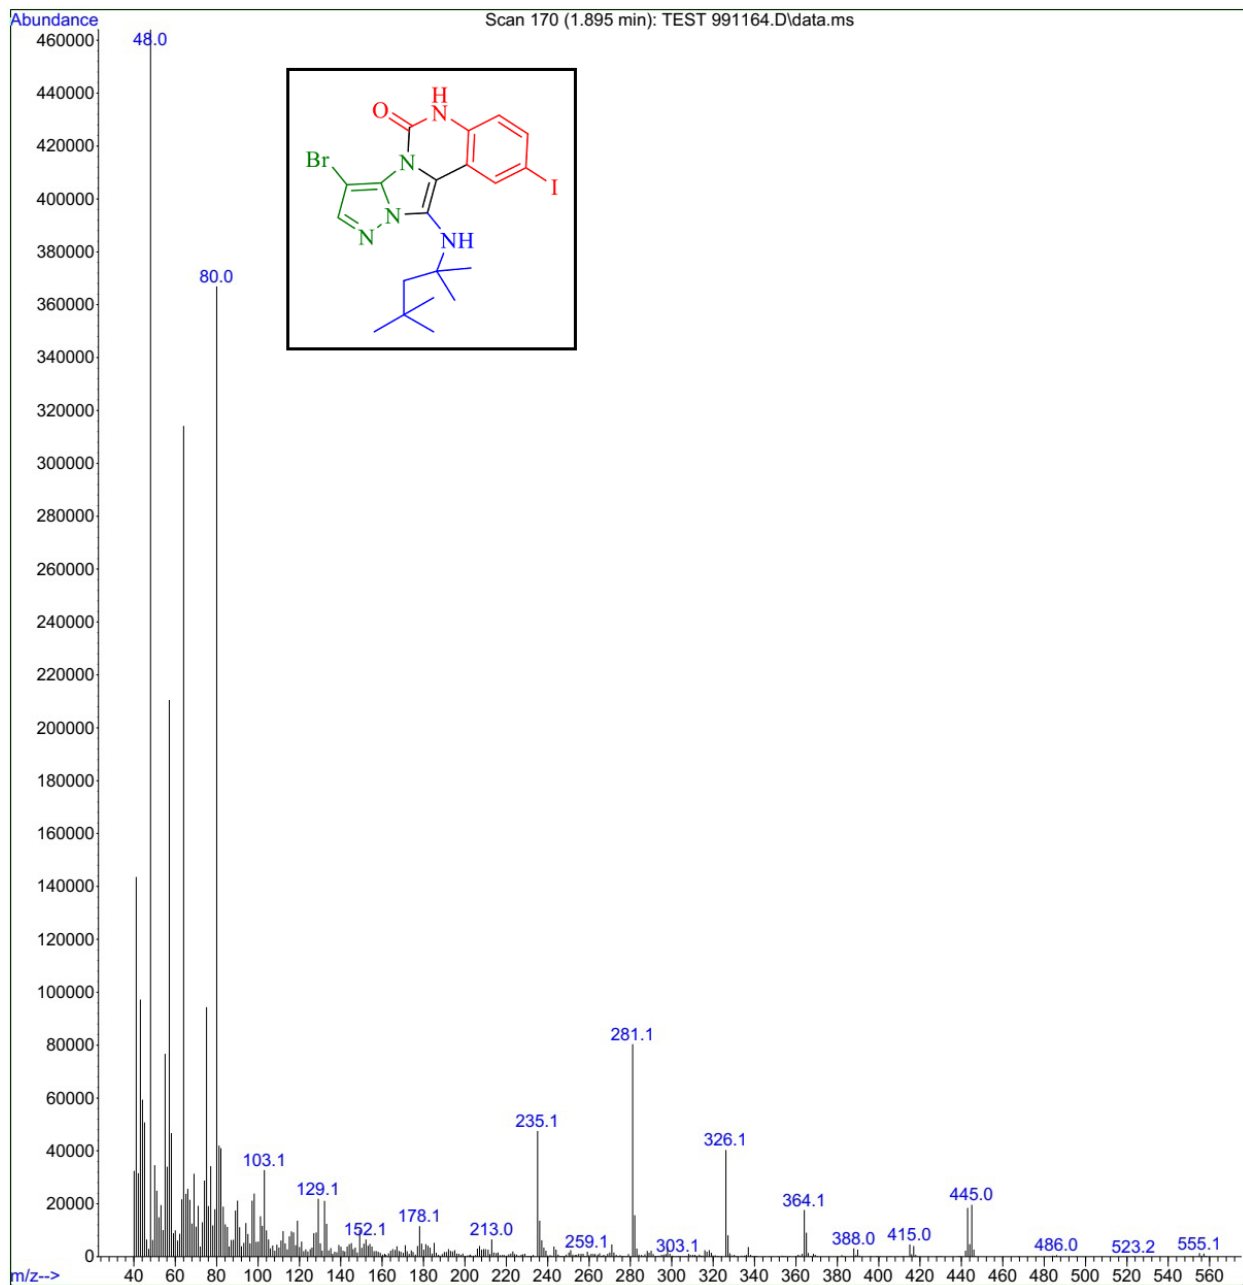

Figure S86. MASS spectrum of compound (4u).

**Table S1.** Molecular docking results for the interaction between Mpro and compounds 4a-4f.

| <b>Compound</b> | <b>Energy (kcal/mol)</b> | <b>Hydrogen Bond</b>              | <b>Halogen Bond</b> | <b>Hydrophobic Interaction</b>           |
|-----------------|--------------------------|-----------------------------------|---------------------|------------------------------------------|
| 4a              | -8.30                    | THR26, ASN142,<br>GLY143, CYS145  | -                   | THR25, PHE140, GLU166,<br>VAL309, LEU310 |
| 4b              | -8.44                    | THR26, ASN142,<br>GLY143, CYS145  | -                   | THR25, PHE140, GLU166,<br>VAL309, LEU310 |
| 4c              | -8.26                    | THR26, ASN142,<br>GLY143, CYS145  | -                   | THR25, PHE140, GLU166,<br>VAL309, LEU310 |
| 4d              | -8.05                    | THR26, ASN142,<br>GLY143, CYS145  | -                   | THR25, PHE140, GLU166,<br>VAL309, LEU310 |
| 4e              | -8.13                    | THR26, ASN142,<br>GLY143, CYS145  | -                   | THR25, PHE140, GLU166,<br>VAL309         |
| 4f              | -8.22                    | SER144, HIS163,<br>GLY143, CYS145 | -                   | THR25, PHE140, GLU166,<br>VAL309         |



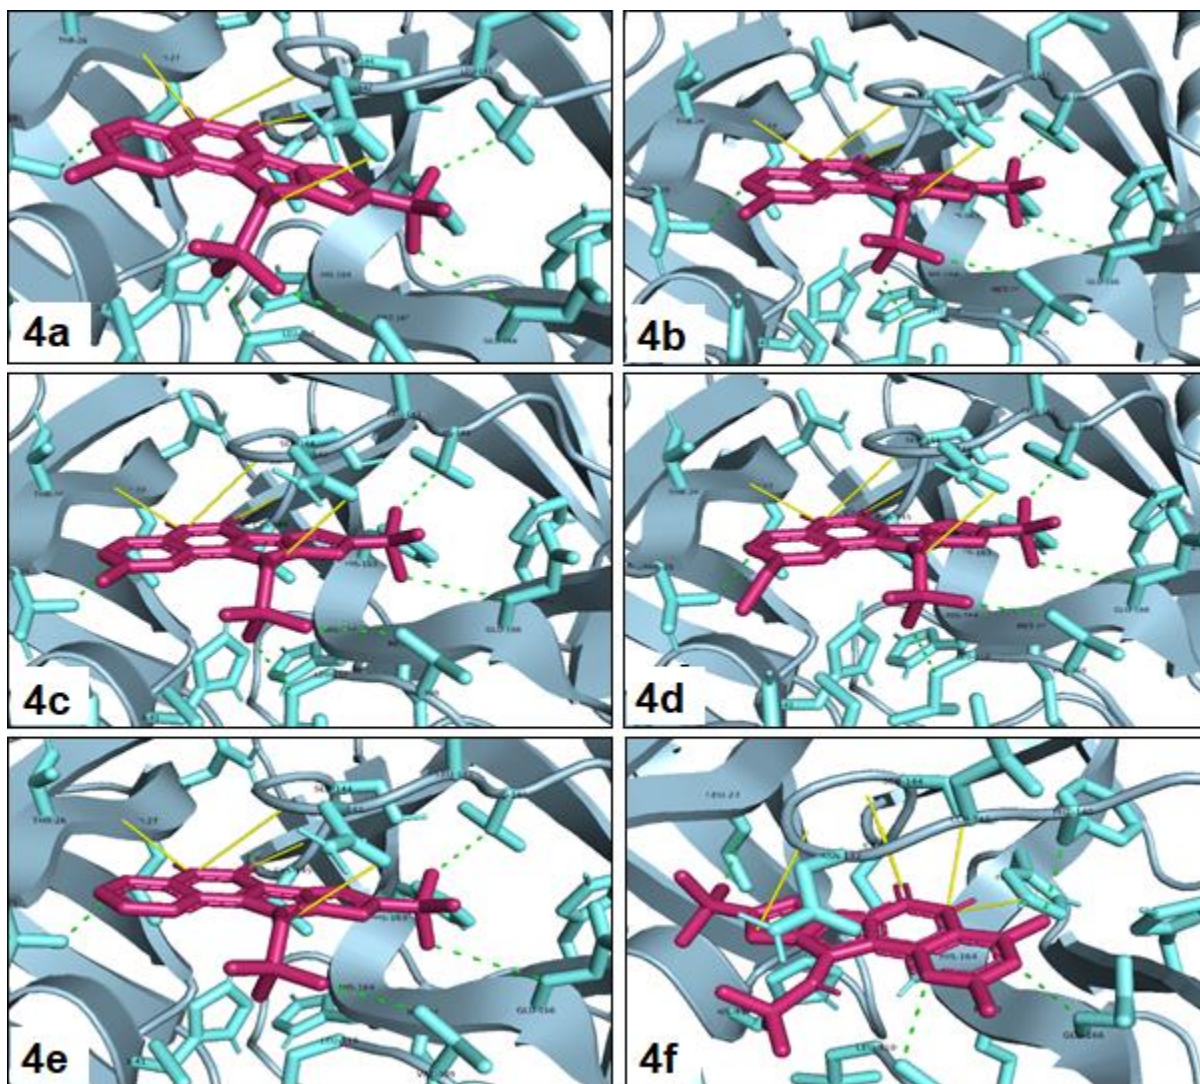

**Figure S87.** View of the Mpro binding site (Cys145-His41) for compounds 4a-4f. image of hydrophobic interaction, hydrogen and halogen bonds for ligands (yellow, green and blue color indication H-bond, hydrophobic interaction and halogen bond, respectively) that prepared by pymol software.

**Table S2.** Molecular docking results for the interaction between Mpro and compounds 4g-4k.

| <b>Compound</b> | <b>Energy (kcal/mol)</b> | <b>Hydrogen Bond</b>              | <b>Halogen Bond</b> | <b>Hydrophobic Interaction</b> |
|-----------------|--------------------------|-----------------------------------|---------------------|--------------------------------|
| 4g              | -7.96                    | GLY143, SER144,<br>CYS145         | -                   | PHE140, GLU166                 |
| 4h              | -8.22                    | GLY143, SER144,<br>CYS145         | -                   | PHE140                         |
| 4i              | -7.90                    | ASN142, GLY143,<br>SER144, CYS145 | -                   | PHE140, GLU166                 |
| 4j              | -8.18                    | GLY143, SER144,<br>CYS145         | -                   | PHE140, GLU166                 |
| 4k              | -8.28                    | ASN142, GLY143,<br>SER144, CYS145 | -                   | PHE140                         |

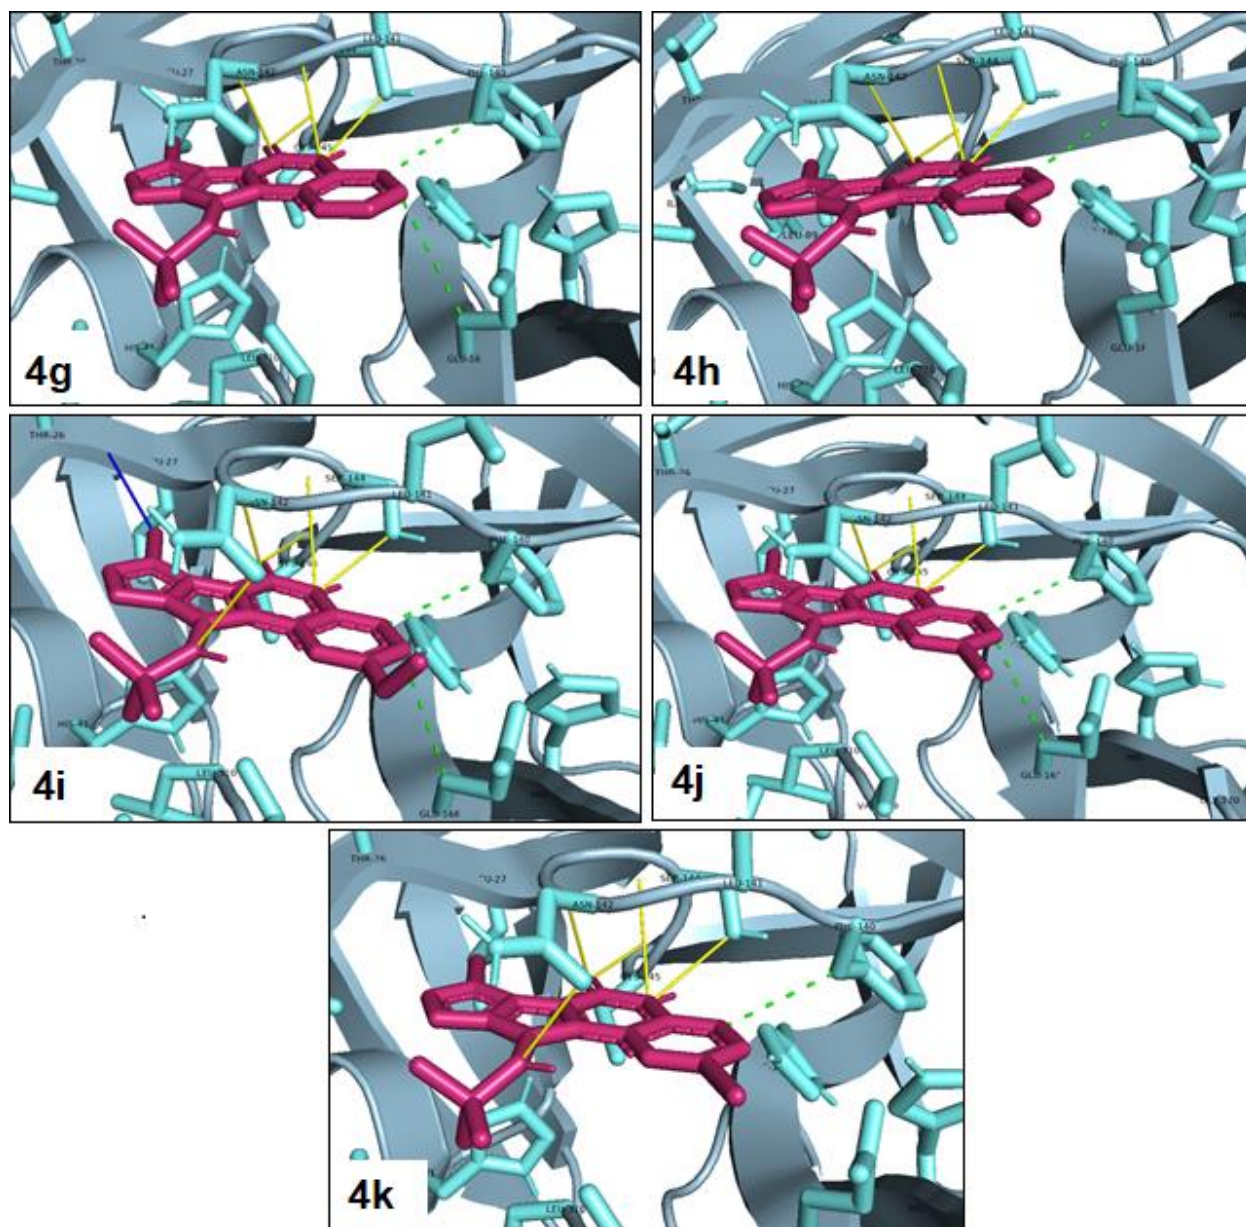

**Figure S88.** View of the Mpro binding site (Cys145-His41) for compounds 4g-4k. image of hydrophobic interaction, hydrogen and halogen bonds for ligands (yellow, green and blue color indication H-bond, hydrophobic interaction and halogen bond, Respectively) that prepared by pymol software.

**Table S3.** Molecular docking results for the interaction between Mpro and compounds 4l-4p.

| <b>Compound</b> | <b>Energy (kcal/mol)</b> | <b>Hydrogen Bond</b>              | <b>Halogen Bond</b> | <b>Hydrophobic Interaction</b>   |
|-----------------|--------------------------|-----------------------------------|---------------------|----------------------------------|
| 4l              | -8.51                    | SER144, ASN142,<br>GLY143, CYS145 | -                   | THR25, PHE140, GLU166            |
| 4m              | <b>-8.63</b>             | SER144, GLY143,<br>CYS145         | -                   | THR25, PHE140, GLU166            |
| 4n              | -8.39                    | SER144, ASN142,<br>GLY143, CYS145 | -                   | THR25, PHE140, GLU166            |
| 4o              | -8.41                    | HIS163, SER144,<br>GLY143, CYS145 | -                   | THR25, THR26, GLU166,<br>PHE140  |
| 4p              | -7.62                    | ASN142, GLY143                    | -                   | LEU27, PHE140, GLU166,<br>VAL309 |



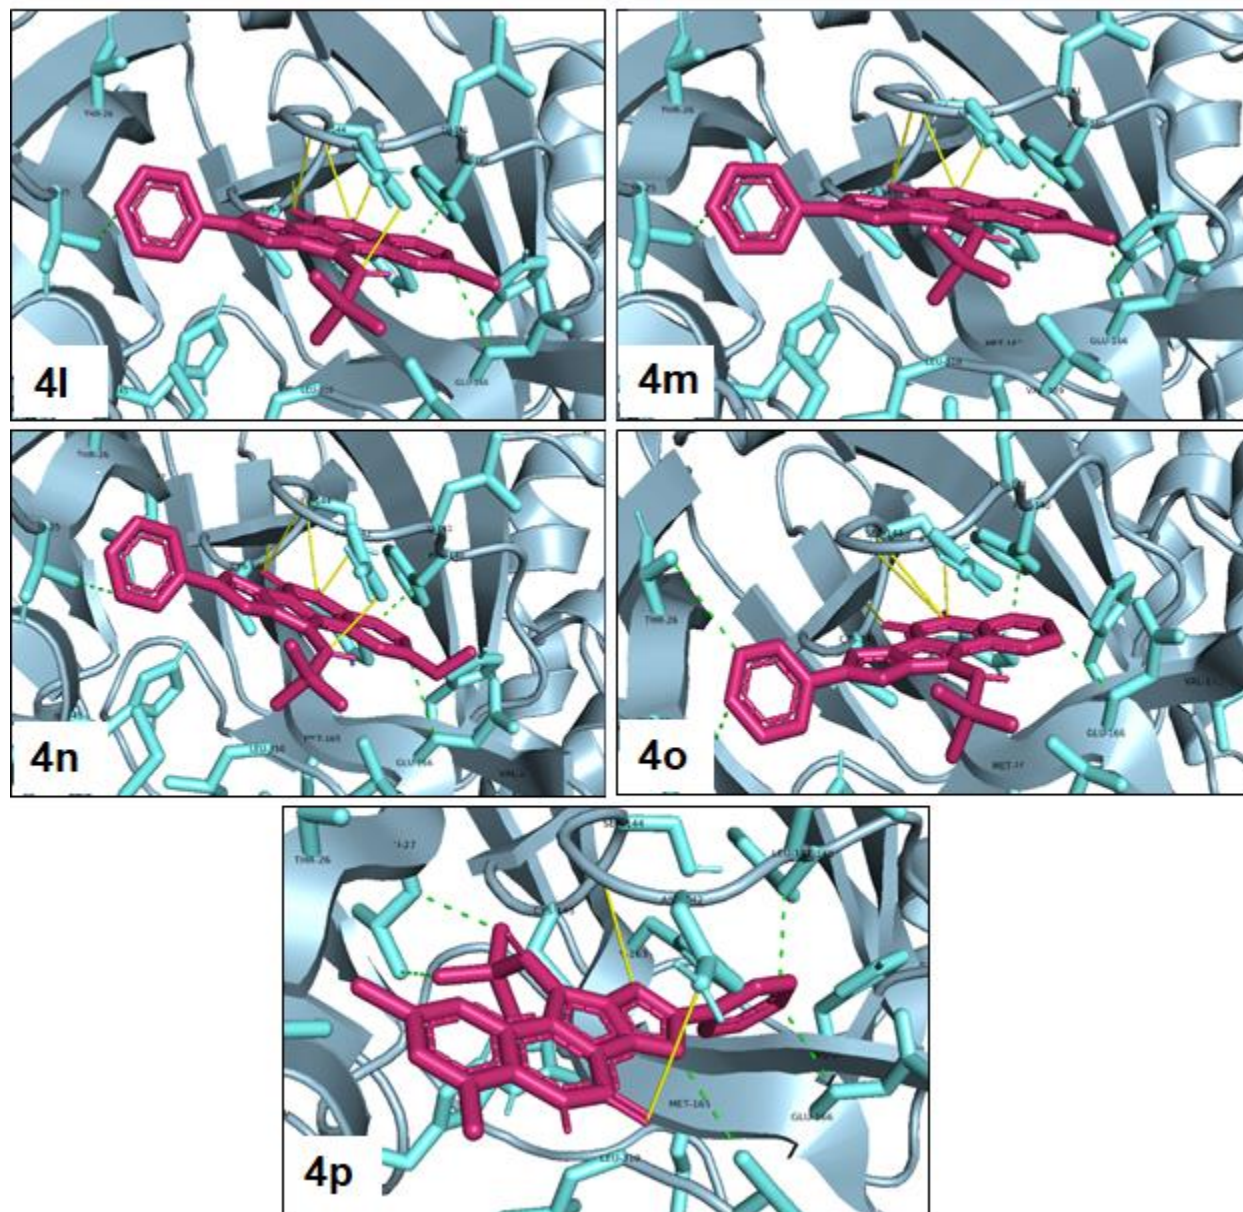

**Figure S89.** View of the Mpro binding site (Cys145-His41) for compounds 4l-4p. image of hydrophobic interaction, hydrogen and halogen bonds for ligands (yellow, green and blue color indication H-bond, hydrophobic interaction and halogen bond, Respectively) that prepared by pymol software.

**Table S4.** Molecular docking results for the interaction between Mpro and compounds 4q-4u.

| <b>Compound</b> | <b>Energy (kcal/mol)</b> | <b>Hydrogen Bond</b>              | <b>Halogen Bond</b> | <b>Hydrophobic Interaction</b> |
|-----------------|--------------------------|-----------------------------------|---------------------|--------------------------------|
| 4q              | <b>-8.73</b>             | ASN142, GLY143,<br>SER144, CYS145 | THR26               | PHE140, GLU166                 |
| 4r              | <b>-8.77</b>             | HIS163, GLY143,<br>SER144, CYS145 | THR26               | PHE140, GLU166                 |
| 4s              | -8.51                    | ASN142, GLY143,<br>SER144, CYS145 | THR26               | PHE140, GLU166                 |
| 4t              | -8.54                    | HIS163, GLY143,<br>SER144, CYS145 | THR26               | PHE140, GLU166                 |
| 4u              | -8.22                    | ASN142, GLY143,<br>SER144, CYS145 | -                   | PHE140, GLU166, VAL309         |

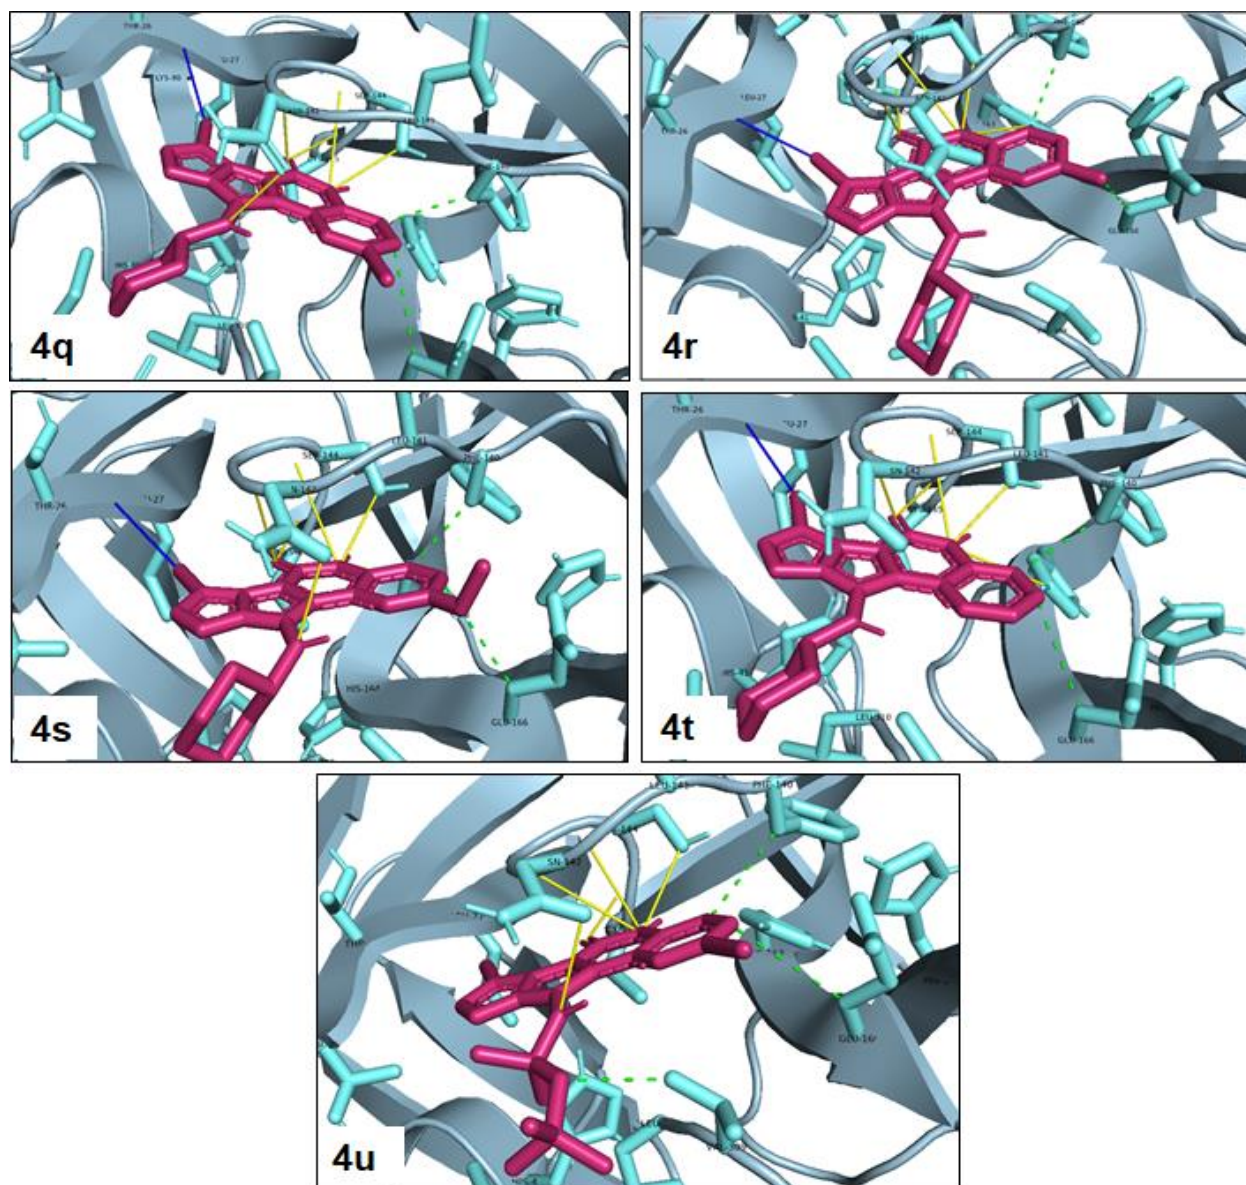

**Figure S90.** View of the Mpro binding site (Cys145-His41) for compounds 4q-4u. image of hydrophobic interaction, hydrogen and halogen bonds for ligands (yellow, green and blue color indication H-bond, hydrophobic interaction and halogen bond, Respectively) that prepared by pymol software.
